# Supplementary material for: MYCN-targeting miRNAs are predominantly downregulated during MYCN-driven neuroblastoma tumor formation
Source: PubMed Central journal article supplement (PMC4467143; doi:10.18632/oncotarget.2477), 2014-09-16
Supplement: oncotarget-06-5204-s002.pdf [file oncotarget-06-5204-s002.pdf]

**Supplementary Table S1: Annotation update of mature miRNA from the *miRNA precursor library* in Homo sapiens**

# the seed sequence has changed for 42 miRNAs

# the seed sequence has not changed for 421 miRNAs

| Accession Number | miRBase release | Name         | miRBase release | Name            |
|------------------|-----------------|--------------|-----------------|-----------------|
| MIMAT0000062     | 9.2             | hsa-let-7a   | 20              | hsa-let-7a-5p   |
| MIMAT0000063     | 9.2             | hsa-let-7b   | 20              | hsa-let-7b-5p   |
| MIMAT0000064     | 9.2             | hsa-let-7c   | 20              | hsa-let-7c-5p   |
| MIMAT0000065     | 9.2             | hsa-let-7d   | 20              | hsa-let-7d-5p   |
| MIMAT0000066     | 9.2             | hsa-let-7e   | 20              | hsa-let-7e-5p   |
| MIMAT0000067     | 9.2             | hsa-let-7f   | 20              | hsa-let-7f-5p   |
| MIMAT0000414     | 9.2             | hsa-let-7g   | 20              | hsa-let-7g-5p   |
| MIMAT0000415     | 9.2             | hsa-let-7i   | 20              | hsa-let-7i-5p   |
| MIMAT0000416     | 9.2             | hsa-miR-1    | 20              | hsa-miR-1       |
| MIMAT0000098     | 9.2             | hsa-miR-100  | 20              | hsa-miR-100-5p  |
| MIMAT0000099     | 9.2             | hsa-miR-101  | 20              | hsa-miR-101-3p  |
| MIMAT0000101     | 9.2             | hsa-miR-103  | 20              | hsa-miR-103a-3p |
| MIMAT0000102     | 9.2             | hsa-miR-105  | 20              | hsa-miR-105-5p  |
| MIMAT0000103     | 9.2             | hsa-miR-106a | 20              | hsa-miR-106a-5p |
| MIMAT0000680     | 9.2             | hsa-miR-106b | 20              | hsa-miR-106b-5p |
| MIMAT0000104     | 9.2             | hsa-miR-107  | 20              | hsa-miR-107     |
| MIMAT0000253     | 9.2             | hsa-miR-10a  | 20              | hsa-miR-10a-5p  |
| MIMAT0000254     | 9.2             | hsa-miR-10b  | 20              | hsa-miR-10b-5p  |
| MIMAT0000422     | 9.2             | hsa-miR-124a | 20              | hsa-miR-124-3p  |
| MIMAT0000443     | 9.2             | hsa-miR-125a | 20              | hsa-miR-125a-5p |
| MIMAT0000423     | 9.2             | hsa-miR-125b | 20              | hsa-miR-125b-5p |
| MIMAT0000445     | 9.2             | hsa-miR-126  | 20              | hsa-miR-126-3p  |
| MIMAT0000444     | 9.2             | hsa-miR-126* | 20              | hsa-miR-126-5p  |
| MIMAT0000446     | 9.2             | hsa-miR-127  | 20              | hsa-miR-127-3p  |
| MIMAT0000424     | 9.2             | hsa-miR-128a | 20              | hsa-miR-128-3p  |
| MIMAT0000242     | 9.2             | hsa-miR-129  | 20              | hsa-miR-129-5p  |
| MIMAT0000425     | 9.2             | hsa-miR-130a | 20              | hsa-miR-130a-3p |
| MIMAT0000691     | 9.2             | hsa-miR-130b | 20              | hsa-miR-130b-3p |
| MIMAT0000426     | 9.2             | hsa-miR-132  | 20              | hsa-miR-132-3p  |
| MIMAT0000427     | 9.2             | hsa-miR-133a | 20              | hsa-miR-133a-3p |
| MIMAT0000770     | 9.2             | hsa-miR-133b | 20              | hsa-miR-133b    |

**Supplementary Table S1 (continued)**

| Accession Number | miRBase release | Name           | miRBase release | Name            |
|------------------|-----------------|----------------|-----------------|-----------------|
| MIMAT0000447     | 9.2             | hsa-miR-134    | 20              | hsa-miR-134-5p  |
| MIMAT0000428     | 9.2             | hsa-miR-135a   | 20              | hsa-miR-135a-5p |
| MIMAT0000758     | 9.2             | hsa-miR-135b   | 20              | hsa-miR-135b-5p |
| MIMAT0000448     | 9.2             | hsa-miR-136    | 20              | hsa-miR-136-5p  |
| MIMAT0000429     | 9.2             | hsa-miR-137    | 20              | hsa-miR-137     |
| MIMAT0000430     | 9.2             | hsa-miR-138    | 20              | hsa-miR-138-5p  |
| MIMAT0000250     | 9.2             | hsa-miR-139    | 20              | hsa-miR-139-5p  |
| MIMAT0000431     | 9.2             | hsa-miR-140    | 20              | hsa-miR-140-5p  |
| MIMAT0000432     | 9.2             | hsa-miR-141    | 20              | hsa-miR-141-3p  |
| MIMAT0000434     | 9.2             | hsa-miR-142-3p | 20              | hsa-miR-142-3p  |
| MIMAT0000433     | 9.2             | hsa-miR-142-5p | 20              | hsa-miR-142-5p  |
| MIMAT0000435     | 9.2             | hsa-miR-143    | 20              | hsa-miR-143-3p  |
| MIMAT0000436     | 9.2             | hsa-miR-144    | 20              | hsa-miR-144-3p  |
| MIMAT0000437     | 9.2             | hsa-miR-145    | 20              | hsa-miR-145-5p  |
| MIMAT0000449     | 9.2             | hsa-miR-146a   | 20              | hsa-miR-146a-5p |
| MIMAT0002809     | 9.2             | hsa-miR-146b   | 20              | hsa-miR-146b-5p |
| MIMAT0000251     | 9.2             | hsa-miR-147    | 20              | hsa-miR-147a    |
| MIMAT0000243     | 9.2             | hsa-miR-148a   | 20              | hsa-miR-148a-3p |
| MIMAT0000759     | 9.2             | hsa-miR-148b   | 20              | hsa-miR-148b-3p |
| MIMAT0000450     | 9.2             | hsa-miR-149    | 20              | hsa-miR-149-5p  |
| MIMAT0000451     | 9.2             | hsa-miR-150    | 20              | hsa-miR-150-5p  |
| MIMAT0000757     | 9.2             | hsa-miR-151    | 20              | hsa-miR-151a-3p |
| MIMAT0000438     | 9.2             | hsa-miR-152    | 20              | hsa-miR-152-3p  |
| MIMAT0000439     | 9.2             | hsa-miR-153    | 20              | hsa-miR-153-3p  |
| MIMAT0000452     | 9.2             | hsa-miR-154    | 20              | hsa-miR-154-5p  |
| MIMAT0000453     | 9.2             | hsa-miR-154*   | 20              | hsa-miR-154-3p  |
| MIMAT0000646     | 9.2             | hsa-miR-155    | 20              | hsa-miR-155-5p  |
| MIMAT0000068     | 9.2             | hsa-miR-15a    | 20              | hsa-miR-15a-5p  |
| MIMAT0000417     | 9.2             | hsa-miR-15b    | 20              | hsa-miR-15b-5p  |
| MIMAT0000069     | 9.2             | hsa-miR-16     | 20              | hsa-miR-16-5p   |
| MIMAT0000071     | 9.2             | hsa-miR-17-3p  | 20              | hsa-miR-17-3p   |
| MIMAT0000070     | 9.2             | hsa-miR-17-5p  | 20              | hsa-miR-17-5p   |
| MIMAT0000256     | 9.2             | hsa-miR-181a   | 20              | hsa-miR-181a-5p |

**Supplementary Table S1 (continued)**

| Accession Number | miRBase release | Name          | miRBase release | Name            |
|------------------|-----------------|---------------|-----------------|-----------------|
| MIMAT0000270     | 9.2             | hsa-miR-181a* | 20              | hsa-miR-181a-3p |
| MIMAT0000257     | 9.2             | hsa-miR-181b  | 20              | hsa-miR-181b-5p |
| MIMAT0000258     | 9.2             | hsa-miR-181c  | 20              | hsa-miR-181c-5p |
| MIMAT0002821     | 9.2             | hsa-miR-181d  | 20              | hsa-miR-181d-5p |
| MIMAT0000259     | 9.2             | hsa-miR-182   | 20              | hsa-miR-182-5p  |
| MIMAT0000260     | 9.2             | hsa-miR-182*  | 20              | hsa-miR-182-3p  |
| MIMAT0000261     | 9.2             | hsa-miR-183   | 20              | hsa-miR-183-5p  |
| MIMAT0000454     | 9.2             | hsa-miR-184   | 20              | hsa-miR-184     |
| MIMAT0000455     | 9.2             | hsa-miR-185   | 20              | hsa-miR-185-5p  |
| MIMAT0000456     | 9.2             | hsa-miR-186   | 20              | hsa-miR-186-5p  |
| MIMAT0000262     | 9.2             | hsa-miR-187   | 20              | hsa-miR-187-3p  |
| MIMAT0000457     | 9.2             | hsa-miR-188   | 20              | hsa-miR-188-5p  |
| MIMAT0000079     | 9.2             | hsa-miR-189   | 20              | hsa-miR-24-1-5p |
| MIMAT0000072     | 9.2             | hsa-miR-18a   | 20              | hsa-miR-18a-5p  |
| MIMAT0002891     | 9.2             | hsa-miR-18a*  | 20              | hsa-miR-18a-3p  |
| MIMAT0001412     | 9.2             | hsa-miR-18b   | 20              | hsa-miR-18b-5p  |
| MIMAT0000458     | 9.2             | hsa-miR-190   | 20              | hsa-miR-190a-5p |
| MIMAT0000440     | 9.2             | hsa-miR-191   | 20              | hsa-miR-191-5p  |
| MIMAT0001618     | 9.2             | hsa-miR-191*  | 20              | hsa-miR-191-3p  |
| MIMAT0000222     | 9.2             | hsa-miR-192   | 20              | hsa-miR-192-5p  |
| MIMAT0000459     | 9.2             | hsa-miR-193a  | 20              | hsa-miR-193a-3p |
| MIMAT0002819     | 9.2             | hsa-miR-193b  | 20              | hsa-miR-193b-3p |
| MIMAT0000460     | 9.2             | hsa-miR-194   | 20              | hsa-miR-194-5p  |
| MIMAT0000461     | 9.2             | hsa-miR-195   | 20              | hsa-miR-195-5p  |
| MIMAT0000226     | 9.2             | hsa-miR-196a  | 20              | hsa-miR-196a-5p |
| MIMAT0001080     | 9.2             | hsa-miR-196b  | 20              | hsa-miR-196b-5p |
| MIMAT0000227     | 9.2             | hsa-miR-197   | 20              | hsa-miR-197-3p  |
| MIMAT0000228     | 9.2             | hsa-miR-198   | 20              | hsa-miR-198     |
| MIMAT0000231     | 9.2             | hsa-miR-199a  | 20              | hsa-miR-199a-5p |
| MIMAT0000232     | 9.2             | hsa-miR-199a* | 20              | hsa-miR-199a-3p |
| MIMAT0000263     | 9.2             | hsa-miR-199b  | 20              | hsa-miR-199b-5p |
| MIMAT0000073     | 9.2             | hsa-miR-19a   | 20              | hsa-miR-19a-3p  |
| MIMAT0000074     | 9.2             | hsa-miR-19b   | 20              | hsa-miR-19b-3p  |

**Supplementary Table S1 (continued)**

| Accession Number | miRBase release | Name          | miRBase release | Name            |
|------------------|-----------------|---------------|-----------------|-----------------|
| MIMAT0000682     | 9.2             | hsa-miR-200a  | 20              | hsa-miR-200a-3p |
| MIMAT0001620     | 9.2             | hsa-miR-200a* | 20              | hsa-miR-200a-5p |
| MIMAT0000318     | 9.2             | hsa-miR-200b  | 20              | hsa-miR-200b-3p |
| MIMAT0000617     | 9.2             | hsa-miR-200c  | 20              | hsa-miR-200c-3p |
| MIMAT0002811     | 9.2             | hsa-miR-202   | 20              | hsa-miR-202-3p  |
| MIMAT0002810     | 9.2             | hsa-miR-202*  | 20              | hsa-miR-202-5p  |
| MIMAT0000264     | 9.2             | hsa-miR-203   | 20              | hsa-miR-203a    |
| MIMAT0000265     | 9.2             | hsa-miR-204   | 20              | hsa-miR-204-5p  |
| MIMAT0000266     | 9.2             | hsa-miR-205   | 20              | hsa-miR-205-5p  |
| MIMAT0000462     | 9.2             | hsa-miR-206   | 20              | hsa-miR-206     |
| MIMAT0000241     | 9.2             | hsa-miR-208   | 20              | hsa-miR-208a-3p |
| MIMAT0000075     | 9.2             | hsa-miR-20a   | 20              | hsa-miR-20a-5p  |
| MIMAT0001413     | 9.2             | hsa-miR-20b   | 20              | hsa-miR-20b-5p  |
| MIMAT0000076     | 9.2             | hsa-miR-21    | 20              | hsa-miR-21-5p   |
| MIMAT0000267     | 9.2             | hsa-miR-210   | 20              | hsa-miR-210-3p  |
| MIMAT0000268     | 9.2             | hsa-miR-211   | 20              | hsa-miR-211-5p  |
| MIMAT0000269     | 9.2             | hsa-miR-212   | 20              | hsa-miR-212-3p  |
| MIMAT0000271     | 9.2             | hsa-miR-214   | 20              | hsa-miR-214-3p  |
| MIMAT0000272     | 9.2             | hsa-miR-215   | 20              | hsa-miR-215-5p  |
| MIMAT0000273     | 9.2             | hsa-miR-216   | 20              | hsa-miR-216a-5p |
| MIMAT0000274     | 9.2             | hsa-miR-217   | 20              | hsa-miR-217     |
| MIMAT0000275     | 9.2             | hsa-miR-218   | 20              | hsa-miR-218-5p  |
| MIMAT0000276     | 9.2             | hsa-miR-219   | 20              | hsa-miR-219a-5p |
| MIMAT0000077     | 9.2             | hsa-miR-22    | 20              | hsa-miR-22-3p   |
| MIMAT0000278     | 9.2             | hsa-miR-221   | 20              | hsa-miR-221-3p  |
| MIMAT0000279     | 9.2             | hsa-miR-222   | 20              | hsa-miR-222-3p  |
| MIMAT0000280     | 9.2             | hsa-miR-223   | 20              | hsa-miR-223-3p  |
| MIMAT0000281     | 9.2             | hsa-miR-224   | 20              | hsa-miR-224-5p  |
| MIMAT0000078     | 9.2             | hsa-miR-23a   | 20              | hsa-miR-23a-3p  |
| MIMAT0000418     | 9.2             | hsa-miR-23b   | 20              | hsa-miR-23b-3p  |
| MIMAT0000080     | 9.2             | hsa-miR-24    | 20              | hsa-miR-24-3p   |
| MIMAT0000081     | 9.2             | hsa-miR-25    | 20              | hsa-miR-25-3p   |
| MIMAT0000082     | 9.2             | hsa-miR-26a   | 20              | hsa-miR-26a-5p  |

**Supplementary Table S1 (continued)**

| Accession Number | miRBase release | Name           | miRBase release | Name            |
|------------------|-----------------|----------------|-----------------|-----------------|
| MIMAT0000083     | 9.2             | hsa-miR-26b    | 20              | hsa-miR-26b-5p  |
| MIMAT0000084     | 9.2             | hsa-miR-27a    | 20              | hsa-miR-27a-3p  |
| MIMAT0000419     | 9.2             | hsa-miR-27b    | 20              | hsa-miR-27b-3p  |
| MIMAT0000085     | 9.2             | hsa-miR-28     | 20              | hsa-miR-28-5p   |
| MIMAT0000690     | 9.2             | hsa-miR-296    | 20              | hsa-miR-296-5p  |
| MIMAT0004450     | 9.2             | hsa-miR-297    | 20              | hsa-miR-297     |
| MIMAT0000687     | 9.2             | hsa-miR-299-3p | 20              | hsa-miR-299-3p  |
| MIMAT0002890     | 9.2             | hsa-miR-299-5p | 20              | hsa-miR-299-5p  |
| MIMAT0000086     | 9.2             | hsa-miR-29a    | 20              | hsa-miR-29a-3p  |
| MIMAT0000100     | 9.2             | hsa-miR-29b    | 20              | hsa-miR-29b-3p  |
| MIMAT0000681     | 9.2             | hsa-miR-29c    | 20              | hsa-miR-29c-3p  |
| MIMAT0000688     | 9.2             | hsa-miR-301    | 20              | hsa-miR-301a-3p |
| MIMAT0000684     | 9.2             | hsa-miR-302a   | 20              | hsa-miR-302a-3p |
| MIMAT0000683     | 9.2             | hsa-miR-302a*  | 20              | hsa-miR-302a-5p |
| MIMAT0000715     | 9.2             | hsa-miR-302b   | 20              | hsa-miR-302b-3p |
| MIMAT0000714     | 9.2             | hsa-miR-302b*  | 20              | hsa-miR-302b-5p |
| MIMAT0000717     | 9.2             | hsa-miR-302c   | 20              | hsa-miR-302c-3p |
| MIMAT0000716     | 9.2             | hsa-miR-302c*  | 20              | hsa-miR-302c-5p |
| MIMAT0000718     | 9.2             | hsa-miR-302d   | 20              | hsa-miR-302d-3p |
| MIMAT0000088     | 9.2             | hsa-miR-30a-3p | 20              | hsa-miR-30a-3p  |
| MIMAT0000087     | 9.2             | hsa-miR-30a-5p | 20              | hsa-miR-30a-5p  |
| MIMAT0000420     | 9.2             | hsa-miR-30b    | 20              | hsa-miR-30b-5p  |
| MIMAT0000244     | 9.2             | hsa-miR-30c    | 20              | hsa-miR-30c-5p  |
| MIMAT0000245     | 9.2             | hsa-miR-30d    | 20              | hsa-miR-30d-5p  |
| MIMAT0000693     | 9.2             | hsa-miR-30e-3p | 20              | hsa-miR-30e-3p  |
| MIMAT0000692     | 9.2             | hsa-miR-30e-5p | 20              | hsa-miR-30e-5p  |
| MIMAT0000089     | 9.2             | hsa-miR-31     | 20              | hsa-miR-31-5p   |
| MIMAT0000090     | 9.2             | hsa-miR-32     | 20              | hsa-miR-32-5p   |
| MIMAT0000510     | 9.2             | hsa-miR-320    | 20              | hsa-miR-320a    |
| MIMAT0000755     | 9.2             | hsa-miR-323    | 20              | hsa-miR-323a-3p |
| MIMAT0000762     | 9.2             | hsa-miR-324-3p | 20              | hsa-miR-324-3p  |
| MIMAT0000761     | 9.2             | hsa-miR-324-5p | 20              | hsa-miR-324-5p  |
| MIMAT0000771     | 9.2             | hsa-miR-325    | 20              | hsa-miR-325     |

**Supplementary Table S1 (continued)**

| Accession Number | miRBase release | Name           | miRBase release | Name            |
|------------------|-----------------|----------------|-----------------|-----------------|
| MIMAT0000756     | 9.2             | hsa-miR-326    | 20              | hsa-miR-326     |
| MIMAT0000752     | 9.2             | hsa-miR-328    | 20              | hsa-miR-328-3p  |
| MIMAT0001629     | 9.2             | hsa-miR-329    | 20              | hsa-miR-329-3p  |
| MIMAT0000091     | 9.2             | hsa-miR-33     | 20              | hsa-miR-33a-5p  |
| MIMAT0000751     | 9.2             | hsa-miR-330    | 20              | hsa-miR-330-3p  |
| MIMAT0000760     | 9.2             | hsa-miR-331    | 20              | hsa-miR-331-3p  |
| MIMAT0000765     | 9.2             | hsa-miR-335    | 20              | hsa-miR-335-5p  |
| MIMAT0000754     | 9.2             | hsa-miR-337    | 20              | hsa-miR-337-3p  |
| MIMAT0000763     | 9.2             | hsa-miR-338    | 20              | hsa-miR-338-3p  |
| MIMAT0000764     | 9.2             | hsa-miR-339    | 20              | hsa-miR-339-5p  |
| MIMAT0003301     | 9.2             | hsa-miR-33b    | 20              | hsa-miR-33b-5p  |
| MIMAT0000750     | 9.2             | hsa-miR-340    | 20              | hsa-miR-340-3p  |
| MIMAT0000753     | 9.2             | hsa-miR-342    | 20              | hsa-miR-342-3p  |
| MIMAT0000772     | 9.2             | hsa-miR-345    | 20              | hsa-miR-345-5p  |
| MIMAT0000773     | 9.2             | hsa-miR-346    | 20              | hsa-miR-346     |
| MIMAT0000255     | 9.2             | hsa-miR-34a    | 20              | hsa-miR-34a-5p  |
| MIMAT0000685     | 9.2             | hsa-miR-34b    | 20              | hsa-miR-34b-5p  |
| MIMAT0000686     | 9.2             | hsa-miR-34c    | 20              | hsa-miR-34c-5p  |
| MIMAT0000703     | 9.2             | hsa-miR-361    | 20              | hsa-miR-361-5p  |
| MIMAT0000705     | 9.2             | hsa-miR-362    | 20              | hsa-miR-362-5p  |
| MIMAT0000707     | 9.2             | hsa-miR-363    | 20              | hsa-miR-363-3p  |
| MIMAT0003385     | 9.2             | hsa-miR-363*   | 20              | hsa-miR-363-5p  |
| MIMAT0000710     | 9.2             | hsa-miR-365    | 20              | hsa-miR-365a-3p |
| MIMAT0000719     | 9.2             | hsa-miR-367    | 20              | hsa-miR-367-3p  |
| MIMAT0000720     | 9.2             | hsa-miR-368    | 20              | hsa-miR-376c-3p |
| MIMAT0000721     | 9.2             | hsa-miR-369-3p | 20              | hsa-miR-369-3p  |
| MIMAT0001621     | 9.2             | hsa-miR-369-5p | 20              | hsa-miR-369-5p  |
| MIMAT0000722     | 9.2             | hsa-miR-370    | 20              | hsa-miR-370-3p  |
| MIMAT0000723     | 9.2             | hsa-miR-371    | 20              | hsa-miR-371a-3p |
| MIMAT0000724     | 9.2             | hsa-miR-372    | 20              | hsa-miR-372-3p  |
| MIMAT0000726     | 9.2             | hsa-miR-373    | 20              | hsa-miR-373-3p  |
| MIMAT0000725     | 9.2             | hsa-miR-373*   | 20              | hsa-miR-373-5p  |
| MIMAT0000727     | 9.2             | hsa-miR-374    | 20              | hsa-miR-374a-5p |

**Supplementary Table S1 (continued)**

| Accession Number | miRBase release | Name           | miRBase release | Name            |
|------------------|-----------------|----------------|-----------------|-----------------|
| MIMAT0000728     | 9.2             | hsa-miR-375    | 20              | hsa-miR-375     |
| MIMAT0000729     | 9.2             | hsa-miR-376a   | 20              | hsa-miR-376a-3p |
| MIMAT0003386     | 9.2             | hsa-miR-376a*  | 20              | hsa-miR-376a-5p |
| MIMAT0002172     | 9.2             | hsa-miR-376b   | 20              | hsa-miR-376b-3p |
| MIMAT0000730     | 9.2             | hsa-miR-377    | 20              | hsa-miR-377-3p  |
| MIMAT0000731     | 9.2             | hsa-miR-378    | 20              | hsa-miR-378a-5p |
| MIMAT0000733     | 9.2             | hsa-miR-379    | 20              | hsa-miR-379-5p  |
| MIMAT0000735     | 9.2             | hsa-miR-380-3p | 20              | hsa-miR-380-3p  |
| MIMAT0000734     | 9.2             | hsa-miR-380-5p | 20              | hsa-miR-380-5p  |
| MIMAT0000736     | 9.2             | hsa-miR-381    | 20              | hsa-miR-381-3p  |
| MIMAT0000737     | 9.2             | hsa-miR-382    | 20              | hsa-miR-382-5p  |
| MIMAT0000738     | 9.2             | hsa-miR-383    | 20              | hsa-miR-383-5p  |
| MIMAT0001075     | 9.2             | hsa-miR-384    | 20              | hsa-miR-384     |
| MIMAT0001639     | 9.2             | hsa-miR-409-3p | 20              | hsa-miR-409-3p  |
| MIMAT0001638     | 9.2             | hsa-miR-409-5p | 20              | hsa-miR-409-5p  |
| MIMAT0002171     | 9.2             | hsa-miR-410    | 20              | hsa-miR-410-3p  |
| MIMAT0003329     | 9.2             | hsa-miR-411    | 20              | hsa-miR-411-5p  |
| MIMAT0002170     | 9.2             | hsa-miR-412    | 20              | hsa-miR-412-3p  |
| MIMAT0003339     | 9.2             | hsa-miR-421    | 20              | hsa-miR-421     |
| MIMAT0001339     | 9.2             | hsa-miR-422a   | 20              | hsa-miR-422a    |
| MIMAT0000732     | 9.2             | hsa-miR-422b   | 20              | hsa-miR-378a-3p |
| MIMAT0001340     | 9.2             | hsa-miR-423    | 20              | hsa-miR-423-3p  |
| MIMAT0001341     | 9.2             | hsa-miR-424    | 20              | hsa-miR-424-5p  |
| MIMAT0001343     | 9.2             | hsa-miR-425-3p | 20              | hsa-miR-425-3p  |
| MIMAT0003393     | 9.2             | hsa-miR-425-5p | 20              | hsa-miR-425-5p  |
| MIMAT0001536     | 9.2             | hsa-miR-429    | 20              | hsa-miR-429     |
| MIMAT0001625     | 9.2             | hsa-miR-431    | 20              | hsa-miR-431-5p  |
| MIMAT0002814     | 9.2             | hsa-miR-432    | 20              | hsa-miR-432-5p  |
| MIMAT0002815     | 9.2             | hsa-miR-432*   | 20              | hsa-miR-432-3p  |
| MIMAT0001627     | 9.2             | hsa-miR-433    | 20              | hsa-miR-433-3p  |
| MIMAT0001532     | 9.2             | hsa-miR-448    | 20              | hsa-miR-448     |
| MIMAT0001541     | 9.2             | hsa-miR-449    | 20              | hsa-miR-449a    |
| MIMAT0003327     | 9.2             | hsa-miR-449b   | 20              | hsa-miR-449b-5p |

**Supplementary Table S1 (continued)**

| Accession Number | miRBase release | Name           | miRBase release | Name            |
|------------------|-----------------|----------------|-----------------|-----------------|
| MIMAT0001545     | 9.2             | hsa-miR-450    | 20              | hsa-miR-450a-5p |
| MIMAT0001631     | 9.2             | hsa-miR-451    | 20              | hsa-miR-451a    |
| MIMAT0001635     | 9.2             | hsa-miR-452    | 20              | hsa-miR-452-5p  |
| MIMAT0001636     | 9.2             | hsa-miR-452*   | 20              | hsa-miR-452-3p  |
| MIMAT0001630     | 9.2             | hsa-miR-453    | 20              | hsa-miR-323b-5p |
| MIMAT0003885     | 9.2             | hsa-miR-454-3p | 20              | hsa-miR-454-3p  |
| MIMAT0003884     | 9.2             | hsa-miR-454-5p | 20              | hsa-miR-454-5p  |
| MIMAT0003150     | 9.2             | hsa-miR-455    | 20              | hsa-miR-455-5p  |
| MIMAT0002173     | 9.2             | hsa-miR-483    | 20              | hsa-miR-483-3p  |
| MIMAT0002174     | 9.2             | hsa-miR-484    | 20              | hsa-miR-484     |
| MIMAT0002176     | 9.2             | hsa-miR-485-3p | 20              | hsa-miR-485-3p  |
| MIMAT0002175     | 9.2             | hsa-miR-485-5p | 20              | hsa-miR-485-5p  |
| MIMAT0002177     | 9.2             | hsa-miR-486    | 20              | hsa-miR-486-5p  |
| MIMAT0002178     | 9.2             | hsa-miR-487a   | 20              | hsa-miR-487a-3p |
| MIMAT0003180     | 9.2             | hsa-miR-487b   | 20              | hsa-miR-487b-3p |
| MIMAT0002804     | 9.2             | hsa-miR-488    | 20              | hsa-miR-488-5p  |
| MIMAT0002805     | 9.2             | hsa-miR-489    | 20              | hsa-miR-489-3p  |
| MIMAT0002806     | 9.2             | hsa-miR-490    | 20              | hsa-miR-490-3p  |
| MIMAT0002807     | 9.2             | hsa-miR-491    | 20              | hsa-miR-491-5p  |
| MIMAT0002812     | 9.2             | hsa-miR-492    | 20              | hsa-miR-492     |
| MIMAT0003161     | 9.2             | hsa-miR-493-3p | 20              | hsa-miR-493-3p  |
| MIMAT0002813     | 9.2             | hsa-miR-493-5p | 20              | hsa-miR-493-5p  |
| MIMAT0002816     | 9.2             | hsa-miR-494    | 20              | hsa-miR-494-3p  |
| MIMAT0002817     | 9.2             | hsa-miR-495    | 20              | hsa-miR-495-3p  |
| MIMAT0002818     | 9.2             | hsa-miR-496    | 20              | hsa-miR-496     |
| MIMAT0002820     | 9.2             | hsa-miR-497    | 20              | hsa-miR-497-5p  |
| MIMAT0002824     | 9.2             | hsa-miR-498    | 20              | hsa-miR-498     |
| MIMAT0002870     | 9.2             | hsa-miR-499    | 20              | hsa-miR-499a-5p |
| MIMAT0002871     | 9.2             | hsa-miR-500    | 20              | hsa-miR-500a-3p |
| MIMAT0002872     | 9.2             | hsa-miR-501    | 20              | hsa-miR-501-5p  |
| MIMAT0002873     | 9.2             | hsa-miR-502    | 20              | hsa-miR-502-5p  |
| MIMAT0002874     | 9.2             | hsa-miR-503    | 20              | hsa-miR-503-5p  |
| MIMAT0002875     | 9.2             | hsa-miR-504    | 20              | hsa-miR-504-5p  |



**Supplementary Table S1 (continued)**

| Accession Number | miRBase release | Name           | miRBase release | Name            |
|------------------|-----------------|----------------|-----------------|-----------------|
| MIMAT0002876     | 9.2             | hsa-miR-505    | 20              | hsa-miR-505-3p  |
| MIMAT0002878     | 9.2             | hsa-miR-506    | 20              | hsa-miR-506-3p  |
| MIMAT0002879     | 9.2             | hsa-miR-507    | 20              | hsa-miR-507     |
| MIMAT0002880     | 9.2             | hsa-miR-508    | 20              | hsa-miR-508-3p  |
| MIMAT0002881     | 9.2             | hsa-miR-509    | 20              | hsa-miR-509-3p  |
| MIMAT0002882     | 9.2             | hsa-miR-510    | 20              | hsa-miR-510-5p  |
| MIMAT0002808     | 9.2             | hsa-miR-511    | 20              | hsa-miR-511-5p  |
| MIMAT0002823     | 9.2             | hsa-miR-512-3p | 20              | hsa-miR-512-3p  |
| MIMAT0002822     | 9.2             | hsa-miR-512-5p | 20              | hsa-miR-512-5p  |
| MIMAT0002877     | 9.2             | hsa-miR-513    | 20              | hsa-miR-513a-5p |
| MIMAT0002883     | 9.2             | hsa-miR-514    | 20              | hsa-miR-514a-3p |
| MIMAT0002827     | 9.2             | hsa-miR-515-3p | 20              | hsa-miR-515-3p  |
| MIMAT0002826     | 9.2             | hsa-miR-515-5p | 20              | hsa-miR-515-5p  |
| MIMAT0002860     | 9.2             | hsa-miR-516-3p | 20              | hsa-miR-516b-3p |
| MIMAT0002859     | 9.2             | hsa-miR-516-5p | 20              | hsa-miR-516b-5p |
| MIMAT0002851     | 9.2             | hsa-miR-517*   | 20              | hsa-miR-517-5p  |
| MIMAT0002852     | 9.2             | hsa-miR-517a   | 20              | hsa-miR-517a-3p |
| MIMAT0002857     | 9.2             | hsa-miR-517b   | 20              | hsa-miR-517b-3p |
| MIMAT0002866     | 9.2             | hsa-miR-517c   | 20              | hsa-miR-517c-3p |
| MIMAT0002863     | 9.2             | hsa-miR-518a   | 20              | hsa-miR-518a-3p |
| MIMAT0002844     | 9.2             | hsa-miR-518b   | 20              | hsa-miR-518b    |
| MIMAT0002848     | 9.2             | hsa-miR-518c   | 20              | hsa-miR-518c-3p |
| MIMAT0002847     | 9.2             | hsa-miR-518c*  | 20              | hsa-miR-518c-5p |
| MIMAT0002864     | 9.2             | hsa-miR-518d   | 20              | hsa-miR-518d-3p |
| MIMAT0002861     | 9.2             | hsa-miR-518e   | 20              | hsa-miR-518e-3p |
| MIMAT0002842     | 9.2             | hsa-miR-518f   | 20              | hsa-miR-518f-3p |
| MIMAT0002841     | 9.2             | hsa-miR-518f*  | 20              | hsa-miR-518f-5p |
| MIMAT0002869     | 9.2             | hsa-miR-519a   | 20              | hsa-miR-519a-3p |
| MIMAT0002837     | 9.2             | hsa-miR-519b   | 20              | hsa-miR-519b-3p |
| MIMAT0002832     | 9.2             | hsa-miR-519c   | 20              | hsa-miR-519c-3p |
| MIMAT0002853     | 9.2             | hsa-miR-519d   | 20              | hsa-miR-519d-3p |
| MIMAT0002829     | 9.2             | hsa-miR-519e   | 20              | hsa-miR-519e-3p |
| MIMAT0002828     | 9.2             | hsa-miR-519e*  | 20              | hsa-miR-519e-5p |

**Supplementary Table S1 (continued)**

| Accession Number | miRBase release | Name           | miRBase release | Name            |
|------------------|-----------------|----------------|-----------------|-----------------|
| MIMAT0002834     | 9.2             | hsa-miR-520a   | 20              | hsa-miR-520a-3p |
| MIMAT0002833     | 9.2             | hsa-miR-520a*  | 20              | hsa-miR-520a-5p |
| MIMAT0002843     | 9.2             | hsa-miR-520b   | 20              | hsa-miR-520b    |
| MIMAT0002846     | 9.2             | hsa-miR-520c   | 20              | hsa-miR-520c-3p |
| MIMAT0002856     | 9.2             | hsa-miR-520d   | 20              | hsa-miR-520d-3p |
| MIMAT0002855     | 9.2             | hsa-miR-520d*  | 20              | hsa-miR-520d-5p |
| MIMAT0002825     | 9.2             | hsa-miR-520e   | 20              | hsa-miR-520e    |
| MIMAT0002830     | 9.2             | hsa-miR-520f   | 20              | hsa-miR-520f-3p |
| MIMAT0002858     | 9.2             | hsa-miR-520g   | 20              | hsa-miR-520g-3p |
| MIMAT0002867     | 9.2             | hsa-miR-520h   | 20              | hsa-miR-520h    |
| MIMAT0002854     | 9.2             | hsa-miR-521    | 20              | hsa-miR-521     |
| MIMAT0002868     | 9.2             | hsa-miR-522    | 20              | hsa-miR-522-3p  |
| MIMAT0002840     | 9.2             | hsa-miR-523    | 20              | hsa-miR-523-3p  |
| MIMAT0002850     | 9.2             | hsa-miR-524    | 20              | hsa-miR-524-3p  |
| MIMAT0002849     | 9.2             | hsa-miR-524*   | 20              | hsa-miR-524-5p  |
| MIMAT0002838     | 9.2             | hsa-miR-525    | 20              | hsa-miR-525-5p  |
| MIMAT0002839     | 9.2             | hsa-miR-525*   | 20              | hsa-miR-525-3p  |
| MIMAT0002845     | 9.2             | hsa-miR-526a   | 20              | hsa-miR-526a    |
| MIMAT0002835     | 9.2             | hsa-miR-526b   | 20              | hsa-miR-526b-5p |
| MIMAT0002836     | 9.2             | hsa-miR-526b*  | 20              | hsa-miR-526b-3p |
| MIMAT0002831     | 9.2             | hsa-miR-526c   | 20              | hsa-miR-519c-5p |
| MIMAT0002862     | 9.2             | hsa-miR-527    | 20              | hsa-miR-527     |
| MIMAT0002888     | 9.2             | hsa-miR-532    | 20              | hsa-miR-532-5p  |
| MIMAT0003163     | 9.2             | hsa-miR-539    | 20              | hsa-miR-539-5p  |
| MIMAT0003389     | 9.2             | hsa-miR-542-3p | 20              | hsa-miR-542-3p  |
| MIMAT0003340     | 9.2             | hsa-miR-542-5p | 20              | hsa-miR-542-5p  |
| MIMAT0003164     | 9.2             | hsa-miR-544    | 20              | hsa-miR-544a    |
| MIMAT0003165     | 9.2             | hsa-miR-545    | 20              | hsa-miR-545-3p  |
| MIMAT0003251     | 9.2             | hsa-miR-548a   | 20              | hsa-miR-548a-3p |
| MIMAT0003254     | 9.2             | hsa-miR-548b   | 20              | hsa-miR-548b-3p |
| MIMAT0003285     | 9.2             | hsa-miR-548c   | 20              | hsa-miR-548c-3p |
| MIMAT0003323     | 9.2             | hsa-miR-548d   | 20              | hsa-miR-548d-3p |
| MIMAT0003333     | 9.2             | hsa-miR-549    | 20              | hsa-miR-549a    |

**Supplementary Table S1 (continued)**

| Accession Number | miRBase release | Name         | miRBase release | Name            |
|------------------|-----------------|--------------|-----------------|-----------------|
| MIMAT0003257     | 9.2             | hsa-miR-550  | 20              | hsa-miR-550a-3p |
| MIMAT0003214     | 9.2             | hsa-miR-551a | 20              | hsa-miR-551a    |
| MIMAT0003233     | 9.2             | hsa-miR-551b | 20              | hsa-miR-551b-3p |
| MIMAT0003215     | 9.2             | hsa-miR-552  | 20              | hsa-miR-552-3p  |
| MIMAT0003216     | 9.2             | hsa-miR-553  | 20              | hsa-miR-553     |
| MIMAT0003217     | 9.2             | hsa-miR-554  | 20              | hsa-miR-554     |
| MIMAT0003219     | 9.2             | hsa-miR-555  | 20              | hsa-miR-555     |
| MIMAT0003220     | 9.2             | hsa-miR-556  | 20              | hsa-miR-556-5p  |
| MIMAT0003221     | 9.2             | hsa-miR-557  | 20              | hsa-miR-557     |
| MIMAT0003222     | 9.2             | hsa-miR-558  | 20              | hsa-miR-558     |
| MIMAT0003223     | 9.2             | hsa-miR-559  | 20              | hsa-miR-559     |
| MIMAT0003225     | 9.2             | hsa-miR-561  | 20              | hsa-miR-561-3p  |
| MIMAT0003226     | 9.2             | hsa-miR-562  | 20              | hsa-miR-562     |
| MIMAT0003227     | 9.2             | hsa-miR-563  | 20              | hsa-miR-563     |
| MIMAT0003228     | 9.2             | hsa-miR-564  | 20              | hsa-miR-564     |
| MIMAT0003230     | 9.2             | hsa-miR-566  | 20              | hsa-miR-566     |
| MIMAT0003231     | 9.2             | hsa-miR-567  | 20              | hsa-miR-567     |
| MIMAT0003232     | 9.2             | hsa-miR-568  | 20              | hsa-miR-568     |
| MIMAT0003234     | 9.2             | hsa-miR-569  | 20              | hsa-miR-569     |
| MIMAT0003235     | 9.2             | hsa-miR-570  | 20              | hsa-miR-570-3p  |
| MIMAT0003236     | 9.2             | hsa-miR-571  | 20              | hsa-miR-571     |
| MIMAT0003237     | 9.2             | hsa-miR-572  | 20              | hsa-miR-572     |
| MIMAT0003238     | 9.2             | hsa-miR-573  | 20              | hsa-miR-573     |
| MIMAT0003239     | 9.2             | hsa-miR-574  | 20              | hsa-miR-574-3p  |
| MIMAT0003240     | 9.2             | hsa-miR-575  | 20              | hsa-miR-575     |
| MIMAT0003241     | 9.2             | hsa-miR-576  | 20              | hsa-miR-576-5p  |
| MIMAT0003242     | 9.2             | hsa-miR-577  | 20              | hsa-miR-577     |
| MIMAT0003243     | 9.2             | hsa-miR-578  | 20              | hsa-miR-578     |
| MIMAT0003244     | 9.2             | hsa-miR-579  | 20              | hsa-miR-579-3p  |
| MIMAT0003245     | 9.2             | hsa-miR-580  | 20              | hsa-miR-580-3p  |
| MIMAT0003246     | 9.2             | hsa-miR-581  | 20              | hsa-miR-581     |
| MIMAT0003247     | 9.2             | hsa-miR-582  | 20              | hsa-miR-582-5p  |
| MIMAT0003248     | 9.2             | hsa-miR-583  | 20              | hsa-miR-583     |

**Supplementary Table S1 (continued)**

| Accession Number | miRBase release | Name        | miRBase release | Name           |
|------------------|-----------------|-------------|-----------------|----------------|
| MIMAT0003249     | 9.2             | hsa-miR-584 | 20              | hsa-miR-584-5p |
| MIMAT0003250     | 9.2             | hsa-miR-585 | 20              | hsa-miR-585-3p |
| MIMAT0003252     | 9.2             | hsa-miR-586 | 20              | hsa-miR-586    |
| MIMAT0003253     | 9.2             | hsa-miR-587 | 20              | hsa-miR-587    |
| MIMAT0003255     | 9.2             | hsa-miR-588 | 20              | hsa-miR-588    |
| MIMAT0003256     | 9.2             | hsa-miR-589 | 20              | hsa-miR-589-3p |
| MIMAT0003258     | 9.2             | hsa-miR-590 | 20              | hsa-miR-590-5p |
| MIMAT0003259     | 9.2             | hsa-miR-591 | 20              | hsa-miR-591    |
| MIMAT0003260     | 9.2             | hsa-miR-592 | 20              | hsa-miR-592    |
| MIMAT0003261     | 9.2             | hsa-miR-593 | 20              | hsa-miR-593-5p |
| MIMAT0003263     | 9.2             | hsa-miR-595 | 20              | hsa-miR-595    |
| MIMAT0003264     | 9.2             | hsa-miR-596 | 20              | hsa-miR-596    |
| MIMAT0003265     | 9.2             | hsa-miR-597 | 20              | hsa-miR-597-5p |
| MIMAT0003266     | 9.2             | hsa-miR-598 | 20              | hsa-miR-598-3p |
| MIMAT0003267     | 9.2             | hsa-miR-599 | 20              | hsa-miR-599    |
| MIMAT0003268     | 9.2             | hsa-miR-600 | 20              | hsa-miR-600    |
| MIMAT0003269     | 9.2             | hsa-miR-601 | 20              | hsa-miR-601    |
| MIMAT0003270     | 9.2             | hsa-miR-602 | 20              | hsa-miR-602    |
| MIMAT0003271     | 9.2             | hsa-miR-603 | 20              | hsa-miR-603    |
| MIMAT0003272     | 9.2             | hsa-miR-604 | 20              | hsa-miR-604    |
| MIMAT0003273     | 9.2             | hsa-miR-605 | 20              | hsa-miR-605-5p |
| MIMAT0003274     | 9.2             | hsa-miR-606 | 20              | hsa-miR-606    |
| MIMAT0003275     | 9.2             | hsa-miR-607 | 20              | hsa-miR-607    |
| MIMAT0003276     | 9.2             | hsa-miR-608 | 20              | hsa-miR-608    |
| MIMAT0003277     | 9.2             | hsa-miR-609 | 20              | hsa-miR-609    |
| MIMAT0003278     | 9.2             | hsa-miR-610 | 20              | hsa-miR-610    |
| MIMAT0003279     | 9.2             | hsa-miR-611 | 20              | hsa-miR-611    |
| MIMAT0003280     | 9.2             | hsa-miR-612 | 20              | hsa-miR-612    |
| MIMAT0003281     | 9.2             | hsa-miR-613 | 20              | hsa-miR-613    |
| MIMAT0003282     | 9.2             | hsa-miR-614 | 20              | hsa-miR-614    |
| MIMAT0003283     | 9.2             | hsa-miR-615 | 20              | hsa-miR-615-3p |
| MIMAT0003284     | 9.2             | hsa-miR-616 | 20              | hsa-miR-616-5p |
| MIMAT0003286     | 9.2             | hsa-miR-617 | 20              | hsa-miR-617    |

**Supplementary Table S1 (continued)**

| Accession Number | miRBase release | Name        | miRBase release | Name            |
|------------------|-----------------|-------------|-----------------|-----------------|
| MIMAT0003287     | 9.2             | hsa-miR-618 | 20              | hsa-miR-618     |
| MIMAT0003288     | 9.2             | hsa-miR-619 | 20              | hsa-miR-619-3p  |
| MIMAT0003289     | 9.2             | hsa-miR-620 | 20              | hsa-miR-620     |
| MIMAT0003290     | 9.2             | hsa-miR-621 | 20              | hsa-miR-621     |
| MIMAT0003291     | 9.2             | hsa-miR-622 | 20              | hsa-miR-622     |
| MIMAT0003292     | 9.2             | hsa-miR-623 | 20              | hsa-miR-623     |
| MIMAT0003293     | 9.2             | hsa-miR-624 | 20              | hsa-miR-624-5p  |
| MIMAT0003294     | 9.2             | hsa-miR-625 | 20              | hsa-miR-625-5p  |
| MIMAT0003295     | 9.2             | hsa-miR-626 | 20              | hsa-miR-626     |
| MIMAT0003296     | 9.2             | hsa-miR-627 | 20              | hsa-miR-627-5p  |
| MIMAT0003297     | 9.2             | hsa-miR-628 | 20              | hsa-miR-628-3p  |
| MIMAT0003298     | 9.2             | hsa-miR-629 | 20              | hsa-miR-629-3p  |
| MIMAT0003299     | 9.2             | hsa-miR-630 | 20              | hsa-miR-630     |
| MIMAT0003300     | 9.2             | hsa-miR-631 | 20              | hsa-miR-631     |
| MIMAT0003302     | 9.2             | hsa-miR-632 | 20              | hsa-miR-632     |
| MIMAT0003303     | 9.2             | hsa-miR-633 | 20              | hsa-miR-633     |
| MIMAT0003304     | 9.2             | hsa-miR-634 | 20              | hsa-miR-634     |
| MIMAT0003305     | 9.2             | hsa-miR-635 | 20              | hsa-miR-635     |
| MIMAT0003306     | 9.2             | hsa-miR-636 | 20              | hsa-miR-636     |
| MIMAT0003307     | 9.2             | hsa-miR-637 | 20              | hsa-miR-637     |
| MIMAT0003308     | 9.2             | hsa-miR-638 | 20              | hsa-miR-638     |
| MIMAT0003309     | 9.2             | hsa-miR-639 | 20              | hsa-miR-639     |
| MIMAT0003310     | 9.2             | hsa-miR-640 | 20              | hsa-miR-640     |
| MIMAT0003311     | 9.2             | hsa-miR-641 | 20              | hsa-miR-641     |
| MIMAT0003312     | 9.2             | hsa-miR-642 | 20              | hsa-miR-642a-5p |
| MIMAT0003313     | 9.2             | hsa-miR-643 | 20              | hsa-miR-643     |
| MIMAT0003314     | 9.2             | hsa-miR-644 | 20              | hsa-miR-644a    |
| MIMAT0003315     | 9.2             | hsa-miR-645 | 20              | hsa-miR-645     |
| MIMAT0003316     | 9.2             | hsa-miR-646 | 20              | hsa-miR-646     |
| MIMAT0003317     | 9.2             | hsa-miR-647 | 20              | hsa-miR-647     |
| MIMAT0003318     | 9.2             | hsa-miR-648 | 20              | hsa-miR-648     |
| MIMAT0003319     | 9.2             | hsa-miR-649 | 20              | hsa-miR-649     |
| MIMAT0003320     | 9.2             | hsa-miR-650 | 20              | hsa-miR-650     |

**Supplementary Table S1 (continued)**

| Accession Number | miRBase release | Name           | miRBase release | Name           |
|------------------|-----------------|----------------|-----------------|----------------|
| MIMAT0003321     | 9.2             | hsa-miR-651    | 20              | hsa-miR-651-5p |
| MIMAT0003322     | 9.2             | hsa-miR-652    | 20              | hsa-miR-652-3p |
| MIMAT0003328     | 9.2             | hsa-miR-653    | 20              | hsa-miR-653-5p |
| MIMAT0003330     | 9.2             | hsa-miR-654    | 20              | hsa-miR-654-5p |
| MIMAT0003331     | 9.2             | hsa-miR-655    | 20              | hsa-miR-655-3p |
| MIMAT0003332     | 9.2             | hsa-miR-656    | 20              | hsa-miR-656-3p |
| MIMAT0003335     | 9.2             | hsa-miR-657    | 20              | hsa-miR-657    |
| MIMAT0003336     | 9.2             | hsa-miR-658    | 20              | hsa-miR-658    |
| MIMAT0003337     | 9.2             | hsa-miR-659    | 20              | hsa-miR-659-3p |
| MIMAT0003338     | 9.2             | hsa-miR-660    | 20              | hsa-miR-660-5p |
| MIMAT0003324     | 9.2             | hsa-miR-661    | 20              | hsa-miR-661    |
| MIMAT0003325     | 9.2             | hsa-miR-662    | 20              | hsa-miR-662    |
| MIMAT0003326     | 9.2             | hsa-miR-663    | 20              | hsa-miR-663a   |
| MIMAT0003881     | 9.2             | hsa-miR-668    | 20              | hsa-miR-668-3p |
| MIMAT0003880     | 9.2             | hsa-miR-671    | 20              | hsa-miR-671-5p |
| MIMAT0004284     | 9.2             | hsa-miR-675    | 20              | hsa-miR-675-5p |
| MIMAT0000252     | 9.2             | hsa-miR-7      | 20              | hsa-miR-7-5p   |
| MIMAT0003879     | 9.2             | hsa-miR-758    | 20              | hsa-miR-758-3p |
| MIMAT0003945     | 9.2             | hsa-miR-765    | 20              | hsa-miR-765    |
| MIMAT0003888     | 9.2             | hsa-miR-766    | 20              | hsa-miR-766-3p |
| MIMAT0003883     | 9.2             | hsa-miR-767-3p | 20              | hsa-miR-767-3p |
| MIMAT0003882     | 9.2             | hsa-miR-767-5p | 20              | hsa-miR-767-5p |
| MIMAT0003887     | 9.2             | hsa-miR-769-3p | 20              | hsa-miR-769-3p |
| MIMAT0003886     | 9.2             | hsa-miR-769-5p | 20              | hsa-miR-769-5p |
| MIMAT0003948     | 9.2             | hsa-miR-770-5p | 20              | hsa-miR-770-5p |
| MIMAT0004185     | 9.2             | hsa-miR-802    | 20              | hsa-miR-802    |
| MIMAT0000441     | 9.2             | hsa-miR-9      | 20              | hsa-miR-9-5p   |
| MIMAT0000442     | 9.2             | hsa-miR-9*     | 20              | hsa-miR-9-3p   |
| MIMAT0000092     | 9.2             | hsa-miR-92     | 20              | hsa-miR-92a-3p |
| MIMAT0003218     | 9.2             | hsa-miR-92b    | 20              | hsa-miR-92b-3p |
| MIMAT0000093     | 9.2             | hsa-miR-93     | 20              | hsa-miR-93-5p  |
| MIMAT0000094     | 9.2             | hsa-miR-95     | 20              | hsa-miR-95-3p  |
| MIMAT0000095     | 9.2             | hsa-miR-96     | 20              | hsa-miR-96-5p  |

**Supplementary Table S1 (continued)**

| Accession Number | miRBase release | Name        | miRBase release | Name           |
|------------------|-----------------|-------------|-----------------|----------------|
| MIMAT0000096     | 9.2             | hsa-miR-98  | 20              | hsa-miR-98-5p  |
| MIMAT0000097     | 9.2             | hsa-miR-99a | 20              | hsa-miR-99a-5p |
| MIMAT0000689     | 9.2             | hsa-miR-99b | 20              | hsa-miR-99b-5p |

**Supplementary Table S2: Annotation of mature miRNA from *Qiagen miScript Primer Assays* in *Homo sapiens***

| miScript Primer Assay Target Sequence | Cat. no. Qiagen         | miRBase release | Accession Number | Name         |                 |
|---------------------------------------|-------------------------|-----------------|------------------|--------------|-----------------|
| <i>target assays</i>                  |                         |                 |                  |              |                 |
| Hs_let-7a_2                           | UGAGGUAGUAGGUUGUAUAGUU  | MS00031220      | 20               | MIMAT0000062 | hsa-let-7a-5p   |
| Hs_let-7b_1                           | UGAGGUAGUAGGUUGUGUGUU   | MS00003122      | 20               | MIMAT0000063 | hsa-let-7b-5p   |
| Hs_let-7c_1                           | UGAGGUAGUAGGUUGUAUGUU   | MS00003129      | 20               | MIMAT0000064 | hsa-let-7c-5p   |
| Hs_let-7d_1                           | AGAGGUAGUAGGUUGCAUAGUU  | MS00003136      | 20               | MIMAT0000065 | hsa-let-7d-5p   |
| Hs_let-7f_1                           | UGAGGUAGUAGAUUGUAUAGUU  | MS00006489      | 20               | MIMAT0000067 | hsa-let-7f-5p   |
| Hs_let-7g_2                           | UGAGGUAGUAGUUUGUACAGUU  | MS00008337      | 20               | MIMAT0000414 | hsa-let-7g-5p   |
| Hs_let-7i_1                           | UGAGGUAGUAGUUUGUGCUGUU  | MS00003157      | 20               | MIMAT0000415 | hsa-let-7i-5p   |
| Hs_miR-19a_1                          | UGUGCAAUUCUAUGCAAACUGA  | MS00003192      | 20               | MIMAT0000073 | hsa-miR-19a-3p  |
| Hs_miR-19b_2                          | UGUGCAAUCCAUGCAAACUGA   | MS00031584      | 20               | MIMAT0000074 | hsa-miR-19b-3p  |
| Hs_miR-29a_1                          | UAGCACCAUCUGAAAUCGGUUA  | MS00003262      | 20               | MIMAT0000086 | hsa-miR-29a-3p  |
| Hs_miR-29b_1                          | UAGCACCAUUUGAAAUCAGUGUU | MS00006566      | 20               | MIMAT0000100 | hsa-miR-29b-3p  |
| Hs_miR-29c_1                          | UAGCACCAUUUGAAAUCGGUUA  | MS00003269      | 20               | MIMAT0000681 | hsa-miR-29c-3p  |
| Hs_miR-34a_1                          | UGGCAGUGUCUUAGCUGGUUGU  | MS00003318      | 20               | MIMAT0000255 | hsa-miR-34a-5p  |
| Hs_miR-34c_1                          | AGGCAGUGUAGUUAGCUGAUUGC | MS00003332      | 20               | MIMAT0000686 | hsa-miR-34c-5p  |
| Hs_miR-449_1                          | UGGCAGUGUAUUGUUAGCUGGU  | MS00004228      | 20               | MIMAT0001541 | hsa-miR-449a    |
| Hs_miR-494_2                          | UGAAACAUACACGGGAAACCUC  | MS00033754      | 20               | MIMAT0002816 | hsa-miR-494-3p  |
| Hs_miR-98_1                           | UGAGGUAGUAAGUUGUAUUGUU  | MS00003367      | 20               | MIMAT0000096 | hsa-miR-98-5p   |
| <i>reference assays</i>               |                         |                 |                  |              |                 |
| Hs_miR-125a_1                         | UCCUGAGACCCUUUAACCUGUGA | MS00003423      | 20               | MIMAT0000443 | hsa-miR-125a-5p |
| Hs_miR-423-5p_1                       | UGAGGGGCAGAGAGCGAGACUUU | MS00009681      | 20               | MIMAT0004748 | hsa-miR-423-5p  |
| Hs_miR-99b_2                          | CACCCGUAGAACCGACCUUGC   | MS00032165      | 20               | MIMAT0000689 | hsa-miR-99b-5p  |



**Supplementary Table S3: Annotation update of mature miRNA from *Taqman Assays Rodent Pool set v2.0* in *Mus musculus***

# the seed sequence has changed for 3 miRNAs

# the seed sequence was not known in miRbase release v10 for 109 miRNAs

# the seed sequence was not changed for 394 miRNAs

| Accession Number | miRBase release | name          | miRBase release | name            |
|------------------|-----------------|---------------|-----------------|-----------------|
| MIMAT0000521     | 10              | mmu-let-7a    | 20              | mmu-let-7a-5p   |
| MIMAT0000522     | 10              | mmu-let-7b    | 20              | mmu-let-7b-5p   |
| MIMAT0004621     | 10              | mmu-let-7b*   | 20              | mmu-let-7b-3p   |
| MIMAT0000523     | 10              | mmu-let-7c    | 20              | mmu-let-7c-5p   |
| MIMAT0004622     | 10              | mmu-let-7c-1* | 20              | mmu-let-7c-1-3p |
| MIMAT0000383     | 10              | mmu-let-7d    | 20              | mmu-let-7d-5p   |
| MIMAT0000384     | 10              | mmu-let-7d*   | 20              | mmu-let-7d-3p   |
| MIMAT0000524     | 10              | mmu-let-7e    | 20              | mmu-let-7e-5p   |
| MIMAT0000525     | 10              | mmu-let-7f    | 20              | mmu-let-7f-5p   |
| MIMAT0004623     | 10              | mmu-let-7f*   | 20              | mmu-let-7f-1-3p |
| MIMAT0000121     | 10              | mmu-let-7g    | 20              | mmu-let-7g-5p   |
| MIMAT0004519     | 10              | mmu-let-7g*   | 20              | mmu-let-7g-3p   |
| MIMAT0000122     | 10              | mmu-let-7i    | 20              | mmu-let-7i-5p   |
| MIMAT0004520     | 10              | mmu-let-7i*   | 20              | mmu-let-7i-3p   |
| MIMAT0000123     | 10              | mmu-miR-1     | 20              | mmu-miR-1a-3p   |
| MIMAT0000655     | 10              | mmu-miR-100   | 20              | mmu-miR-100-5p  |
| MIMAT0000133     | 10              | mmu-miR-101a  | 20              | mmu-miR-101a-3p |
| MIMAT0004526     | 10              | mmu-miR-101a* | 20              | mmu-miR-101a-5p |
| MIMAT0000616     | 10              | mmu-miR-101b  | 20              | mmu-miR-101b-3p |
| MIMAT0000546     | 10              | mmu-miR-103   | 20              | mmu-miR-103-3p  |
| MIMAT0004856     | 10              | mmu-miR-105   | 20              | mmu-miR-105     |
| MIMAT0000385     | 10              | mmu-miR-106a  | 20              | mmu-miR-106a-5p |
| MIMAT0000386     | 10              | mmu-miR-106b  | 20              | mmu-miR-106b-5p |
| MIMAT0004582     | 10              | mmu-miR-106b* | 20              | mmu-miR-106b-3p |
| MIMAT0000647     | 10              | mmu-miR-107   | 20              | mmu-miR-107-3p  |
| MIMAT0000648     | 10              | mmu-miR-10a   | 20              | mmu-miR-10a-5p  |
| MIMAT0004659     | 10              | mmu-miR-10a*  | 20              | mmu-miR-10a-3p  |
| MIMAT0000208     | 10              | mmu-miR-10b   | 20              | mmu-miR-10b-5p  |
| MIMAT0004538     | 10              | mmu-miR-10b*  | 20              | mmu-miR-10b-3p  |
| MIMAT0000246     | 10              | mmu-miR-122   | 20              | mmu-miR-122-5p  |

**Supplementary Table S3 (continued)**

| Accession Number | miRBase release | name            | miRBase release | name              |
|------------------|-----------------|-----------------|-----------------|-------------------|
| MIMAT0000134     | 10              | mmu-miR-124     | 20              | mmu-miR-124-3p    |
| MIMAT0004527     | 10              | mmu-miR-124*    | 20              | mmu-miR-124-5p    |
| MIMAT0004528     | 10              | mmu-miR-125a-3p | 20              | mmu-miR-125a-3p   |
| MIMAT0000135     | 10              | mmu-miR-125a-5p | 20              | mmu-miR-125a-5p   |
| MIMAT0004669     | 10              | mmu-miR-125b-3p | 20              | mmu-miR-125b-1-3p |
| MIMAT0000136     | 10              | mmu-miR-125b-5p | 20              | mmu-miR-125b-5p   |
| MIMAT0004529     | 10              | mmu-miR-125b*   | 20              | mmu-miR-125b-2-3p |
| MIMAT0000138     | 10              | mmu-miR-126-3p  | 20              | mmu-miR-126a-3p   |
| MIMAT0000137     | 10              | mmu-miR-126-5p  | 20              | mmu-miR-126a-5p   |
| MIMAT0000139     | 10              | mmu-miR-127     | 20              | mmu-miR-127-3p    |
| MIMAT0004530     | 10              | mmu-miR-127*    | 20              | mmu-miR-127-5p    |
| MIMAT0000140     | 10              | mmu-miR-128a    | 20              | mmu-miR-128-3p    |
| MIMAT0000544     | 10              | mmu-miR-129-3p  | 20              | mmu-miR-129-2-3p  |
| MIMAT0000209     | 10              | mmu-miR-129-5p  | 20              | mmu-miR-129-5p    |
| MIMAT0000141     | 10              | mmu-miR-130a    | 20              | mmu-miR-130a-3p   |
| MIMAT0000387     | 10              | mmu-miR-130b    | 20              | mmu-miR-130b-3p   |
| MIMAT0004583     | 10              | mmu-miR-130b*   | 20              | mmu-miR-130b-5p   |
| MIMAT0000144     | 10              | mmu-miR-132     | 20              | mmu-miR-132-3p    |
| MIMAT0000145     | 10              | mmu-miR-133a    | 20              | mmu-miR-133a-3p   |
| MIMAT0003473     | 10              | mmu-miR-133a*   | 20              | mmu-miR-133a-5p   |
| MIMAT0000769     | 10              | mmu-miR-133b    | 20              | mmu-miR-133b-3p   |
| MIMAT0000146     | 10              | mmu-miR-134     | 20              | mmu-miR-134-5p    |
| MIMAT0000147     | 10              | mmu-miR-135a    | 20              | mmu-miR-135a-5p   |
| MIMAT0000612     | 10              | mmu-miR-135b    | 20              | mmu-miR-135b-5p   |
| MIMAT0000148     | 10              | mmu-miR-136     | 20              | mmu-miR-136-5p    |
| MIMAT0004532     | 10              | mmu-miR-136*    | 20              | mmu-miR-136-3p    |
| MIMAT0000149     | 10              | mmu-miR-137     | 20              | mmu-miR-137-3p    |
| MIMAT0000150     | 10              | mmu-miR-138     | 20              | mmu-miR-138-5p    |
| MIMAT0004668     | 10              | mmu-miR-138*    | 20              | mmu-miR-138-1-3p  |
| MIMAT0004662     | 10              | mmu-miR-139-3p  | 20              | mmu-miR-139-3p    |
| MIMAT0000656     | 10              | mmu-miR-139-5p  | 20              | mmu-miR-139-5p    |
| MIMAT0000151     | 10              | mmu-miR-140     | 20              | mmu-miR-140-5p    |
| MIMAT0000152     | 10              | mmu-miR-140*    | 20              | mmu-miR-140-3p    |

**Supplementary Table S3 (continued)**

| Accession Number | miRBase release | name           | miRBase release | name            |
|------------------|-----------------|----------------|-----------------|-----------------|
| MIMAT0000153     | 10              | mmu-miR-141    | 20              | mmu-miR-141-3p  |
| MIMAT0004533     | 10              | mmu-miR-141*   | 20              | mmu-miR-141-5p  |
| MIMAT0000155     | 10              | mmu-miR-142-3p | 20              | mmu-miR-142-3p  |
| MIMAT0000154     | 10              | mmu-miR-142-5p | 20              | mmu-miR-142-5p  |
| MIMAT0000247     | 10              | mmu-miR-143    | 20              | mmu-miR-143-3p  |
| MIMAT0000157     | 10              | mmu-miR-145    | 20              | mmu-miR-145a-5p |
| MIMAT0004534     | 10              | mmu-miR-145*   | 20              | mmu-miR-145a-3p |
| MIMAT0000158     | 10              | mmu-miR-146a   | 20              | mmu-miR-146a-5p |
| MIMAT0003475     | 10              | mmu-miR-146b   | 20              | mmu-miR-146b-5p |
| MIMAT0004826     | 10              | mmu-miR-146b*  | 20              | mmu-miR-146b-3p |
| MIMAT0004857     | 10              | mmu-miR-147    | 20              | mmu-miR-147-3p  |
| MIMAT0000516     | 10              | mmu-miR-148a   | 20              | mmu-miR-148a-3p |
| MIMAT0004617     | 10              | mmu-miR-148a*  | 20              | mmu-miR-148a-5p |
| MIMAT0000580     | 10              | mmu-miR-148b   | 20              | mmu-miR-148b-3p |
| MIMAT0000159     | 10              | mmu-miR-149    | 20              | mmu-miR-149-5p  |
| MIMAT0000160     | 10              | mmu-miR-150    | 20              | mmu-miR-150-5p  |
| MIMAT0004535     | 10              | mmu-miR-150*   | 20              | mmu-miR-150-3p  |
| MIMAT0000161     | 10              | mmu-miR-151-3p | 20              | mmu-miR-151-3p  |
| MIMAT0000162     | 10              | mmu-miR-152    | 20              | mmu-miR-152-3p  |
| MIMAT0000163     | 10              | mmu-miR-153    | 20              | mmu-miR-153-3p  |
| MIMAT0000164     | 10              | mmu-miR-154    | 20              | mmu-miR-154-5p  |
| MIMAT0004537     | 10              | mmu-miR-154*   | 20              | mmu-miR-154-3p  |
| MIMAT0000165     | 10              | mmu-miR-155    | 20              | mmu-miR-155-5p  |
| MIMAT0000526     | 10              | mmu-miR-15a    | 20              | mmu-miR-15a-5p  |
| MIMAT0004624     | 10              | mmu-miR-15a*   | 20              | mmu-miR-15a-3p  |
| MIMAT0000124     | 10              | mmu-miR-15b    | 20              | mmu-miR-15b-5p  |
| MIMAT0004521     | 10              | mmu-miR-15b*   | 20              | mmu-miR-15b-3p  |
| MIMAT0000527     | 10              | mmu-miR-16     | 20              | mmu-miR-16-5p   |
| MIMAT0004625     | 10              | mmu-miR-16*    | 20              | mmu-miR-16-1-3p |
| MIMAT0000649     | 10              | mmu-miR-17     | 20              | mmu-miR-17-5p   |
| MIMAT0000650     | 10              | mmu-miR-17*    | 20              | mmu-miR-17-3p   |
| MIMAT0000210     | 10              | mmu-miR-181a   | 20              | mmu-miR-181a-5p |
| MIMAT0000674     | 10              | mmu-miR-181c   | 20              | mmu-miR-181c-5p |

**Supplementary Table S3 (continued)**

| Accession Number | miRBase release | name            | miRBase release | name              |
|------------------|-----------------|-----------------|-----------------|-------------------|
| MIMAT0000211     | 10              | mmu-miR-182     | 20              | mmu-miR-182-5p    |
| MIMAT0000212     | 10              | mmu-miR-183     | 20              | mmu-miR-183-5p    |
| MIMAT0004539     | 10              | mmu-miR-183*    | 20              | mmu-miR-183-3p    |
| MIMAT0000213     | 10              | mmu-miR-184     | 20              | mmu-miR-184-3p    |
| MIMAT0000214     | 10              | mmu-miR-185     | 20              | mmu-miR-185-5p    |
| MIMAT0000215     | 10              | mmu-miR-186     | 20              | mmu-miR-186-5p    |
| MIMAT0004540     | 10              | mmu-miR-186*    | 20              | mmu-miR-186-3p    |
| MIMAT0000216     | 10              | mmu-miR-187     | 20              | mmu-miR-187-3p    |
| MIMAT0004541     | 10              | mmu-miR-188-3p  | 20              | mmu-miR-188-3p    |
| MIMAT0000217     | 10              | mmu-miR-188-5p  | 20              | mmu-miR-188-5p    |
| MIMAT0000528     | 10              | mmu-miR-18a     | 20              | mmu-miR-18a-5p    |
| MIMAT0004626     | 10              | mmu-miR-18a*    | 20              | mmu-miR-18a-3p    |
| MIMAT0004858     | 10              | mmu-miR-18b     | 20              | mmu-miR-18b-5p    |
| MIMAT0000220     | 10              | mmu-miR-190     | 20              | mmu-miR-190a-5p   |
| MIMAT0004852     | 10              | mmu-miR-190b    | 20              | mmu-miR-190b-5p   |
| MIMAT0000221     | 10              | mmu-miR-191     | 20              | mmu-miR-191-5p    |
| MIMAT0004542     | 10              | mmu-miR-191*    | 20              | mmu-miR-191-3p    |
| MIMAT0000517     | 10              | mmu-miR-192     | 20              | mmu-miR-192-5p    |
| MIMAT0000223     | 10              | mmu-miR-193     | 20              | mmu-miR-193a-3p   |
| MIMAT0004544     | 10              | mmu-miR-193*    | 20              | mmu-miR-193a-5p   |
| MIMAT0004859     | 10              | mmu-miR-193b    | 20              | mmu-miR-193b-3p   |
| MIMAT0000224     | 10              | mmu-miR-194     | 20              | mmu-miR-194-5p    |
| MIMAT0000225     | 10              | mmu-miR-195     | 20              | mmu-miR-195a-5p   |
| MIMAT0004618     | 10              | mmu-miR-196a*   | 20              | mmu-miR-196a-2-3p |
| MIMAT0001081     | 10              | mmu-miR-196b    | 20              | mmu-miR-196b-5p   |
| MIMAT0000229     | 10              | mmu-miR-199a-5p | 20              | mmu-miR-199a-5p   |
| MIMAT0000672     | 10              | mmu-miR-199b*   | 20              | mmu-miR-199b-5p   |
| MIMAT0000651     | 10              | mmu-miR-19a     | 20              | mmu-miR-19a-3p    |
| MIMAT0004660     | 10              | mmu-miR-19a*    | 20              | mmu-miR-19a-5p    |
| MIMAT0000513     | 10              | mmu-miR-19b     | 20              | mmu-miR-19b-3p    |
| MIMAT0000519     | 10              | mmu-miR-200a    | 20              | mmu-miR-200a-3p   |
| MIMAT0004619     | 10              | mmu-miR-200a*   | 20              | mmu-miR-200a-5p   |
| MIMAT0000233     | 10              | mmu-miR-200b    | 20              | mmu-miR-200b-3p   |

**Supplementary Table S3 (continued)**

| Accession Number | miRBase release | name           | miRBase release | name             |
|------------------|-----------------|----------------|-----------------|------------------|
| MIMAT0004545     | 10              | mmu-miR-200b*  | 20              | mmu-miR-200b-5p  |
| MIMAT0000657     | 10              | mmu-miR-200c   | 20              | mmu-miR-200c-3p  |
| MIMAT0004663     | 10              | mmu-miR-200c*  | 20              | mmu-miR-200c-5p  |
| MIMAT0000234     | 10              | mmu-miR-201    | 20              | mmu-miR-201-5p   |
| MIMAT0000235     | 10              | mmu-miR-202-3p | 20              | mmu-miR-202-3p   |
| MIMAT0004546     | 10              | mmu-miR-202-5p | 20              | mmu-miR-202-5p   |
| MIMAT0004547     | 10              | mmu-miR-203*   | 20              | mmu-miR-203-5p   |
| MIMAT0000237     | 10              | mmu-miR-204    | 20              | mmu-miR-204-5p   |
| MIMAT0000238     | 10              | mmu-miR-205    | 20              | mmu-miR-205-5p   |
| MIMAT0000239     | 10              | mmu-miR-206    | 20              | mmu-miR-206-3p   |
| MIMAT0000240     | 10              | mmu-miR-207    | 20              | mmu-miR-207      |
| MIMAT0000520     | 10              | mmu-miR-208    | 20              | mmu-miR-208a-3p  |
| MIMAT0004939     | 10              | mmu-miR-208b   | 20              | mmu-miR-208b-3p  |
| MIMAT0000529     | 10              | mmu-miR-20a    | 20              | mmu-miR-20a-5p   |
| MIMAT0004627     | 10              | mmu-miR-20a*   | 20              | mmu-miR-20a-3p   |
| MIMAT0003187     | 10              | mmu-miR-20b    | 20              | mmu-miR-20b-5p   |
| MIMAT0004788     | 10              | mmu-miR-20b*   | 20              | mmu-miR-20b-3p   |
| MIMAT0000530     | 10              | mmu-miR-21     | 20              | mmu-miR-21a-5p   |
| MIMAT0004628     | 10              | mmu-miR-21*    | 20              | mmu-miR-21a-3p   |
| MIMAT0000658     | 10              | mmu-miR-210    | 20              | mmu-miR-210-3p   |
| MIMAT0000668     | 10              | mmu-miR-211    | 20              | mmu-miR-211-5p   |
| MIMAT0000659     | 10              | mmu-miR-212    | 20              | mmu-miR-212-3p   |
| MIMAT0000661     | 10              | mmu-miR-214    | 20              | mmu-miR-214-3p   |
| MIMAT0004664     | 10              | mmu-miR-214*   | 20              | mmu-miR-214-5p   |
| MIMAT0000904     | 10              | mmu-miR-215    | 20              | mmu-miR-215-5p   |
| MIMAT0000662     | 10              | mmu-miR-216a   | 20              | mmu-miR-216a-5p  |
| MIMAT0003729     | 10              | mmu-miR-216b   | 20              | mmu-miR-216b-5p  |
| MIMAT0000679     | 10              | mmu-miR-217    | 20              | mmu-miR-217-5p   |
| MIMAT0000663     | 10              | mmu-miR-218    | 20              | mmu-miR-218-5p   |
| MIMAT0004665     | 10              | mmu-miR-218-1* | 20              | mmu-miR-218-1-3p |
| MIMAT0005444     | 10              | mmu-miR-218-2* | 20              | mmu-miR-218-2-3p |
| MIMAT0000664     | 10              | mmu-miR-219    | 20              | mmu-miR-219a-5p  |
| MIMAT0000531     | 10              | mmu-miR-22     | 20              | mmu-miR-22-3p    |

**Supplementary Table S3 (continued)**

| Accession Number | miRBase release | name            | miRBase release | name            |
|------------------|-----------------|-----------------|-----------------|-----------------|
| MIMAT0004629     | 10              | mmu-miR-22*     | 20              | mmu-miR-22-5p   |
| MIMAT0000669     | 10              | mmu-miR-221     | 20              | mmu-miR-221-3p  |
| MIMAT0000670     | 10              | mmu-miR-222     | 20              | mmu-miR-222-3p  |
| MIMAT0000671     | 10              | mmu-miR-224     | 20              | mmu-miR-224-5p  |
| MIMAT0000532     | 10              | mmu-miR-23a     | 20              | mmu-miR-23a-3p  |
| MIMAT0000125     | 10              | mmu-miR-23b     | 20              | mmu-miR-23b-3p  |
| MIMAT0000219     | 10              | mmu-miR-24      | 20              | mmu-miR-24-3p   |
| MIMAT0005440     | 10              | mmu-miR-24-2*   | 20              | mmu-miR-24-2-5p |
| MIMAT0000652     | 10              | mmu-miR-25      | 20              | mmu-miR-25-3p   |
| MIMAT0000533     | 10              | mmu-miR-26a     | 20              | mmu-miR-26a-5p  |
| MIMAT0000534     | 10              | mmu-miR-26b     | 20              | mmu-miR-26b-5p  |
| MIMAT0004630     | 10              | mmu-miR-26b*    | 20              | mmu-miR-26b-3p  |
| MIMAT0000537     | 10              | mmu-miR-27a     | 20              | mmu-miR-27a-3p  |
| MIMAT0004633     | 10              | mmu-miR-27a*    | 20              | mmu-miR-27a-5p  |
| MIMAT0000126     | 10              | mmu-miR-27b     | 20              | mmu-miR-27b-3p  |
| MIMAT0004522     | 10              | mmu-miR-27b*    | 20              | mmu-miR-27b-5p  |
| MIMAT0000653     | 10              | mmu-miR-28      | 20              | mmu-miR-28a-5p  |
| MIMAT0004661     | 10              | mmu-miR-28*     | 20              | mmu-miR-28a-3p  |
| MIMAT0004572     | 10              | mmu-miR-290-3p  | 20              | mmu-miR-290a-3p |
| MIMAT0000366     | 10              | mmu-miR-290-5p  | 20              | mmu-miR-290a-5p |
| MIMAT0000368     | 10              | mmu-miR-291a-3p | 20              | mmu-miR-291a-3p |
| MIMAT0000367     | 10              | mmu-miR-291a-5p | 20              | mmu-miR-291a-5p |
| MIMAT0003190     | 10              | mmu-miR-291b-3p | 20              | mmu-miR-291b-3p |
| MIMAT0003189     | 10              | mmu-miR-291b-5p | 20              | mmu-miR-291b-5p |
| MIMAT0000370     | 10              | mmu-miR-292-3p  | 20              | mmu-miR-292-3p  |
| MIMAT0000369     | 10              | mmu-miR-292-5p  | 20              | mmu-miR-292-5p  |
| MIMAT0000371     | 10              | mmu-miR-293     | 20              | mmu-miR-293-3p  |
| MIMAT0004573     | 10              | mmu-miR-293*    | 20              | mmu-miR-293-5p  |
| MIMAT0000372     | 10              | mmu-miR-294     | 20              | mmu-miR-294-3p  |
| MIMAT0004574     | 10              | mmu-miR-294*    | 20              | mmu-miR-294-5p  |
| MIMAT0000373     | 10              | mmu-miR-295     | 20              | mmu-miR-295-3p  |
| MIMAT0004575     | 10              | mmu-miR-295*    | 20              | mmu-miR-295-5p  |
| MIMAT0004576     | 10              | mmu-miR-296-3p  | 20              | mmu-miR-296-3p  |

**Supplementary Table S3 (continued)**

| Accession Number | miRBase release | name            | miRBase release | name             |
|------------------|-----------------|-----------------|-----------------|------------------|
| MIMAT0000374     | 10              | mmu-miR-296-5p  | 20              | mmu-miR-296-5p   |
| MIMAT0003480     | 10              | mmu-miR-297b-5p | 20              | mmu-miR-297b-5p  |
| MIMAT0004865     | 10              | mmu-miR-297c    | 20              | mmu-miR-297c-5p  |
| MIMAT0000376     | 10              | mmu-miR-298     | 20              | mmu-miR-298-5p   |
| MIMAT0004577     | 10              | mmu-miR-299     | 20              | mmu-miR-299a-3p  |
| MIMAT0000377     | 10              | mmu-miR-299*    | 20              | mmu-miR-299a-5p  |
| MIMAT0000535     | 10              | mmu-miR-29a     | 20              | mmu-miR-29a-3p   |
| MIMAT0004631     | 10              | mmu-miR-29a*    | 20              | mmu-miR-29a-5p   |
| MIMAT0000127     | 10              | mmu-miR-29b     | 20              | mmu-miR-29b-3p   |
| MIMAT0004523     | 10              | mmu-miR-29b*    | 20              | mmu-miR-29b-1-5p |
| MIMAT0004632     | 10              | mmu-miR-29c*    | 20              | mmu-miR-29c-5p   |
| MIMAT0000378     | 10              | mmu-miR-300     | 20              | mmu-miR-300-3p   |
| MIMAT0004578     | 10              | mmu-miR-300*    | 20              | mmu-miR-300-5p   |
| MIMAT0000379     | 10              | mmu-miR-301a    | 20              | mmu-miR-301a-3p  |
| MIMAT0004186     | 10              | mmu-miR-301b    | 20              | mmu-miR-301b-3p  |
| MIMAT0000380     | 10              | mmu-miR-302a    | 20              | mmu-miR-302a-3p  |
| MIMAT0004579     | 10              | mmu-miR-302a*   | 20              | mmu-miR-302a-5p  |
| MIMAT0003374     | 10              | mmu-miR-302b    | 20              | mmu-miR-302b-3p  |
| MIMAT0003373     | 10              | mmu-miR-302b*   | 20              | mmu-miR-302b-5p  |
| MIMAT0003376     | 10              | mmu-miR-302c    | 20              | mmu-miR-302c-3p  |
| MIMAT0003375     | 10              | mmu-miR-302c*   | 20              | mmu-miR-302c-5p  |
| MIMAT0003377     | 10              | mmu-miR-302d    | 20              | mmu-miR-302d-3p  |
| MIMAT0000128     | 10              | mmu-miR-30a     | 20              | mmu-miR-30a-5p   |
| MIMAT0000129     | 10              | mmu-miR-30a*    | 20              | mmu-miR-30a-3p   |
| MIMAT0004524     | 10              | mmu-miR-30b*    | 20              | mmu-miR-30b-3p   |
| MIMAT0000514     | 10              | mmu-miR-30c     | 20              | mmu-miR-30c-5p   |
| MIMAT0004616     | 10              | mmu-miR-30c-1*  | 20              | mmu-miR-30c-1-3p |
| MIMAT0005438     | 10              | mmu-miR-30c-2*  | 20              | mmu-miR-30c-2-3p |
| MIMAT0000515     | 10              | mmu-miR-30d     | 20              | mmu-miR-30d-5p   |
| MIMAT0000248     | 10              | mmu-miR-30e     | 20              | mmu-miR-30e-5p   |
| MIMAT0000249     | 10              | mmu-miR-30e*    | 20              | mmu-miR-30e-3p   |
| MIMAT0000538     | 10              | mmu-miR-31      | 20              | mmu-miR-31-5p    |
| MIMAT0004634     | 10              | mmu-miR-31*     | 20              | mmu-miR-31-3p    |

**Supplementary Table S3 (continued)**

| Accession Number | miRBase release | name           | miRBase release | name           |
|------------------|-----------------|----------------|-----------------|----------------|
| MIMAT0000654     | 10              | mmu-miR-32     | 20              | mmu-miR-32-5p  |
| MIMAT0000666     | 10              | mmu-miR-320    | 20              | mmu-miR-320-3p |
| MIMAT0000548     | 10              | mmu-miR-322    | 20              | mmu-miR-322-5p |
| MIMAT0000549     | 10              | mmu-miR-322*   | 20              | mmu-miR-322-3p |
| MIMAT0000551     | 10              | mmu-miR-323-3p | 20              | mmu-miR-323-3p |
| MIMAT0000556     | 10              | mmu-miR-324-3p | 20              | mmu-miR-324-3p |
| MIMAT0000555     | 10              | mmu-miR-324-5p | 20              | mmu-miR-324-5p |
| MIMAT0004640     | 10              | mmu-miR-325    | 20              | mmu-miR-325-3p |
| MIMAT0000558     | 10              | mmu-miR-325*   | 20              | mmu-miR-325-5p |
| MIMAT0000559     | 10              | mmu-miR-326    | 20              | mmu-miR-326-3p |
| MIMAT0004867     | 10              | mmu-miR-327    | 20              | mmu-miR-327    |
| MIMAT0000565     | 10              | mmu-miR-328    | 20              | mmu-miR-328-3p |
| MIMAT0000567     | 10              | mmu-miR-329    | 20              | mmu-miR-329-3p |
| MIMAT0000667     | 10              | mmu-miR-33     | 20              | mmu-miR-33-5p  |
| MIMAT0004666     | 10              | mmu-miR-33*    | 20              | mmu-miR-33-3p  |
| MIMAT0004642     | 10              | mmu-miR-330    | 20              | mmu-miR-330-5p |
| MIMAT0000569     | 10              | mmu-miR-330*   | 20              | mmu-miR-330-3p |
| MIMAT0000571     | 10              | mmu-miR-331-3p | 20              | mmu-miR-331-3p |
| MIMAT0004643     | 10              | mmu-miR-331-5p | 20              | mmu-miR-331-5p |
| MIMAT0004704     | 10              | mmu-miR-335-3p | 20              | mmu-miR-335-3p |
| MIMAT0000766     | 10              | mmu-miR-335-5p | 20              | mmu-miR-335-5p |
| MIMAT0000578     | 10              | mmu-miR-337-3p | 20              | mmu-miR-337-3p |
| MIMAT0004644     | 10              | mmu-miR-337-5p | 20              | mmu-miR-337-5p |
| MIMAT0000582     | 10              | mmu-miR-338-3p | 20              | mmu-miR-338-3p |
| MIMAT0004649     | 10              | mmu-miR-339-3p | 20              | mmu-miR-339-3p |
| MIMAT0000584     | 10              | mmu-miR-339-5p | 20              | mmu-miR-339-5p |
| MIMAT0000586     | 10              | mmu-miR-340-3p | 20              | mmu-miR-340-3p |
| MIMAT0004651     | 10              | mmu-miR-340-5p | 20              | mmu-miR-340-5p |
| MIMAT0000590     | 10              | mmu-miR-342-3p | 20              | mmu-miR-342-3p |
| MIMAT0004653     | 10              | mmu-miR-342-5p | 20              | mmu-miR-342-5p |
| MIMAT0004868     | 10              | mmu-miR-343    | 20              | mmu-miR-343    |
| MIMAT0000593     | 10              | mmu-miR-344    | 20              | mmu-miR-344-3p |
| MIMAT0004656     | 10              | mmu-miR-345-3p | 20              | mmu-miR-345-3p |



**Supplementary Table S3 (continued)**

| Accession Number | miRBase release | name           | miRBase release | name            |
|------------------|-----------------|----------------|-----------------|-----------------|
| MIMAT0000595     | 10              | mmu-miR-345-5p | 20              | mmu-miR-345-5p  |
| MIMAT0000597     | 10              | mmu-miR-346    | 20              | mmu-miR-346-5p  |
| MIMAT0004581     | 10              | mmu-miR-34b-3p | 20              | mmu-miR-34b-3p  |
| MIMAT0000382     | 10              | mmu-miR-34b-5p | 20              | mmu-miR-34b-5p  |
| MIMAT0000381     | 10              | mmu-miR-34c    | 20              | mmu-miR-34c-5p  |
| MIMAT0004580     | 10              | mmu-miR-34c*   | 20              | mmu-miR-34c-3p  |
| MIMAT0000605     | 10              | mmu-miR-350    | 20              | mmu-miR-350-3p  |
| MIMAT0000609     | 10              | mmu-miR-351    | 20              | mmu-miR-351-5p  |
| MIMAT0000704     | 10              | mmu-miR-361    | 20              | mmu-miR-361-5p  |
| MIMAT0004684     | 10              | mmu-miR-362-3p | 20              | mmu-miR-362-3p  |
| MIMAT0000706     | 10              | mmu-miR-362-5p | 20              | mmu-miR-362-5p  |
| MIMAT0000708     | 10              | mmu-miR-363    | 20              | mmu-miR-363-3p  |
| MIMAT0000711     | 10              | mmu-miR-365    | 20              | mmu-miR-365-3p  |
| MIMAT0003181     | 10              | mmu-miR-367    | 20              | mmu-miR-367-3p  |
| MIMAT0003186     | 10              | mmu-miR-369-3p | 20              | mmu-miR-369-3p  |
| MIMAT0003185     | 10              | mmu-miR-369-5p | 20              | mmu-miR-369-5p  |
| MIMAT0001095     | 10              | mmu-miR-370    | 20              | mmu-miR-370-3p  |
| MIMAT0003727     | 10              | mmu-miR-374    | 20              | mmu-miR-374b-5p |
| MIMAT0003728     | 10              | mmu-miR-374*   | 20              | mmu-miR-374b-3p |
| MIMAT0000739     | 10              | mmu-miR-375    | 20              | mmu-miR-375-3p  |
| MIMAT0000740     | 10              | mmu-miR-376a   | 20              | mmu-miR-376a-3p |
| MIMAT0003387     | 10              | mmu-miR-376a*  | 20              | mmu-miR-376a-5p |
| MIMAT0001092     | 10              | mmu-miR-376b   | 20              | mmu-miR-376b-3p |
| MIMAT0003388     | 10              | mmu-miR-376b*  | 20              | mmu-miR-376b-5p |
| MIMAT0003183     | 10              | mmu-miR-376c   | 20              | mmu-miR-376c-3p |
| MIMAT0005295     | 10              | mmu-miR-376c*  | 20              | mmu-miR-376c-5p |
| MIMAT0000741     | 10              | mmu-miR-377    | 20              | mmu-miR-377-3p  |
| MIMAT0003151     | 10              | mmu-miR-378    | 20              | mmu-miR-378a-3p |
| MIMAT0000742     | 10              | mmu-miR-378*   | 20              | mmu-miR-378a-5p |
| MIMAT0000743     | 10              | mmu-miR-379    | 20              | mmu-miR-379-5p  |
| MIMAT0000745     | 10              | mmu-miR-380-3p | 20              | mmu-miR-380-3p  |
| MIMAT0000744     | 10              | mmu-miR-380-5p | 20              | mmu-miR-380-5p  |
| MIMAT0000746     | 10              | mmu-miR-381    | 20              | mmu-miR-381-3p  |

**Supplementary Table S3 (continued)**

| Accession Number | miRBase release | name            | miRBase release | name              |
|------------------|-----------------|-----------------|-----------------|-------------------|
| MIMAT0000747     | 10              | mmu-miR-382     | 20              | mmu-miR-382-5p    |
| MIMAT0004691     | 10              | mmu-miR-382*    | 20              | mmu-miR-382-3p    |
| MIMAT0000748     | 10              | mmu-miR-383     | 20              | mmu-miR-383-5p    |
| MIMAT0001076     | 10              | mmu-miR-384-3p  | 20              | mmu-miR-384-3p    |
| MIMAT0004745     | 10              | mmu-miR-384-5p  | 20              | mmu-miR-384-5p    |
| MIMAT0001090     | 10              | mmu-miR-409-3p  | 20              | mmu-miR-409-3p    |
| MIMAT0004746     | 10              | mmu-miR-409-5p  | 20              | mmu-miR-409-5p    |
| MIMAT0001091     | 10              | mmu-miR-410     | 20              | mmu-miR-410-3p    |
| MIMAT0004747     | 10              | mmu-miR-411     | 20              | mmu-miR-411-5p    |
| MIMAT0001093     | 10              | mmu-miR-411*    | 20              | mmu-miR-411-3p    |
| MIMAT0001094     | 10              | mmu-miR-412     | 20              | mmu-miR-412-3p    |
| MIMAT0004825     | 10              | mmu-miR-423-5p  | 20              | mmu-miR-423-5p    |
| MIMAT0004750     | 10              | mmu-miR-425     | 20              | mmu-miR-425-5p    |
| MIMAT0001342     | 10              | mmu-miR-425*    | 20              | mmu-miR-425-3p    |
| MIMAT0001537     | 10              | mmu-miR-429     | 20              | mmu-miR-429-3p    |
| MIMAT0001418     | 10              | mmu-miR-431     | 20              | mmu-miR-431-5p    |
| MIMAT0004753     | 10              | mmu-miR-431*    | 20              | mmu-miR-431-3p    |
| MIMAT0001420     | 10              | mmu-miR-433     | 20              | mmu-miR-433-3p    |
| MIMAT0001419     | 10              | mmu-miR-433*    | 20              | mmu-miR-433-5p    |
| MIMAT0001422     | 10              | mmu-miR-434-3p  | 20              | mmu-miR-434-3p    |
| MIMAT0001421     | 10              | mmu-miR-434-5p  | 20              | mmu-miR-434-5p    |
| MIMAT0001533     | 10              | mmu-miR-448     | 20              | mmu-miR-448-3p    |
| MIMAT0001542     | 10              | mmu-miR-449a    | 20              | mmu-miR-449a-5p   |
| MIMAT0005447     | 10              | mmu-miR-449b    | 20              | mmu-miR-449b      |
| MIMAT0003460     | 10              | mmu-miR-449c    | 20              | mmu-miR-449c-5p   |
| MIMAT0004789     | 10              | mmu-miR-450a-3p | 20              | mmu-miR-450a-2-3p |
| MIMAT0001546     | 10              | mmu-miR-450a-5p | 20              | mmu-miR-450a-5p   |
| MIMAT0003511     | 10              | mmu-miR-450b-5p | 20              | mmu-miR-450b-5p   |
| MIMAT0001637     | 10              | mmu-miR-452     | 20              | mmu-miR-452-5p    |
| MIMAT0004870     | 10              | mmu-miR-453     | 20              | mmu-miR-453       |
| MIMAT0003742     | 10              | mmu-miR-455     | 20              | mmu-miR-455-3p    |
| MIMAT0003485     | 10              | mmu-miR-455*    | 20              | mmu-miR-455-5p    |
| MIMAT0002104     | 10              | mmu-miR-463*    | 20              | mmu-miR-463-5p    |

**Supplementary Table S3 (continued)**

| Accession Number | miRBase release | name            | miRBase release | name            |
|------------------|-----------------|-----------------|-----------------|-----------------|
| MIMAT0002106     | 10              | mmu-miR-465a-5p | 20              | mmu-miR-465a-5p |
| MIMAT0004871     | 10              | mmu-miR-465b-5p | 20              | mmu-miR-465b-5p |
| MIMAT0004877     | 10              | mmu-miR-466c-5p | 20              | mmu-miR-466c-5p |
| MIMAT0004931     | 10              | mmu-miR-466d-3p | 20              | mmu-miR-466d-3p |
| MIMAT0004930     | 10              | mmu-miR-466d-5p | 20              | mmu-miR-466d-5p |
| MIMAT0004884     | 10              | mmu-miR-466h    | 20              | mmu-miR-466h-5p |
| MIMAT0003409     | 10              | mmu-miR-467a    | 20              | mmu-miR-467a-5p |
| MIMAT0005448     | 10              | mmu-miR-467b    | 20              | mmu-miR-467b-5p |
| MIMAT0003478     | 10              | mmu-miR-467b*   | 20              | mmu-miR-467b-3p |
| MIMAT0004885     | 10              | mmu-miR-467c    | 20              | mmu-miR-467c-5p |
| MIMAT0004886     | 10              | mmu-miR-467d    | 20              | mmu-miR-467d-5p |
| MIMAT0004887     | 10              | mmu-miR-467d*   | 20              | mmu-miR-467d-3p |
| MIMAT0005293     | 10              | mmu-miR-467e    | 20              | mmu-miR-467e-5p |
| MIMAT0005294     | 10              | mmu-miR-467e*   | 20              | mmu-miR-467e-3p |
| MIMAT0002109     | 10              | mmu-miR-468     | 20              | mmu-miR-468-3p  |
| MIMAT0002111     | 10              | mmu-miR-470     | 20              | mmu-miR-470-5p  |
| MIMAT0004760     | 10              | mmu-miR-470*    | 20              | mmu-miR-470-3p  |
| MIMAT0002112     | 10              | mmu-miR-471     | 20              | mmu-miR-471-5p  |
| MIMAT0003120     | 10              | mmu-miR-483*    | 20              | mmu-miR-483-3p  |
| MIMAT0003127     | 10              | mmu-miR-484     | 20              | mmu-miR-484     |
| MIMAT0003128     | 10              | mmu-miR-485     | 20              | mmu-miR-485-5p  |
| MIMAT0003129     | 10              | mmu-miR-485*    | 20              | mmu-miR-485-3p  |
| MIMAT0003184     | 10              | mmu-miR-487b    | 20              | mmu-miR-487b-3p |
| MIMAT0003450     | 10              | mmu-miR-488     | 20              | mmu-miR-488-3p  |
| MIMAT0003449     | 10              | mmu-miR-488*    | 20              | mmu-miR-488-5p  |
| MIMAT0003112     | 10              | mmu-miR-489     | 20              | mmu-miR-489-3p  |
| MIMAT0003780     | 10              | mmu-miR-490     | 20              | mmu-miR-490-3p  |
| MIMAT0003486     | 10              | mmu-miR-491     | 20              | mmu-miR-491-5p  |
| MIMAT0004888     | 10              | mmu-miR-493     | 20              | mmu-miR-493-3p  |
| MIMAT0003182     | 10              | mmu-miR-494     | 20              | mmu-miR-494-3p  |
| MIMAT0003456     | 10              | mmu-miR-495     | 20              | mmu-miR-495-3p  |
| MIMAT0003738     | 10              | mmu-miR-496     | 20              | mmu-miR-496a-3p |
| MIMAT0003453     | 10              | mmu-miR-497     | 20              | mmu-miR-497-5p  |

**Supplementary Table S3 (continued)**

| Accession Number | miRBase release | name           | miRBase release | name            |
|------------------|-----------------|----------------|-----------------|-----------------|
| MIMAT0003482     | 10              | mmu-miR-499    | 20              | mmu-miR-499-5p  |
| MIMAT0003507     | 10              | mmu-miR-500    | 20              | mmu-miR-500-3p  |
| MIMAT0003509     | 10              | mmu-miR-501-3p | 20              | mmu-miR-501-3p  |
| MIMAT0003508     | 10              | mmu-miR-501-5p | 20              | mmu-miR-501-5p  |
| MIMAT0003188     | 10              | mmu-miR-503    | 20              | mmu-miR-503-5p  |
| MIMAT0004790     | 10              | mmu-miR-503*   | 20              | mmu-miR-503-3p  |
| MIMAT0004889     | 10              | mmu-miR-504    | 20              | mmu-miR-504-5p  |
| MIMAT0003513     | 10              | mmu-miR-505    | 20              | mmu-miR-505-3p  |
| MIMAT0004891     | 10              | mmu-miR-509-3p | 20              | mmu-miR-509-3p  |
| MIMAT0004890     | 10              | mmu-miR-509-5p | 20              | mmu-miR-509-5p  |
| MIMAT0004940     | 10              | mmu-miR-511    | 20              | mmu-miR-511-5p  |
| MIMAT0004781     | 10              | mmu-miR-532-3p | 20              | mmu-miR-532-3p  |
| MIMAT0002889     | 10              | mmu-miR-532-5p | 20              | mmu-miR-532-5p  |
| MIMAT0003167     | 10              | mmu-miR-540-3p | 20              | mmu-miR-540-3p  |
| MIMAT0004786     | 10              | mmu-miR-540-5p | 20              | mmu-miR-540-5p  |
| MIMAT0003170     | 10              | mmu-miR-541    | 20              | mmu-miR-541-5p  |
| MIMAT0003172     | 10              | mmu-miR-542-3p | 20              | mmu-miR-542-3p  |
| MIMAT0003171     | 10              | mmu-miR-542-5p | 20              | mmu-miR-542-5p  |
| MIMAT0003168     | 10              | mmu-miR-543    | 20              | mmu-miR-543-3p  |
| MIMAT0004941     | 10              | mmu-miR-544    | 20              | mmu-miR-544-3p  |
| MIMAT0003166     | 10              | mmu-miR-546    | 20              | mmu-miR-546     |
| MIMAT0003173     | 10              | mmu-miR-547    | 20              | mmu-miR-547-3p  |
| MIMAT0003890     | 10              | mmu-miR-551b   | 20              | mmu-miR-551b-3p |
| MIMAT0004894     | 10              | mmu-miR-574-3p | 20              | mmu-miR-574-3p  |
| MIMAT0005292     | 10              | mmu-miR-582-3p | 20              | mmu-miR-582-3p  |
| MIMAT0005291     | 10              | mmu-miR-582-5p | 20              | mmu-miR-582-5p  |
| MIMAT0004895     | 10              | mmu-miR-590-5p | 20              | mmu-miR-590-5p  |
| MIMAT0003730     | 10              | mmu-miR-592    | 20              | mmu-miR-592-5p  |
| MIMAT0004942     | 10              | mmu-miR-598    | 20              | mmu-miR-598-3p  |
| MIMAT0003783     | 10              | mmu-miR-615-3p | 20              | mmu-miR-615-3p  |
| MIMAT0004837     | 10              | mmu-miR-615-5p | 20              | mmu-miR-615-5p  |
| MIMAT0003711     | 10              | mmu-miR-652    | 20              | mmu-miR-652-3p  |
| MIMAT0004943     | 10              | mmu-miR-653    | 20              | mmu-miR-653-5p  |

**Supplementary Table S3 (continued)**

| Accession Number | miRBase release | name           | miRBase release | name            |
|------------------|-----------------|----------------|-----------------|-----------------|
| MIMAT0004898     | 10              | mmu-miR-654-3p | 20              | mmu-miR-654-3p  |
| MIMAT0004897     | 10              | mmu-miR-654-5p | 20              | mmu-miR-654-5p  |
| MIMAT0003733     | 10              | mmu-miR-665    | 20              | mmu-miR-665-3p  |
| MIMAT0004823     | 10              | mmu-miR-666-3p | 20              | mmu-miR-666-3p  |
| MIMAT0003737     | 10              | mmu-miR-666-5p | 20              | mmu-miR-666-5p  |
| MIMAT0003734     | 10              | mmu-miR-667    | 20              | mmu-miR-667-3p  |
| MIMAT0003732     | 10              | mmu-miR-668    | 20              | mmu-miR-668-3p  |
| MIMAT0003477     | 10              | mmu-miR-669a   | 20              | mmu-miR-669a-5p |
| MIMAT0003736     | 10              | mmu-miR-670    | 20              | mmu-miR-670-5p  |
| MIMAT0004821     | 10              | mmu-miR-671-3p | 20              | mmu-miR-671-3p  |
| MIMAT0003735     | 10              | mmu-miR-672    | 20              | mmu-miR-672-5p  |
| MIMAT0004824     | 10              | mmu-miR-673-3p | 20              | mmu-miR-673-3p  |
| MIMAT0003739     | 10              | mmu-miR-673-5p | 20              | mmu-miR-673-5p  |
| MIMAT0003740     | 10              | mmu-miR-674    | 20              | mmu-miR-674-5p  |
| MIMAT0003741     | 10              | mmu-miR-674*   | 20              | mmu-miR-674-3p  |
| MIMAT0003726     | 10              | mmu-miR-675-3p | 20              | mmu-miR-675-3p  |
| MIMAT0003725     | 10              | mmu-miR-675-5p | 20              | mmu-miR-675-5p  |
| MIMAT0003782     | 10              | mmu-miR-676    | 20              | mmu-miR-676-3p  |
| MIMAT0003781     | 10              | mmu-miR-676*   | 20              | mmu-miR-676-5p  |
| MIMAT0003451     | 10              | mmu-miR-677    | 20              | mmu-miR-677-5p  |
| MIMAT0003452     | 10              | mmu-miR-678    | 20              | mmu-miR-678     |
| MIMAT0003455     | 10              | mmu-miR-679    | 20              | mmu-miR-679-5p  |
| MIMAT0003457     | 10              | mmu-miR-680    | 20              | mmu-miR-680     |
| MIMAT0003458     | 10              | mmu-miR-681    | 20              | mmu-miR-681     |
| MIMAT0003459     | 10              | mmu-miR-682    | 20              | mmu-miR-682     |
| MIMAT0003461     | 10              | mmu-miR-683    | 20              | mmu-miR-683     |
| MIMAT0003462     | 10              | mmu-miR-684    | 20              | mmu-miR-684     |
| MIMAT0003464     | 10              | mmu-miR-686    | 20              | mmu-miR-686     |
| MIMAT0003466     | 10              | mmu-miR-687    | 20              | mmu-miR-687     |
| MIMAT0003467     | 10              | mmu-miR-688    | 20              | mmu-miR-688     |
| MIMAT0003469     | 10              | mmu-miR-690    | 20              | mmu-miR-690     |
| MIMAT0003470     | 10              | mmu-miR-691    | 20              | mmu-miR-691     |
| MIMAT0003471     | 10              | mmu-miR-692    | 20              | mmu-miR-692     |

**Supplementary Table S3 (continued)**

| Accession Number | miRBase release | name            | miRBase release | name            |
|------------------|-----------------|-----------------|-----------------|-----------------|
| MIMAT0004189     | 10              | mmu-miR-693-3p  | 20              | mmu-miR-693-3p  |
| MIMAT0003472     | 10              | mmu-miR-693-5p  | 20              | mmu-miR-693-5p  |
| MIMAT0003474     | 10              | mmu-miR-694     | 20              | mmu-miR-694     |
| MIMAT0003481     | 10              | mmu-miR-695     | 20              | mmu-miR-695     |
| MIMAT0003483     | 10              | mmu-miR-696     | 20              | mmu-miR-696     |
| MIMAT0003487     | 10              | mmu-miR-697     | 20              | mmu-miR-697     |
| MIMAT0003488     | 10              | mmu-miR-698     | 20              | mmu-miR-698-3p  |
| MIMAT0003490     | 10              | mmu-miR-700     | 20              | mmu-miR-700-3p  |
| MIMAT0003491     | 10              | mmu-miR-701     | 20              | mmu-miR-701-5p  |
| MIMAT0003492     | 10              | mmu-miR-702     | 20              | mmu-miR-702-3p  |
| MIMAT0003494     | 10              | mmu-miR-704     | 20              | mmu-miR-704     |
| MIMAT0003496     | 10              | mmu-miR-706     | 20              | mmu-miR-706     |
| MIMAT0003497     | 10              | mmu-miR-707     | 20              | mmu-miR-707     |
| MIMAT0004828     | 10              | mmu-miR-708     | 20              | mmu-miR-708-5p  |
| MIMAT0003498     | 10              | mmu-miR-708*    | 20              | mmu-miR-708-3p  |
| MIMAT0003499     | 10              | mmu-miR-709     | 20              | mmu-miR-709     |
| MIMAT0003500     | 10              | mmu-miR-710     | 20              | mmu-miR-710     |
| MIMAT0003501     | 10              | mmu-miR-711     | 20              | mmu-miR-711     |
| MIMAT0003743     | 10              | mmu-miR-712*    | 20              | mmu-miR-712-3p  |
| MIMAT0003504     | 10              | mmu-miR-713     | 20              | mmu-miR-713     |
| MIMAT0003510     | 10              | mmu-miR-717     | 20              | mmu-miR-717     |
| MIMAT0003514     | 10              | mmu-miR-718     | 20              | mmu-miR-718     |
| MIMAT0003465     | 10              | mmu-miR-719     | 20              | mmu-miR-719     |
| MIMAT0003515     | 10              | mmu-miR-721     | 20              | mmu-miR-721     |
| MIMAT0004236     | 10              | mmu-miR-741     | 20              | mmu-miR-741-3p  |
| MIMAT0004237     | 10              | mmu-miR-742     | 20              | mmu-miR-742-3p  |
| MIMAT0004838     | 10              | mmu-miR-742*    | 20              | mmu-miR-742-5p  |
| MIMAT0004238     | 10              | mmu-miR-743a    | 20              | mmu-miR-743a-3p |
| MIMAT0004840     | 10              | mmu-miR-743b-3p | 20              | mmu-miR-743b-3p |
| MIMAT0004839     | 10              | mmu-miR-743b-5p | 20              | mmu-miR-743b-5p |
| MIMAT0004187     | 10              | mmu-miR-744     | 20              | mmu-miR-744-5p  |
| MIMAT0004820     | 10              | mmu-miR-744*    | 20              | mmu-miR-744-3p  |
| MIMAT0003889     | 10              | mmu-miR-758     | 20              | mmu-miR-758-3p  |

**Supplementary Table S3 (continued)**

| Accession Number | miRBase release | name            | miRBase release | name            |
|------------------|-----------------|-----------------|-----------------|-----------------|
| MIMAT0003897     | 10              | mmu-miR-759     | 20              | mmu-miR-759     |
| MIMAT0003898     | 10              | mmu-miR-760     | 20              | mmu-miR-760-3p  |
| MIMAT0003893     | 10              | mmu-miR-761     | 20              | mmu-miR-761     |
| MIMAT0003892     | 10              | mmu-miR-762     | 20              | mmu-miR-762     |
| MIMAT0003896     | 10              | mmu-miR-763     | 20              | mmu-miR-763     |
| MIMAT0003895     | 10              | mmu-miR-764-3p  | 20              | mmu-miR-764-3p  |
| MIMAT0003894     | 10              | mmu-miR-764-5p  | 20              | mmu-miR-764-5p  |
| MIMAT0003891     | 10              | mmu-miR-770-3p  | 20              | mmu-miR-770-3p  |
| MIMAT0004822     | 10              | mmu-miR-770-5p  | 20              | mmu-miR-770-5p  |
| MIMAT0004670     | 10              | mmu-miR-7a*     | 20              | mmu-miR-7a-1-3p |
| MIMAT0000678     | 10              | mmu-miR-7b      | 20              | mmu-miR-7b-5p   |
| MIMAT0004188     | 10              | mmu-miR-802     | 20              | mmu-miR-802-5p  |
| MIMAT0004210     | 10              | mmu-miR-804     | 20              | mmu-miR-804     |
| MIMAT0004841     | 10              | mmu-miR-871     | 20              | mmu-miR-871-5p  |
| MIMAT0004934     | 10              | mmu-miR-872     | 20              | mmu-miR-872-5p  |
| MIMAT0004935     | 10              | mmu-miR-872*    | 20              | mmu-miR-872-3p  |
| MIMAT0004936     | 10              | mmu-miR-873     | 20              | mmu-miR-873a-5p |
| MIMAT0004853     | 10              | mmu-miR-874     | 20              | mmu-miR-874-3p  |
| MIMAT0004938     | 10              | mmu-miR-875-3p  | 20              | mmu-miR-875-3p  |
| MIMAT0004937     | 10              | mmu-miR-875-5p  | 20              | mmu-miR-875-5p  |
| MIMAT0004855     | 10              | mmu-miR-876-3p  | 20              | mmu-miR-876-3p  |
| MIMAT0004854     | 10              | mmu-miR-876-5p  | 20              | mmu-miR-876-5p  |
| MIMAT0004862     | 10              | mmu-miR-877*    | 20              | mmu-miR-877-3p  |
| MIMAT0004933     | 10              | mmu-miR-878-3p  | 20              | mmu-miR-878-3p  |
| MIMAT0004932     | 10              | mmu-miR-878-5p  | 20              | mmu-miR-878-5p  |
| MIMAT0004842     | 10              | mmu-miR-879     | 20              | mmu-miR-879-5p  |
| MIMAT0004843     | 10              | mmu-miR-879*    | 20              | mmu-miR-879-3p  |
| MIMAT0004846     | 10              | mmu-miR-881     | 20              | mmu-miR-881-3p  |
| MIMAT0004845     | 10              | mmu-miR-881*    | 20              | mmu-miR-881-5p  |
| MIMAT0004847     | 10              | mmu-miR-882     | 20              | mmu-miR-882     |
| MIMAT0004849     | 10              | mmu-miR-883a-3p | 20              | mmu-miR-883a-3p |
| MIMAT0004848     | 10              | mmu-miR-883a-5p | 20              | mmu-miR-883a-5p |
| MIMAT0004851     | 10              | mmu-miR-883b-3p | 20              | mmu-miR-883b-3p |

**Supplementary Table S3 (continued)**

| <u>Accession Number</u> | <u>miRBase release</u> | <u>name</u>  | <u>miRBase release</u> | <u>name</u>      |
|-------------------------|------------------------|--------------|------------------------|------------------|
| MIMAT0000142            | 10                     | mmu-miR-9    | 20                     | mmu-miR-9-5p     |
| MIMAT0000143            | 10                     | mmu-miR-9*   | 20                     | mmu-miR-9-3p     |
| MIMAT0000539            | 10                     | mmu-miR-92a  | 20                     | mmu-miR-92a-3p   |
| MIMAT0004635            | 10                     | mmu-miR-92a* | 20                     | mmu-miR-92a-2-5p |
| MIMAT0000540            | 10                     | mmu-miR-93   | 20                     | mmu-miR-93-5p    |
| MIMAT0004636            | 10                     | mmu-miR-93*  | 20                     | mmu-miR-93-3p    |
| MIMAT0000541            | 10                     | mmu-miR-96   | 20                     | mmu-miR-96-5p    |
| MIMAT0000545            | 10                     | mmu-miR-98   | 20                     | mmu-miR-98-5p    |
| MIMAT0000131            | 10                     | mmu-miR-99a  | 20                     | mmu-miR-99a-5p   |
| MIMAT0000132            | 10                     | mmu-miR-99b  | 20                     | mmu-miR-99b-5p   |
| MIMAT0004525            | 10                     | mmu-miR-99b* | 20                     | mmu-miR-99b-3p   |



**Supplementary Table S4: Cross-species annotation of miRNAs in Homo sapiens and Mus musculus for miRBase release v20**

| Homo sapiens     |                 | Mus musculus     |                 |                       |
|------------------|-----------------|------------------|-----------------|-----------------------|
| Accession Number | miRNA Name      | Accession Number | miRNA Name      | Assay Name            |
| MIMAT0000062     | hsa-let-7a-5p   | MIMAT0000521     | mmu-let-7a-5p   | mmu-let-7a            |
| MIMAT0000063     | hsa-let-7b-5p   | MIMAT0000522     | mmu-let-7b-5p   | mmu-let-7b            |
| MIMAT0000064     | hsa-let-7c-5p   | MIMAT0000523     | mmu-let-7c-5p   | mmu-let-7c            |
| MIMAT0000065     | hsa-let-7d-5p   | MIMAT0000383     | mmu-let-7d-5p   | mmu-let-7d            |
| MIMAT0000067     | hsa-let-7f-5p   | MIMAT0000525     | mmu-let-7f-5p   | mmu-let-7f            |
| MIMAT0000414     | hsa-let-7g-5p   | MIMAT0000121     | mmu-let-7g-5p   | mmu-let-7g            |
| MIMAT0000415     | hsa-let-7i-5p   | MIMAT0000122     | mmu-let-7i-5p   | mmu-let-7i            |
| MIMAT0000086     | hsa-miR-29a-3p  | MIMAT0000535     | mmu-miR-29a-3p  | mmu-miR-29a           |
| MIMAT0000100     | hsa-miR-29b-3p  | MIMAT0000127     | mmu-miR-29b-3p  | mmu-miR-29b           |
| MIMAT0000681     | hsa-miR-29c-3p  | MIMAT0000536     | mmu-miR-29c-3p  | mmu-miR-29c           |
| MIMAT0000255     | hsa-miR-34a-5p  | MIMAT0000542     | mmu-miR-34a-5p  | mmu-miR-34a           |
| MIMAT0000096     | hsa-miR-98-5p   | MIMAT0000545     | mmu-miR-98-5p   | mmu-miR-98            |
| MIMAT0000073     | hsa-miR-19a-3p  | MIMAT0000651     | mmu-miR-19a-3p  | mmu-miR-19a           |
| MIMAT0000074     | hsa-miR-19b-3p  | MIMAT0000513     | mmu-miR-19b-3p  | mmu-miR-19b           |
| MIMAT0000686     | hsa-miR-34c-5p  | MIMAT0000381     | mmu-miR-34c-5p  | mmu-miR-34c           |
| MIMAT0001541     | hsa-miR-449a    | MIMAT0001542     | mmu-miR-449a-5p | mmu-miR-449a          |
| MIMAT0002816     | hsa-miR-494-3p  | MIMAT0003182     | mmu-miR-494-3p  | mmu-miR-494 (TM 2365) |
| MIMAT0000066     | hsa-let-7e-5p   | MIMAT0000524     | mmu-let-7e-5p   | mmu-let-7e            |
| MIMAT0000416     | hsa-miR-1       | MIMAT0000123     | mmu-miR-1a-3p   | mmu-miR-1             |
| MIMAT0000098     | hsa-miR-100-5p  | MIMAT0000655     | mmu-miR-100-5p  | mmu-miR-100           |
| MIMAT0000099     | hsa-miR-101-3p  | MIMAT0000133     | mmu-miR-101a-3p | mmu-miR-101a          |
| MIMAT0000101     | hsa-miR-103a-3p | MIMAT0000546     | mmu-miR-103-3p  | mmu-miR-103           |
| MIMAT0000680     | hsa-miR-106b-5p | MIMAT0000386     | mmu-miR-106b-5p | mmu-miR-106b          |
| MIMAT0000104     | hsa-miR-107     | MIMAT0000647     | mmu-miR-107-3p  | mmu-miR-107           |
| MIMAT0000253     | hsa-miR-10a-5p  | MIMAT0000648     | mmu-miR-10a-5p  | mmu-miR-10a           |
| MIMAT0000254     | hsa-miR-10b-5p  | MIMAT0000208     | mmu-miR-10b-5p  | mmu-miR-10b (TM 2218) |
| MIMAT0000422     | hsa-miR-124-3p  | MIMAT0000134     | mmu-miR-124-3p  | mmu-miR-124           |
| MIMAT0000443     | hsa-miR-125a-5p | MIMAT0000135     | mmu-miR-125a-5p | mmu-miR-125a-5p       |
| MIMAT0000423     | hsa-miR-125b-5p | MIMAT0000136     | mmu-miR-125b-5p | mmu-miR-125b-5p       |
| MIMAT0000445     | hsa-miR-126-3p  | MIMAT0000138     | mmu-miR-126a-3p | mmu-miR-126-3p        |

**Supplementary Table S4 (continued)**

| Accession Number | miRNA Name      | Accession Number | miRNA Name      | Assay Name       |
|------------------|-----------------|------------------|-----------------|------------------|
| MIMAT0000444     | hsa-miR-126-5p  | MIMAT0000137     | mmu-miR-126a-5p | mmu-miR-126-5p   |
| MIMAT0000446     | hsa-miR-127-3p  | MIMAT0000139     | mmu-miR-127-3p  | mmu-miR-127      |
| MIMAT0000424     | hsa-miR-128-3p  | MIMAT0000140     | mmu-miR-128-3p  | mmu-miR-128a     |
| MIMAT0000242     | hsa-miR-129-5p  | MIMAT0000209     | mmu-miR-129-5p  | mmu-miR-129-5p   |
| MIMAT0000425     | hsa-miR-130a-3p | MIMAT0000141     | mmu-miR-130a-3p | mmu-miR-130a     |
| MIMAT0000691     | hsa-miR-130b-3p | MIMAT0000387     | mmu-miR-130b-3p | mmu-miR-130b     |
| MIMAT0000426     | hsa-miR-132-3p  | MIMAT0000144     | mmu-miR-132-3p  | mmu-miR-132      |
| MIMAT0000427     | hsa-miR-133a-3p | MIMAT0000145     | mmu-miR-133a-3p | mmu-miR-133a     |
| MIMAT0000770     | hsa-miR-133b    | MIMAT0000769     | mmu-miR-133b-3p | mmu-miR-133b     |
| MIMAT0000447     | hsa-miR-134-5p  | MIMAT0000146     | mmu-miR-134-5p  | mmu-miR-134      |
| MIMAT0000428     | hsa-miR-135a-5p | MIMAT0000147     | mmu-miR-135a-5p | mmu-miR-135a     |
| MIMAT0000758     | hsa-miR-135b-5p | MIMAT0000612     | mmu-miR-135b-5p | mmu-miR-135b     |
| MIMAT0000429     | hsa-miR-137     | MIMAT0000149     | mmu-miR-137-3p  | mmu-miR-137      |
| MIMAT0000430     | hsa-miR-138-5p  | MIMAT0000150     | mmu-miR-138-5p  | mmu-miR-138      |
| MIMAT0000431     | hsa-miR-140-5p  | MIMAT0000151     | mmu-miR-140-5p  | mmu-miR-140      |
| MIMAT0000432     | hsa-miR-141-3p  | MIMAT0000153     | mmu-miR-141-3p  | mmu-miR-141      |
| MIMAT0000434     | hsa-miR-142-3p  | MIMAT0000155     | mmu-miR-142-3p  | mmu-miR-142-3p   |
| MIMAT0000433     | hsa-miR-142-5p  | MIMAT0000154     | mmu-miR-142-5p  | mmu-miR-142-5p   |
| MIMAT0000435     | hsa-miR-143-3p  | MIMAT0000247     | mmu-miR-143-3p  | mmu-miR-143      |
| MIMAT0000437     | hsa-miR-145-5p  | MIMAT0000157     | mmu-miR-145a-5p | mmu-miR-145      |
| MIMAT0000449     | hsa-miR-146a-5p | MIMAT0000158     | mmu-miR-146a-5p | mmu-miR-146a     |
| MIMAT0002809     | hsa-miR-146b-5p | MIMAT0003475     | mmu-miR-146b-5p | mmu-miR-146b     |
| MIMAT0000243     | hsa-miR-148a-3p | MIMAT0000516     | mmu-miR-148a-3p | mmu-miR-148a     |
| MIMAT0000759     | hsa-miR-148b-3p | MIMAT0000580     | mmu-miR-148b-3p | mmu-miR-148b     |
| MIMAT0000450     | hsa-miR-149-5p  | MIMAT0000159     | mmu-miR-149-5p  | hsa-miR-149      |
| MIMAT0000451     | hsa-miR-150-5p  | MIMAT0000160     | mmu-miR-150-5p  | mmu-miR-150      |
| MIMAT0000438     | hsa-miR-152-3p  | MIMAT0000162     | mmu-miR-152-3p  | mmu-miR-152      |
| MIMAT0000439     | hsa-miR-153-3p  | MIMAT0000163     | mmu-miR-153-3p  | mmu-miR-153      |
| MIMAT0000453     | hsa-miR-154-3p  | MIMAT0004537     | mmu-miR-154-3p  | hsa-miR-154_star |
| MIMAT0000452     | hsa-miR-154-5p  | MIMAT0000164     | mmu-miR-154-5p  | mmu-miR-154      |
| MIMAT0000068     | hsa-miR-15a-5p  | MIMAT0000526     | mmu-miR-15a-5p  | mmu-miR-15a      |

**Supplementary Table S4 (continued)**

| Accession Number | miRNA Name      | Accession Number | miRNA Name        | Assay Name        |
|------------------|-----------------|------------------|-------------------|-------------------|
| MIMAT0000417     | hsa-miR-15b-5p  | MIMAT0000124     | mmu-miR-15b-5p    | mmu-miR-15b       |
| MIMAT0000069     | hsa-miR-16-5p   | MIMAT0000527     | mmu-miR-16-5p     | mmu-miR-16        |
| MIMAT0000070     | hsa-miR-17-5p   | MIMAT0000649     | mmu-miR-17-5p     | mmu-miR-17        |
| MIMAT0000270     | hsa-miR-181a-3p | MIMAT0000660     | mmu-miR-181a-1-3p | hsa-miR-213       |
| MIMAT0000256     | hsa-miR-181a-5p | MIMAT0000210     | mmu-miR-181a-5p   | mmu-miR-181a      |
| MIMAT0000258     | hsa-miR-181c-5p | MIMAT0000674     | mmu-miR-181c-5p   | mmu-miR-181c      |
| MIMAT0000261     | hsa-miR-183-5p  | MIMAT0000212     | mmu-miR-183-5p    | mmu-miR-183       |
| MIMAT0000454     | hsa-miR-184     | MIMAT0000213     | mmu-miR-184-3p    | mmu-miR-184       |
| MIMAT0000455     | hsa-miR-185-5p  | MIMAT0000214     | mmu-miR-185-5p    | mmu-miR-185       |
| MIMAT0000456     | hsa-miR-186-5p  | MIMAT0000215     | mmu-miR-186-5p    | mmu-miR-186       |
| MIMAT0000262     | hsa-miR-187-3p  | MIMAT0000216     | mmu-miR-187-3p    | mmu-miR-187       |
| MIMAT0000457     | hsa-miR-188-5p  | MIMAT0000217     | mmu-miR-188-5p    | mmu-miR-188-5p    |
| MIMAT0000072     | hsa-miR-18a-5p  | MIMAT0000528     | mmu-miR-18a-5p    | mmu-miR-18a       |
| MIMAT0000458     | hsa-miR-190a-5p | MIMAT0000220     | mmu-miR-190a-5p   | mmu-miR-190       |
| MIMAT0000440     | hsa-miR-191-5p  | MIMAT0000221     | mmu-miR-191-5p    | mmu-miR-191       |
| MIMAT0000222     | hsa-miR-192-5p  | MIMAT0000517     | mmu-miR-192-5p    | mmu-miR-192       |
| MIMAT0000459     | hsa-miR-193a-3p | MIMAT0000223     | mmu-miR-193a-3p   | mmu-miR-193       |
| MIMAT0000460     | hsa-miR-194-5p  | MIMAT0000224     | mmu-miR-194-5p    | mmu-miR-194       |
| MIMAT0000461     | hsa-miR-195-5p  | MIMAT0000225     | mmu-miR-195a-5p   | mmu-miR-195       |
| MIMAT0001080     | hsa-miR-196b-5p | MIMAT0001081     | mmu-miR-196b-5p   | mmu-miR-196b      |
| MIMAT0000227     | hsa-miR-197-3p  | removed          | NA                | mmu-miR-197       |
| MIMAT0000232     | hsa-miR-199a-3p | MIMAT0004667     | mmu-miR-199b-3p   | mmu-miR-199a-3p   |
| MIMAT0000231     | hsa-miR-199a-5p | MIMAT0000229     | mmu-miR-199a-5p   | mmu-miR-199a-5p   |
| MIMAT0000682     | hsa-miR-200a-3p | MIMAT0000519     | mmu-miR-200a-3p   | mmu-miR-200a      |
| MIMAT0001620     | hsa-miR-200a-5p | MIMAT0004619     | mmu-miR-200a-5p   | hsa-miR-200a_star |
| MIMAT0000318     | hsa-miR-200b-3p | MIMAT0000233     | mmu-miR-200b-3p   | mmu-miR-200b      |
| MIMAT0000617     | hsa-miR-200c-3p | MIMAT0000657     | mmu-miR-200c-3p   | mmu-miR-200c      |
| MIMAT0000264     | hsa-miR-203a    | MIMAT0000236     | mmu-miR-203-3p    | mmu-miR-203       |
| MIMAT0000265     | hsa-miR-204-5p  | MIMAT0000237     | mmu-miR-204-5p    | mmu-miR-204       |
| MIMAT0000266     | hsa-miR-205-5p  | MIMAT0000238     | mmu-miR-205-5p    | mmu-miR-205       |
| MIMAT0000462     | hsa-miR-206     | MIMAT0000239     | mmu-miR-206-3p    | hsa-miR-206       |

**Supplementary Table S4 (continued)**

| Accession Number | miRNA Name      | Accession Number | miRNA Name      | Assay Name     |
|------------------|-----------------|------------------|-----------------|----------------|
| MIMAT0000241     | hsa-miR-208a-3p | MIMAT0000520     | mmu-miR-208a-3p | mmu-miR-208    |
| MIMAT0000075     | hsa-miR-20a-5p  | MIMAT0000529     | mmu-miR-20a-5p  | mmu-miR-20a    |
| MIMAT0001413     | hsa-miR-20b-5p  | MIMAT0003187     | mmu-miR-20b-5p  | mmu-miR-20b    |
| MIMAT0000076     | hsa-miR-21-5p   | MIMAT0000530     | mmu-miR-21a-5p  | mmu-miR-21     |
| MIMAT0000267     | hsa-miR-210-3p  | MIMAT0000658     | mmu-miR-210-3p  | mmu-miR-210    |
| MIMAT0000271     | hsa-miR-214-3p  | MIMAT0000661     | mmu-miR-214-3p  | mmu-miR-214    |
| MIMAT0000273     | hsa-miR-216a-5p | MIMAT0000662     | mmu-miR-216a-5p | mmu-miR-216a   |
| MIMAT0000275     | hsa-miR-218-5p  | MIMAT0000663     | mmu-miR-218-5p  | mmu-miR-218    |
| MIMAT0000276     | hsa-miR-219a-5p | MIMAT0000664     | mmu-miR-219a-5p | mmu-miR-219    |
| MIMAT0000077     | hsa-miR-22-3p   | MIMAT0000531     | mmu-miR-22-3p   | hsa-miR-22     |
| MIMAT0000278     | hsa-miR-221-3p  | MIMAT0000669     | mmu-miR-221-3p  | mmu-miR-221    |
| MIMAT0000279     | hsa-miR-222-3p  | MIMAT0000670     | mmu-miR-222-3p  | mmu-miR-222    |
| MIMAT0000280     | hsa-miR-223-3p  | MIMAT0000665     | mmu-miR-223-3p  | mmu-miR-223    |
| MIMAT0000078     | hsa-miR-23a-3p  | MIMAT0000532     | mmu-miR-23a-3p  | mmu-miR-23a    |
| MIMAT0000418     | hsa-miR-23b-3p  | MIMAT0000125     | mmu-miR-23b-3p  | mmu-miR-23b    |
| MIMAT0000080     | hsa-miR-24-3p   | MIMAT0000219     | mmu-miR-24-3p   | mmu-miR-24     |
| MIMAT0000081     | hsa-miR-25-3p   | MIMAT0000652     | mmu-miR-25-3p   | mmu-miR-25     |
| MIMAT0000082     | hsa-miR-26a-5p  | MIMAT0000533     | mmu-miR-26a-5p  | mmu-miR-26a    |
| MIMAT0000083     | hsa-miR-26b-5p  | MIMAT0000534     | mmu-miR-26b-5p  | mmu-miR-26b    |
| MIMAT0000084     | hsa-miR-27a-3p  | MIMAT0000537     | mmu-miR-27a-3p  | mmu-miR-27a    |
| MIMAT0000419     | hsa-miR-27b-3p  | MIMAT0000126     | mmu-miR-27b-3p  | mmu-miR-27b    |
| MIMAT0000085     | hsa-miR-28-5p   | MIMAT0000653     | mmu-miR-28a-5p  | mmu-miR-28     |
| MIMAT0000690     | hsa-miR-296-5p  | MIMAT0000374     | mmu-miR-296-5p  | mmu-miR-296-5p |
| MIMAT0002890     | hsa-miR-299-5p  | MIMAT0000377     | mmu-miR-299a-5p | hsa-miR-299-5p |
| MIMAT0000688     | hsa-miR-301a-3p | MIMAT0000379     | mmu-miR-301a-3p | mmu-miR-301a   |
| MIMAT0000684     | hsa-miR-302a-3p | MIMAT0000380     | mmu-miR-302a-3p | mmu-miR-302a   |
| MIMAT0000715     | hsa-miR-302b-3p | MIMAT0003374     | mmu-miR-302b-3p | mmu-miR-302b   |
| MIMAT0000718     | hsa-miR-302d-3p | MIMAT0003377     | mmu-miR-302d-3p | mmu-miR-302d   |
| MIMAT0000088     | hsa-miR-30a-3p  | MIMAT0000129     | mmu-miR-30a-3p  | hsa-miR-30a-3p |
| MIMAT0000087     | hsa-miR-30a-5p  | MIMAT0000128     | mmu-miR-30a-5p  | mmu-miR-30a    |
| MIMAT0000420     | hsa-miR-30b-5p  | MIMAT0000130     | mmu-miR-30b-5p  | mmu-miR-30b    |

**Supplementary Table S4 (continued)**

| Accession Number | miRNA Name      | Accession Number | miRNA Name      | Assay Name            |
|------------------|-----------------|------------------|-----------------|-----------------------|
| MIMAT0000244     | hsa-miR-30c-5p  | MIMAT0000514     | mmu-miR-30c-5p  | mmu-miR-30c           |
| MIMAT0000245     | hsa-miR-30d-5p  | MIMAT0000515     | mmu-miR-30d-5p  | mmu-miR-30d           |
| MIMAT0000693     | hsa-miR-30e-3p  | MIMAT0000249     | mmu-miR-30e-3p  | hsa-miR-30e-3p        |
| MIMAT0000692     | hsa-miR-30e-5p  | MIMAT0000248     | mmu-miR-30e-5p  | mmu-miR-30e           |
| MIMAT0000090     | hsa-miR-32-5p   | MIMAT0000654     | mmu-miR-32-5p   | mmu-miR-32            |
| MIMAT0000510     | hsa-miR-320a    | MIMAT0000666     | mmu-miR-320-3p  | mmu-miR-320           |
| MIMAT0000755     | hsa-miR-323a-3p | MIMAT0000551     | mmu-miR-323-3p  | mmu-miR-323-3p        |
| MIMAT0000761     | hsa-miR-324-5p  | MIMAT0000555     | mmu-miR-324-5p  | mmu-miR-324-5p        |
| MIMAT0000752     | hsa-miR-328-3p  | MIMAT0000565     | mmu-miR-328-3p  | mmu-miR-328           |
| MIMAT0000760     | hsa-miR-331-3p  | MIMAT0000571     | mmu-miR-331-3p  | mmu-miR-331-3p        |
| MIMAT0000765     | hsa-miR-335-5p  | MIMAT0000766     | mmu-miR-335-5p  | mmu-miR-335-5p        |
| MIMAT0000763     | hsa-miR-338-3p  | MIMAT0000582     | mmu-miR-338-3p  | mmu-miR-338-3p        |
| MIMAT0000764     | hsa-miR-339-5p  | MIMAT0000584     | mmu-miR-339-5p  | mmu-miR-339-5p        |
| MIMAT0000750     | hsa-miR-340-3p  | MIMAT0000586     | mmu-miR-340-3p  | mmu-miR-340-3p        |
| MIMAT0000753     | hsa-miR-342-3p  | MIMAT0000590     | mmu-miR-342-3p  | mmu-miR-342-3p        |
| MIMAT0000703     | hsa-miR-361-5p  | MIMAT0000704     | mmu-miR-361-5p  | mmu-miR-361           |
| MIMAT0000707     | hsa-miR-363-3p  | MIMAT0000708     | mmu-miR-363-3p  | mmu-miR-363           |
| MIMAT0000710     | hsa-miR-365a-3p | MIMAT0000711     | mmu-miR-365-3p  | mmu-miR-365           |
| MIMAT0000719     | hsa-miR-367-3p  | MIMAT0003181     | mmu-miR-367-3p  | mmu-miR-367           |
| MIMAT0000721     | hsa-miR-369-3p  | MIMAT0003186     | mmu-miR-369-3p  | mmu-miR-369-3p        |
| MIMAT0001621     | hsa-miR-369-5p  | MIMAT0003185     | mmu-miR-369-5p  | mmu-miR-369-5p        |
| MIMAT0000722     | hsa-miR-370-3p  | MIMAT0001095     | mmu-miR-370-3p  | mmu-miR-370 (TM 2275) |
| MIMAT0000728     | hsa-miR-375     | MIMAT0000739     | mmu-miR-375-3p  | mmu-miR-375           |
| MIMAT0000730     | hsa-miR-377-3p  | MIMAT0000741     | mmu-miR-377-3p  | mmu-miR-377           |
| MIMAT0000731     | hsa-miR-378a-5p | MIMAT0000742     | mmu-miR-378a-5p | hsa-miR-378           |
| MIMAT0000733     | hsa-miR-379-5p  | MIMAT0000743     | mmu-miR-379-5p  | mmu-miR-379           |
| MIMAT0000736     | hsa-miR-381-3p  | MIMAT0000746     | mmu-miR-381-3p  | mmu-miR-381           |
| MIMAT0000737     | hsa-miR-382-5p  | MIMAT0000747     | mmu-miR-382-5p  | mmu-miR-382           |
| MIMAT0001639     | hsa-miR-409-3p  | MIMAT0001090     | mmu-miR-409-3p  | mmu-miR-409-3p        |
| MIMAT0001638     | hsa-miR-409-5p  | MIMAT0004746     | mmu-miR-409-5p  | mmu-miR-409-5p        |
| MIMAT0002171     | hsa-miR-410-3p  | MIMAT0001091     | mmu-miR-410-3p  | mmu-miR-410           |

**Supplementary Table S4 (continued)**

| Accession Number | miRNA Name      | Accession Number | miRNA Name      | Assay Name             |
|------------------|-----------------|------------------|-----------------|------------------------|
| MIMAT0003329     | hsa-miR-411-5p  | MIMAT0004747     | mmu-miR-411-5p  | mmu-miR-411            |
| MIMAT0003393     | hsa-miR-425-5p  | MIMAT0004750     | mmu-miR-425-5p  | mmu-miR-425            |
| MIMAT0001625     | hsa-miR-431-5p  | MIMAT0001418     | mmu-miR-431-5p  | mmu-miR-431            |
| MIMAT0001627     | hsa-miR-433-3p  | MIMAT0001420     | mmu-miR-433-3p  | mmu-miR-433            |
| MIMAT0001532     | hsa-miR-448     | MIMAT0001533     | mmu-miR-448-3p  | mmu-miR-448            |
| MIMAT0001545     | hsa-miR-450a-5p | MIMAT0001546     | mmu-miR-450a-5p | mmu-miR-450a-5p        |
| MIMAT0001631     | hsa-miR-451a    | MIMAT0001632     | mmu-miR-451a    | mmu-miR-451            |
| MIMAT0003150     | hsa-miR-455-5p  | MIMAT0003485     | mmu-miR-455-5p  | hsa-miR-455            |
| MIMAT0002174     | hsa-miR-484     | MIMAT0003127     | mmu-miR-484     | mmu-miR-484            |
| MIMAT0002175     | hsa-miR-485-5p  | MIMAT0003128     | mmu-miR-485-5p  | hsa-miR-485-5p         |
| MIMAT0002177     | hsa-miR-486-5p  | MIMAT0014943     | mmu-miR-3107-5p | mmu-miR-486            |
| MIMAT0003180     | hsa-miR-487b-3p | MIMAT0003184     | mmu-miR-487b-3p | mmu-miR-487b (TM 1285) |
| MIMAT0002806     | hsa-miR-490-3p  | MIMAT0003780     | mmu-miR-490-3p  | mmu-miR-490            |
| MIMAT0002807     | hsa-miR-491-5p  | MIMAT0003486     | mmu-miR-491-5p  | mmu-miR-491            |
| MIMAT0002817     | hsa-miR-495-3p  | MIMAT0003456     | mmu-miR-495-3p  | mmu-miR-495            |
| MIMAT0002818     | hsa-miR-496     | MIMAT0003738     | mmu-miR-496a-3p | mmu-miR-496            |
| MIMAT0002870     | hsa-miR-499a-5p | MIMAT0003482     | mmu-miR-499-5p  | mmu-miR-499            |
| MIMAT0002875     | hsa-miR-504-5p  | MIMAT0004889     | mmu-miR-504-5p  | mmu-miR-504            |
| MIMAT0002888     | hsa-miR-532-5p  | MIMAT0002889     | mmu-miR-532-5p  | mmu-miR-532-5p         |
| MIMAT0003163     | hsa-miR-539-5p  | MIMAT0003169     | mmu-miR-539-5p  | mmu-miR-539            |
| MIMAT0003389     | hsa-miR-542-3p  | MIMAT0003172     | mmu-miR-542-3p  | mmu-miR-542-3p         |
| MIMAT0003233     | hsa-miR-551b-3p | MIMAT0003890     | mmu-miR-551b-3p | mmu-miR-551b           |
| MIMAT0003239     | hsa-miR-574-3p  | MIMAT0004894     | mmu-miR-574-3p  | mmu-miR-574-3p         |
| MIMAT0003258     | hsa-miR-590-5p  | MIMAT0004895     | mmu-miR-590-5p  | mmu-miR-590-5p         |
| MIMAT0003283     | hsa-miR-615-3p  | MIMAT0003783     | mmu-miR-615-3p  | mmu-miR-615-3p         |
| MIMAT0003322     | hsa-miR-652-3p  | MIMAT0003711     | mmu-miR-652-3p  | mmu-miR-652            |
| MIMAT0000252     | hsa-miR-7-5p    | MIMAT0000677     | mmu-miR-7a-5p   | mmu-miR-7a             |
| MIMAT0000442     | hsa-miR-9-3p    | MIMAT0000143     | mmu-miR-9-3p    | hsa-miR-9_star         |
| MIMAT0000441     | hsa-miR-9-5p    | MIMAT0000142     | mmu-miR-9-5p    | mmu-miR-9              |
| MIMAT0000093     | hsa-miR-93-5p   | MIMAT0000540     | mmu-miR-93-5p   | mmu-miR-93             |
| MIMAT0000095     | hsa-miR-96-5p   | MIMAT0000541     | mmu-miR-96-5p   | mmu-miR-96             |

**Supplementary Table S4 (continued)**

| Accession Number | miRNA Name     | Accession Number | miRNA Name     | Assay Name  |
|------------------|----------------|------------------|----------------|-------------|
| MIMAT0000097     | hsa-miR-99a-5p | MIMAT0000131     | mmu-miR-99a-5p | mmu-miR-99a |
| MIMAT0000689     | hsa-miR-99b-5p | MIMAT0000132     | mmu-miR-99b-5p | mmu-miR-99b |

**Supplementary Table S5: Annotation update of mature miRNA from MirTarget2**

| name (query)   | miRBase release (update) | accession number (update) | name (update)   | sequence (update)         |
|----------------|--------------------------|---------------------------|-----------------|---------------------------|
| hsa-miR-106a   | 20                       | MIMAT0000103              | hsa-miR-106a-5p | AAAAGUGCUUACAGUGCAGGUAG   |
| hsa-miR-106b   | 20                       | MIMAT0000680              | hsa-miR-106b-5p | UAAAGUGCUGACAGUGCAGAU     |
| hsa-miR-101    | 20                       | MIMAT0000099              | hsa-miR-101-3p  | UACAGUACUGUGAUAAACUGAA    |
| hsa-miR-1252   | 20                       | MIMAT0005944              | hsa-miR-1252-5p | AGAAGGAAAUUGAAUUCAUUUA    |
| hsa-miR-1323   | 20                       | MIMAT0005795              | hsa-miR-1323    | UCAAACUGAGGGGCAUUUUCU     |
| hsa-miR-142-5p | 20                       | MIMAT0000433              | hsa-miR-142-5p  | CAUAAAGUAGAAAGCACUACU     |
| hsa-miR-17     | 20                       | MIMAT0000070              | hsa-miR-17-5p   | CAAAGUGCUCUACAGUGCAGGUAG- |
| hsa-miR-1915   | 20                       | MIMAT0007892              | hsa-miR-1915-3p | CCCCAGGGCGACGCGGCGGG      |
| hsa-miR-19a    | 20                       | MIMAT0000073              | hsa-miR-19a-3p  | UGUGCAAUCUAUGCAAACUGA     |
| hsa-miR-19b    | 20                       | MIMAT0000074              | hsa-miR-19b-3p  | UGUGCAAUCCAUGCAAACUGA     |
| hsa-miR-202    | 20                       | MIMAT0002811              | hsa-miR-202-3p  | AGAGGUUAUAGGGCAUGGGAA     |
| hsa-miR-20a    | 20                       | MIMAT0000075              | hsa-miR-20a-5p  | UAAAGUGCUCUUAUAGUGCAGGUAG |
| hsa-miR-20b    | 20                       | MIMAT0001413              | hsa-miR-20b-5p  | CAAAGUGCUCUUAUAGUGCAGGUAG |
| hsa-miR-29a    | 20                       | MIMAT0000086              | hsa-miR-29a-3p  | UAGCACCAUCUGAAAUCGGUUA    |
| hsa-miR-29b    | 20                       | MIMAT0000100              | hsa-miR-29b-3p  | UAGCACCAUUUGAAAUCAGUGUU   |
| hsa-miR-29c    | 20                       | MIMAT0000681              | hsa-miR-29c-3p  | UAGCACCAUUUGAAAUCGGUUA    |
| hsa-miR-302a   | 20                       | MIMAT0000684              | hsa-miR-302a-3p | UAAGUGCUCUCCAUGUUUUGGUGA  |
| hsa-miR-302b   | 20                       | MIMAT0000715              | hsa-miR-302b-3p | UAAGUGCUCUCCAUGUUUUAGUAG  |
| hsa-miR-302c   | 20                       | MIMAT0000717              | hsa-miR-302c-3p | UAAGUGCUCUCCAUGUUUCAGUGG  |
| hsa-miR-302d   | 20                       | MIMAT0000718              | hsa-miR-302d-3p | UAAGUGCUCUCCAUGUUUGAGUGU  |
| hsa-miR-302e   | 20                       | MIMAT0005931              | hsa-miR-302e    | UAAGUGCUCUCCAUGCUU        |
| hsa-miR-338-5p | 20                       | MIMAT0004701              | hsa-miR-338-5p  | AACAUAUCCUGGUGCUGAGUG     |
| hsa-miR-34a    | 20                       | MIMAT0000255              | hsa-miR-34a-5p  | UGGCAGUGUCUUAAGCUGGUUGU   |
| hsa-miR-34c-5p | 20                       | MIMAT0000686              | hsa-miR-34c-5p  | AGGCAGUGUAGUUAGCUGAUUGC   |
| hsa-miR-371-5p | 20                       | MIMAT0004687              | hsa-miR-371a-5p | ACUCAAACUGUGGGGGCACU      |
| hsa-miR-373    | 20                       | MIMAT0000726              | hsa-miR-373-3p  | GAAGUGCUCGAUUUUUGGGGUGU   |
| hsa-miR-449a   | 20                       | MIMAT0001541              | hsa-miR-449a    | UGGCAGUGUAUUGUUAGCUGGU    |
| hsa-miR-449b   | 20                       | MIMAT0003327              | hsa-miR-449b-5p | AGGCAGUGUAUUGUUAGCUGGC    |
| hsa-miR-501-3p | 20                       | MIMAT0004774              | hsa-miR-501-3p  | AAUGCACCCGGGCAAGGAUUCU    |



**Supplementary Table S5 (continued)**

| name (query)    | miRBase release (update) | accession number (update) | name (update)   | sequence (update)       |
|-----------------|--------------------------|---------------------------|-----------------|-------------------------|
| hsa-miR-502-3p  | 20                       | MIMAT0004775              | hsa-miR-502-3p  | AAUGCACCUGGGCAAGGAUUCA  |
| hsa-miR-505     | 20                       | MIMAT0002876              | hsa-miR-505-3p  | CGUCAACACUUGCUGGUUUCU   |
| hsa-miR-513a-3p | 20                       | MIMAT0004777              | hsa-miR-513a-3p | UAAAUUUCACCUUUCUGAGAAGG |
| hsa-miR-518a-5p | 20                       | MIMAT0005457              | hsa-miR-518a-5p | CUGCAAAGGGAAGCCCUUUC    |
| hsa-miR-519d    | 20                       | MIMAT0002853              | hsa-miR-519d-3p | CAAAGUGCCUCCCUUAGAGUG   |
| hsa-miR-520d-3p | 20                       | MIMAT0002856              | hsa-miR-520d-3p | AAAGUGCUUCUCUUGGUGGGU   |
| hsa-miR-520g    | 20                       | MIMAT0002858              | hsa-miR-520g-3p | ACAAAGUGCUUCCCUUAGAGUGU |
| hsa-miR-520h    | 20                       | MIMAT0002867              | hsa-miR-520h    | ACAAAGUGCUUCCCUUAGAGU   |
| hsa-miR-527     | 20                       | MIMAT0002862              | hsa-miR-527     | CUGCAAAGGGAAGCCCUUUC    |
| hsa-miR-543     | 20                       | MIMAT0004954              | hsa-miR-543     | AAACAUUCGCGGUGCACUUCU   |
| hsa-miR-548a-5p | 20                       | MIMAT0004803              | hsa-miR-548a-5p | AAAAGUAAUUGCGAGUUUACC   |
| hsa-miR-548b-5p | 20                       | MIMAT0004798              | hsa-miR-548b-5p | AAAAGUAAUUGUGGUUUUGGCC  |
| hsa-miR-548c-3p | 20                       | MIMAT0003285              | hsa-miR-548c-3p | CAAAAUCUCAAUUACUUUUGC   |
| hsa-miR-548c-5p | 20                       | MIMAT0004806              | hsa-miR-548c-5p | AAAAGUAAUUGCGGUUUUUGCC  |
| hsa-miR-548d-5p | 20                       | MIMAT0004812              | hsa-miR-548d-5p | AAAAGUAAUUGUGGUUUUUGCC  |
| hsa-miR-548h    | 20                       | MIMAT0005928              | hsa-miR-548h-5p | AAAAGUAAUCGCGGUUUUUGUC  |
| hsa-miR-548i    | 20                       | MIMAT0005935              | hsa-miR-548i    | AAAAGUAAUUGCGGAUUUUGCC  |
| hsa-miR-548j    | 20                       | MIMAT0005875              | hsa-miR-548j-5p | AAAAGUAAUUGCGGUCUUUGGU  |
| hsa-miR-548l    | 20                       | MIMAT0005889              | hsa-miR-548l    | AAAAGUAAUUGCGGGUUUUGUC  |
| hsa-miR-548o    | 20                       | MIMAT0005919              | hsa-miR-548o-3p | CCAAAACUGCAGUUACUUUUGC  |
| hsa-miR-559     | 20                       | MIMAT0003223              | hsa-miR-559     | UAAAGUAAUAUGCACCAAAA    |
| hsa-miR-561     | 20                       | MIMAT0003225              | hsa-miR-561-3p  | CAAAGUUUAAGAUCUUGAAGU   |
| hsa-miR-767-5p  | 20                       | MIMAT0003882              | hsa-miR-767-5p  | UGCACCAUGGUUGUCUGAGCAUG |
| hsa-miR-888     | 20                       | MIMAT0004916              | hsa-miR-888-5p  | UACUCAAAAAGCUGUCAGUCA   |
| hsa-miR-93      | 20                       | MIMAT0000093              | hsa-miR-93-5p   | CAAAGUGCUGUUCGUGCAGGUAG |

**Supplementary Table S6: Results from two indepecent MYCN-3'UTR library screens.**

av.: average; st.dev.: standard deviation; int. score: interaction score

| miRNA name     | accession number | sequence                 | av. int. score | st.dev. int. score | MirTarget2 |
|----------------|------------------|--------------------------|----------------|--------------------|------------|
| hsa-miR-449b   | MIMAT0003327     | AGGCAGUGUAUUGUUAGCUGGC   | -5.92          | 0.29               | x          |
| hsa-miR-767-5p | MIMAT0003882     | UGCACCAUGGUUGUCUGAGCAUG  | -5.44          | 0.67               | x          |
| hsa-miR-34c    | MIMAT0000686     | AGGCAGUGUAGUUAGCUGAUUGC  | -5.02          | 0.08               |            |
| hsa-miR-98     | MIMAT0000096     | UGAGGUAGUAAGUUGUAUUGUU   | -4.78          | 0.58               |            |
| hsa-miR-449    | MIMAT0001541     | UGGCAGUGUAUUGUUAGCUGGU   | -4.71          | 1.10               | x          |
| hsa-let-7b     | MIMAT0000063     | UGAGGUAGUAGGUUGUGUGGUU   | -4.48          | 0.25               |            |
| hsa-let-7f     | MIMAT0000067     | UGAGGUAGUAGAUUGUAUAGUU   | -4.33          | 0.35               |            |
| hsa-let-7c     | MIMAT0000064     | UGAGGUAGUAGGUUGUAUGGUU   | -4.05          | 0.73               |            |
| hsa-let-7a     | MIMAT0000062     | UGAGGUAGUAGGUUGUAUAGUU   | -4.02          | 0.44               |            |
| hsa-let-7i     | MIMAT0000415     | UGAGGUAGUAGUUUGUCUGU     | -3.97          | 0.73               |            |
| hsa-let-7g     | MIMAT0000414     | UGAGGUAGUAGUUUGUACAGU    | -3.87          | 0.11               |            |
| hsa-miR-34a    | MIMAT0000255     | UGGCAGUGUCUUAGCUGGUUGUU  | -3.64          | 0.62               | x          |
| hsa-miR-34b    | MIMAT0000685     | UAGGCAGUGUCAUUAGCUGAUUG  | -3.63          | 0.08               |            |
| hsa-let-7e     | MIMAT0000066     | UGAGGUAGGAGGUUGUAUAGU    | -3.52          | 0.13               |            |
| hsa-miR-29b    | MIMAT0000100     | UAGCACCAUUUGAAAUCAGUGUU  | -3.52          | 0.89               |            |
| hsa-miR-101    | MIMAT0000099     | UACAGUACUGUGAAACUGAAG    | -3.49          | 0.77               | x          |
| hsa-miR-571    | MIMAT0003236     | UGAGUUGGCCAUCUGAGUGAG    | -3.35          | 1.14               |            |
| hsa-let-7d     | MIMAT0000065     | AGAGGUAGUAGGUUGCAUAGU    | -3.20          | 0.12               |            |
| hsa-miR-29c    | MIMAT0000681     | UAGCACCAUUUGAAAUCGGU     | -3.20          | 0.10               |            |
| hsa-miR-19b    | MIMAT0000074     | UGUGCAAAUCCAUGCAAAACUGA  | -3.09          | 0.58               | x          |
| hsa-miR-29a    | MIMAT0000086     | UAGCACCAUCUGAAAUCGGUU    | -3.08          | 0.74               |            |
| hsa-miR-770-5p | MIMAT0003948     | UCCAGUACCACGUGUCAGGGCCA  | -3.01          | 1.33               |            |
| hsa-miR-202    | MIMAT0002811     | AGAGGUUAUAGGGCAUGGGAAAA  | -2.96          | 0.35               | x          |
| hsa-miR-494    | MIMAT0002816     | UGAAACAUAACGGGAAACCUCUU  | -2.74          | 0.33               |            |
| hsa-miR-19a    | MIMAT0000073     | UGUGCAAAUCUAUGCAAAACUGA  | -2.74          | 0.65               | x          |
| hsa-miR-193a   | MIMAT0000459     | AACUGGCCUACAAAGUCCAG     | -2.47          | 0.54               |            |
| hsa-miR-193b   | MIMAT0002819     | AACUGGCCCUCAAAGUCCCGCUU  | -2.37          | 0.38               |            |
| hsa-miR-617    | MIMAT0003286     | AGACUCCCAUUUGAAGGUGGC    | -2.21          | 0.39               |            |
| hsa-miR-206    | MIMAT0000462     | UGGAAUGUAAGGAAGUGUGUGG   | -2.18          | 1.07               |            |
| hsa-miR-485-3p | MIMAT0002176     | GUCAUACACGGCUCUCCUCUCU   | -1.89          | 0.06               |            |
| hsa-miR-582    | MIMAT0003247     | UUACAGUUGUUAACCAGUUACU   | -1.85          | 1.13               |            |
| hsa-miR-346    | MIMAT0000773     | UGUCUGCCCCGCAUGCCUGCCUCU | -1.48          | 0.20               |            |

Supplementary Table S6 (continued)

| miRNA name   | accession number | sequence                  | av. int. score | st.dev. int. score | MirTarget2 |
|--------------|------------------|---------------------------|----------------|--------------------|------------|
| hsa-miR-9*   | MIMAT0000442     | UAAAGCUAGAUAAACCGAAAGU    | -1.46          | 0.76               |            |
| hsa-miR-558  | MIMAT0003222     | UGAGCUGCUGUACCAAAAU       | -1.43          | 0.30               |            |
| hsa-miR-523  | MIMAT0002840     | AACGCGCUUCCCUAUAGAGGG     | -1.41          | 1.23               |            |
| hsa-miR-342  | MIMAT0000753     | UCUCACACAGAAAUCGCACCCGUC  | -1.33          | 0.68               |            |
| hsa-miR-552  | MIMAT0003215     | AACAGGUGACUGGUUAGACAA     | -1.32          | 1.20               |            |
| hsa-miR-560  | MIMAT0003224     | GCGUGCGCCGCCGCCGCC        | -1.25          | 0.67               |            |
| hsa-miR-181c | MIMAT0000258     | AACAUUCAACCUUGUCGGUGAGU   | -1.20          | 0.11               |            |
| hsa-miR-196a | MIMAT0000226     | UAGGUAGUUUCAUGUUGUUGG     | -1.16          | 0.45               |            |
| hsa-miR-433  | MIMAT0001627     | AUCAUGAUGGGCUCCUCGGUGU    | -1.14          | 1.55               |            |
| hsa-miR-134  | MIMAT0000447     | UGUGACUGGUUGACCAGAGGG     | -1.12          | 0.04               |            |
| hsa-miR-550  | MIMAT0003257     | UGUCUUAUCUCCUCAGGCACAU    | -1.10          | 0.54               |            |
| hsa-miR-381  | MIMAT0000736     | UAUACAAGGGCAAGCUCUCUGU    | -1.09          | 0.27               |            |
| hsa-miR-598  | MIMAT0003266     | UACGUCAUCGUUGUCAUCGUCA    | -1.02          | 0.33               |            |
| hsa-miR-126* | MIMAT0000444     | CAUUUUUACUUUUGGUACGCG     | -1.01          | 0.17               |            |
| hsa-miR-30d  | MIMAT0000245     | UGUAAACAUCUCCCGACUGGAAG   | -1.00          | 0.72               |            |
| hsa-miR-488  | MIMAT0002804     | CCCAGAUAAUGGCACUCUCA      | -1.00          | 0.29               |            |
| hsa-miR-487a | MIMAT0002178     | AAUCAUACAGGGACAUCAGUU     | -0.99          | 0.88               |            |
| hsa-miR-370  | MIMAT0000722     | GCCUGCUGGGUGGAACCUUGG     | -0.96          | 0.52               |            |
| hsa-miR-181d | MIMAT0002821     | AACAUUCAUUGUUGUCGGUGGGUU  | -0.95          | 0.03               |            |
| hsa-miR-638  | MIMAT0003308     | AGGGAUCGCGGGCGGGUGGCGGCCU | -0.93          | 1.57               |            |
| hsa-miR-198  | MIMAT0000228     | GGUCCAGAGGGGAGAUAGG       | -0.93          | 0.28               |            |
| hsa-miR-616  | MIMAT0003284     | ACUCAAACCCUUCAGUGACUU     | -0.91          | 0.87               |            |
| hsa-miR-518e | MIMAT0002861     | AAAGCGCUUCCCUUCAGAGUGU    | -0.90          | 0.05               |            |
| hsa-miR-100  | MIMAT0000098     | AACCCGUAGAUCCGAACUUGUG    | -0.89          | 0.12               |            |
| hsa-miR-651  | MIMAT0003321     | UUUAGGAUAAGCUUGACUUUUG    | -0.87          | 0.88               |            |
| hsa-miR-505  | MIMAT0002876     | GUCAACACUUGCUGGUUCCUC     | -0.83          | 0.68               | x          |
| hsa-miR-432  | MIMAT0002814     | UCUUGGAGUAGGUCAUUGGGUGG   | -0.82          | 0.28               |            |
| hsa-miR-450  | MIMAT0001545     | UUUUUGCGAUGUGUUCUAAUA     | -0.82          | 0.85               |            |
| hsa-miR-520a | MIMAT0002834     | AAAGUGCUCUCCCUUUGGACUGU   | -0.80          | 0.40               |            |
| hsa-miR-561  | MIMAT0003225     | CAAAGUUUAAGAUCUUGAAGU     | -0.80          | 0.17               |            |
| hsa-miR-20a  | MIMAT0000075     | UAAAGUGCUUAUAGUGCAGGUAG   | -0.79          | 0.41               | x          |
| hsa-miR-335  | MIMAT0000765     | UCAAGAGCAAUAACGAAAAAUGU   | -0.78          | 0.18               |            |
| hsa-miR-30b  | MIMAT0000420     | UGUAAACAUCUACACUCAGCU     | -0.78          | 0.09               |            |

Supplementary Table S6 (continued)

| miRNA name     | accession number | sequence                | av. int. score | st.dev. int. score | MirTarget2 |
|----------------|------------------|-------------------------|----------------|--------------------|------------|
| hsa-miR-627    | MIMAT0003296     | GUGAGUCUCUAAGAAAAGAGGA  | -0.78          | 0.58               |            |
| hsa-miR-649    | MIMAT0003319     | AAACCUGUGUUGUUCAAGAGUC  | -0.75          | 0.29               |            |
| hsa-miR-106b   | MIMAT0000680     | UAAAGUGCUGACAGUGCAGAU   | -0.74          | 1.38               | x          |
| hsa-miR-365    | MIMAT0000710     | UAAUGCCCCUAAAAUCCUUAU   | -0.73          | 0.21               |            |
| hsa-miR-615    | MIMAT0003283     | UCCGAGCCUGGGUCUCCUCU    | -0.73          | 0.57               |            |
| hsa-miR-566    | MIMAT0003230     | GGGCGCCUGUGAUCCCAAC     | -0.71          | 0.38               |            |
| hsa-miR-500    | MIMAT0002871     | AUGCACCUGGGCAAGGAUUCUG  | -0.70          | 1.37               |            |
| hsa-miR-626    | MIMAT0003295     | AGCUGUCUGAAAAUGUCUU     | -0.70          | 0.53               |            |
| hsa-miR-611    | MIMAT0003279     | GCGAGGACCCUCGGGGUCUGAC  | -0.65          | 0.82               |            |
| hsa-miR-572    | MIMAT0003237     | GUCCGCUCGGCGGUGGCCCA    | -0.65          | 0.28               |            |
| hsa-miR-423    | MIMAT0001340     | AGCUCGGUCUGAGGCCCCUCAG  | -0.64          | 0.32               |            |
| hsa-miR-518f   | MIMAT0002842     | AAAGCGCUUCUCUUUAGAGGA   | -0.63          | 0.29               |            |
| hsa-miR-373*   | MIMAT0000725     | ACUCAAAUUGGGGCGCUUCC    | -0.62          | 0.94               |            |
| hsa-miR-424    | MIMAT0001341     | CAGCAGCAAUUCAUGUUUUGAA  | -0.62          | 0.23               |            |
| hsa-miR-20b    | MIMAT0001413     | CAAAGUGCUCAUAGUGCAGGUAG | -0.62          | 0.09               | x          |
| hsa-miR-524*   | MIMAT0002849     | CUACAAAGGGAAGCACUUUCUC  | -0.61          | 0.47               |            |
| hsa-miR-21     | MIMAT0000076     | UAGCUUAUCAGACUGAUGUUGA  | -0.60          | 0.08               |            |
| hsa-miR-518a   | MIMAT0002863     | AAAGCGCUUCCUUUGCUGGA    | -0.60          | 0.14               |            |
| hsa-miR-559    | MIMAT0003223     | UAAAGUAAAUAUGCACCAAAA   | -0.59          | 0.53               | x          |
| hsa-miR-596    | MIMAT0003264     | AAGCCUGCCCGGCUCCUCGGG   | -0.59          | 0.28               |            |
| hsa-miR-384    | MIMAT0001075     | AUUCCUAGAAAUUGUJCAUA    | -0.58          | 0.27               |            |
| hsa-miR-200a*  | MIMAT0001620     | CAUCUUACCGGACAGUGCUGGA  | -0.58          | 2.14               |            |
| hsa-miR-369-3p | MIMAT0000721     | AAUAAUACAUGGUUGAUCUUU   | -0.57          | 0.96               |            |
| hsa-miR-484    | MIMAT0002174     | UCAGGCUCAGUCCCCUCCGAU   | -0.57          | 0.42               |            |
| hsa-miR-580    | MIMAT0003245     | UUGAGAAUGAUGAAUCAUAGG   | -0.55          | 0.28               |            |
| hsa-miR-539    | MIMAT0003163     | GGAGAAAUUAUCCUUGGUGUGU  | -0.52          | 0.78               |            |
| hsa-miR-195    | MIMAT0000461     | UAGCAGCACAGAAAUUUGGC    | -0.51          | 0.18               |            |
| hsa-miR-1      | MIMAT0000416     | UGGAAUGUAAAGAAGUAUGUA   | -0.51          | 0.72               |            |
| hsa-miR-662    | MIMAT0003325     | UCCCACGUUGUGGCCCAGCAG   | -0.50          | #DIV/0!            |            |
| hsa-miR-200a   | MIMAT0000682     | UAACACUGUCUGGUAACGAUGU  | -0.47          | 0.70               |            |
| hsa-miR-30a-5p | MIMAT0000087     | UGUAAACAUCCUCGACUGGAAG  | -0.46          | 0.32               |            |
| hsa-miR-431    | MIMAT0001625     | UGUCUUGCAGGCCGUCAUGCA   | -0.46          | 1.03               |            |
| hsa-miR-517*   | MIMAT0002851     | CCUCUAGAUGGAAGCACUGUCU  | -0.45          | 1.23               |            |

Supplementary Table S6 (continued)

| miRNA name     | accession number | sequence                  | av. int. score | st.dev. int. score | MirTarget2 |
|----------------|------------------|---------------------------|----------------|--------------------|------------|
| hsa-miR-30c    | MIMAT0000244     | UGUAAACAUCUACACUCUCAGC    | -0.45          | 0.30               |            |
| hsa-miR-451    | MIMAT0001631     | AAACCGUUACCAUUACUGAGUUU   | -0.44          | 0.13               |            |
| hsa-miR-573    | MIMAT0003238     | CUGAAGUGAUGUGUAACUGAUCAG  | -0.44          | 0.66               |            |
| hsa-miR-506    | MIMAT0002878     | UAAGGCACCCUUCUGAGUAGA     | -0.44          | 1.43               |            |
| hsa-miR-660    | MIMAT0003338     | UACCAUUGCAUAUCGGAGUUG     | -0.43          | 1.53               |            |
| hsa-miR-620    | MIMAT0003289     | AUGGAGAUAGAUUAGAAAU       | -0.42          | 0.42               |            |
| hsa-miR-497    | MIMAT0002820     | CAGCAGCACACUGUGGUUUGU     | -0.42          | 0.33               |            |
| hsa-miR-606    | MIMAT0003274     | AAACUACUGAAAAUCAAGAU      | -0.41          | 0.45               |            |
| hsa-miR-520g   | MIMAT0002858     | ACAAAGUGCUUCCCUUUAGAGUGU  | -0.41          | 0.03               | x          |
| hsa-miR-524    | MIMAT0002850     | GAAGGCGCUUCCCUUUGGAGU     | -0.41          | 0.81               |            |
| hsa-miR-518c   | MIMAT0002848     | CAAAGCGCUUCUCUUUAGAGUG    | -0.40          | 0.06               |            |
| hsa-miR-520b   | MIMAT0002843     | AAAGUGCUUCCUUUAGAGGG      | -0.40          | 0.17               |            |
| hsa-miR-337    | MIMAT0000754     | UCCAGCUCCUAUAUGAUGCCUUU   | -0.40          | 0.26               |            |
| hsa-miR-203    | MIMAT0000264     | GUGAAUGUUUAGGACCACUAG     | -0.39          | 0.18               |            |
| hsa-miR-518c*  | MIMAT0002847     | UCUCUGGAGGGAAGCACUUUCUG   | -0.39          | 0.22               |            |
| hsa-miR-144    | MIMAT0000436     | UACAGUAUAGAUGAUGUACUAG    | -0.39          | 0.08               |            |
| hsa-miR-663    | MIMAT0003326     | AGGCGGGGCGCCGCGGACCGC     | -0.39          | 0.24               |            |
| hsa-miR-767-3p | MIMAT0003883     | UCUGCUCAUACCCCAUGGUUUCU   | -0.38          | 0.22               |            |
| hsa-miR-632    | MIMAT0003302     | GUGUCUGCUUCCUGUGGGA       | -0.38          | 0.15               |            |
| hsa-miR-563    | MIMAT0003227     | AGGUUGACAUACGUUUCCC       | -0.38          | 0.22               |            |
| hsa-miR-574    | MIMAT0003239     | CACGCUCAUGCACACACCCAC     | -0.37          | 0.34               |            |
| hsa-miR-26a    | MIMAT0000082     | UUCAAGUAAUCCAGGAUAGGC     | -0.37          | 1.49               |            |
| hsa-miR-532    | MIMAT0002888     | CAUGCCUUGAGUGUAGGACCGU    | -0.36          | 0.09               |            |
| hsa-miR-93     | MIMAT0000093     | AAAGUGCUGUUCGUGCAGGUAG    | -0.36          | 0.61               |            |
| hsa-miR-145    | MIMAT0000437     | GUCCAGUUUCCAGGAAUCCCUU    | -0.36          | 0.22               |            |
| hsa-miR-593    | MIMAT0003261     | AGGCACCAGCCAGGCAUUGCUCAGC | -0.34          | 0.91               |            |
| hsa-miR-425-5p | MIMAT0003393     | AAUGACACGAUCACUCCCGUUGA   | -0.34          | 0.03               |            |
| hsa-miR-421    | MIMAT0003339     | AUCAACAGACAUUAAUUGGGCGC   | -0.34          | 0.16               |            |
| hsa-miR-520c   | MIMAT0002846     | AAAGUGCUUCCUUUAGAGGGUU    | -0.34          | 0.02               |            |
| hsa-miR-125a   | MIMAT0000443     | UCCUGAGACCCUUUAACCUUGU    | -0.33          | 0.16               |            |
| hsa-miR-618    | MIMAT0003287     | AAACUCUACUUGUCCUUCUGAGU   | -0.33          | 0.89               |            |
| hsa-miR-382    | MIMAT0000737     | GAAGUUGUUCGUGGUGGAUUCG    | -0.33          | 0.22               |            |
| hsa-miR-658    | MIMAT0003336     | GGCGGAGGGAAGUAGGUCCGUUGGU | -0.33          | 0.13               |            |

Supplementary Table S6 (continued)

| miRNA name     | accession number | sequence                 | av. int. score | st.dev. int. score | MirTarget2 |
|----------------|------------------|--------------------------|----------------|--------------------|------------|
| hsa-miR-218    | MIMAT0000275     | UUGUGCUUGAUCUAACCAUGU    | -0.33          | 0.05               |            |
| hsa-miR-592    | MIMAT0003260     | UUGUGUCAUAUAGCGAUGAUGU   | -0.33          | 0.15               |            |
| hsa-miR-614    | MIMAT0003282     | GAACGCCUGUUCUUGCCAGGUGG  | -0.33          | 0.69               |            |
| hsa-miR-302a*  | MIMAT0000683     | UAAACGUGGAUGUACUUGCUUU   | -0.32          | 0.52               |            |
| hsa-miR-155    | MIMAT0000646     | UUAAUGCUAAUCGUGAUAGGGG   | -0.31          | 0.38               |            |
| hsa-miR-30e-5p | MIMAT0000692     | UGUAAACAUCUUGACUGGA      | -0.31          | 0.11               |            |
| hsa-miR-375    | MIMAT0000728     | UUUGUUCGUUCGGCUCGCGUGA   | -0.31          | 0.05               |            |
| hsa-miR-17-5p  | MIMAT0000070     | CAAAGUGCUUACAGUGCAGGUAGU | -0.31          | 1.35               | x          |
| hsa-miR-9      | MIMAT0000441     | UCUUUGGUUAUCUAGCUGUAUGA  | -0.31          | 0.09               |            |
| hsa-miR-10a    | MIMAT0000253     | UACCCUGUAGAUCCGAUUUGUG   | -0.30          | 0.41               |            |
| hsa-miR-548b   | MIMAT0003254     | CAAGAACCUCAGUUGCUUUUGU   | -0.29          | 0.05               |            |
| hsa-miR-22     | MIMAT0000077     | AAGCUGCCAGUUGAAGAACUGU   | -0.29          | 0.57               |            |
| hsa-miR-340    | MIMAT0000750     | UCCGUCUCAGUUACUUUAUAGCC  | -0.29          | 1.07               |            |
| hsa-miR-515-5p | MIMAT0002826     | UUCUCCAAAAGAAAGCACUUUCUG | -0.29          | 0.75               |            |
| hsa-miR-586    | MIMAT0003252     | UAUGCAUUGUAUUUUUAGGUCC   | -0.28          | 0.40               |            |
| hsa-miR-526c   | MIMAT0002831     | CUCUAGAGGGAAGCGCUUUCUGUU | -0.28          | 0.26               |            |
| hsa-miR-564    | MIMAT0003228     | AGGCACGGUGUCAGCAGGC      | -0.27          | 0.39               |            |
| hsa-miR-200c   | MIMAT0000617     | UAAUACUGCCGGGUAUUGAUGG   | -0.26          | 0.80               |            |
| hsa-miR-196b   | MIMAT0001080     | UAGGUAGUUUCCUGUUGUUGG    | -0.26          | 0.34               |            |
| hsa-miR-584    | MIMAT0003249     | UUAUGGUUUGCCUGGGACUGAG   | -0.26          | 1.91               |            |
| hsa-miR-324-5p | MIMAT0000761     | CGCAUCCCUAGGGCAUUGGUGU   | -0.24          | 0.54               |            |
| hsa-miR-520a*  | MIMAT0002833     | CUCCAGAGGGAAGUACUUUCU    | -0.24          | 0.32               |            |
| hsa-miR-525    | MIMAT0002838     | CUCCAGAGGGAUGCACUUUCU    | -0.23          | 0.24               |            |
| hsa-miR-516-5p | MIMAT0002859     | CAUCUGGAGGUAAGAAGCACUUU  | -0.23          | 1.95               |            |
| hsa-miR-628    | MIMAT0003297     | UCUAGUAAGAGUGGCAGUCG     | -0.23          | 0.01               |            |
| hsa-miR-518b   | MIMAT0002844     | CAAAGCGCUCCCUUUAGAGGU    | -0.23          | 0.23               |            |
| hsa-miR-33     | MIMAT0000091     | GUGCAUUGUAGUUGCAUUG      | -0.22          | 0.03               |            |
| hsa-miR-330    | MIMAT0000751     | GCAAAGCACACGGCCUGCAGAGA  | -0.22          | 0.23               |            |
| hsa-miR-106a   | MIMAT0000103     | AAAAGUGCUUACAGUGCAGGUAGC | -0.21          | 0.30               | x          |
| hsa-miR-453    | MIMAT0001630     | GAGGUUGUCCGUGGUGAGUUCG   | -0.21          | 0.68               |            |
| hsa-miR-492    | MIMAT0002812     | AGGACCUGCGGGACAAGAUUCUU  | -0.21          | 0.08               |            |
| hsa-miR-602    | MIMAT0003270     | GACACGGGCGACAGCUGCGGCC   | -0.20          | 0.21               |            |
| hsa-miR-214    | MIMAT0000271     | ACAGCAGGCACAGACAGGCAG    | -0.20          | 1.24               |            |

Supplementary Table S6 (continued)

| miRNA name     | accession number | sequence                     | av. int. score | st.dev. int. score | MirTarget2 |
|----------------|------------------|------------------------------|----------------|--------------------|------------|
| hsa-miR-595    | MIMAT0003263     | GAAGUGUGCCGUGGUGUGUCU        | -0.20          | 0.72               |            |
| hsa-miR-643    | MIMAT0003313     | ACUUGUAUGCUAGCUCAGGUAG       | -0.19          | 0.21               |            |
| hsa-miR-801    | MIMAT0004209     | GAUUGCUCUGCGUGCGGAAUCGAC     | -0.19          | 0.77               |            |
| hsa-miR-520h   | MIMAT0002867     | ACAAAGUGCUUCCCUUUAGAGU       | -0.18          | 0.30               | x          |
| hsa-miR-518f*  | MIMAT0002841     | CUCUAGAGGGAAGCACUUUCUCU      | -0.18          | 0.26               |            |
| hsa-miR-545    | MIMAT0003165     | AUCAGCAAACAUUUUAUUGUGUG      | -0.18          | 0.24               |            |
| hsa-miR-637    | MIMAT0003307     | ACUGGGGGCUUUCGGGCUCUGCGU     | -0.18          | 0.25               |            |
| hsa-miR-448    | MIMAT0001532     | UUGCAUAUGUAGGAUGUCCAU        | -0.18          | 0.32               |            |
| hsa-miR-526a   | MIMAT0002845     | CUCUAGAGGGAAGCACUUUCU        | -0.17          | 0.37               |            |
| hsa-miR-567    | MIMAT0003231     | AGUAUGUUCUCCAGGACAGAAC       | -0.17          | 0.09               |            |
| hsa-miR-30a-3p | MIMAT0000088     | CUUUCAGUCGGAUGUUUGCAGC       | -0.17          | 0.55               |            |
| hsa-miR-425-3p | MIMAT0001343     | AUCGGGAAUGUCGUGUCCGCC        | -0.17          | 0.87               |            |
| hsa-miR-361    | MIMAT0000703     | UUAUCAGAAUCUCCAGGGGUAC       | -0.16          | 0.24               |            |
| hsa-miR-200b   | MIMAT0000318     | UAAUACUGCCUGGUAUAUGAC        | -0.16          | 0.48               |            |
| hsa-miR-184    | MIMAT0000454     | UGGACGGAGAACUGAUAAAGGU       | -0.13          | 0.27               |            |
| hsa-miR-768-3p | MIMAT0003947     | UCACAAUGCUGACACUCAAACUGCUGAC | -0.13          | 2.19               | x          |
| hsa-miR-487b   | MIMAT0003180     | AAUCGUACAGGGUCAUCCACUU       | -0.12          | 0.33               |            |
| hsa-miR-15a    | MIMAT0000068     | UAGCAGCACAUAAUGGUUUGUG       | -0.12          | 0.40               |            |
| hsa-miR-191    | MIMAT0000440     | CAACGGAAUCCCAAAGCAGCU        | -0.12          | 0.63               |            |
| hsa-miR-181a   | MIMAT0000256     | AACAUUCAACGCUGUCGGUGAGU      | -0.12          | 0.03               |            |
| hsa-miR-10b    | MIMAT0000254     | UACCCUGUAGAACCGAAUUUGU       | -0.12          | 0.20               |            |
| hsa-miR-636    | MIMAT0003306     | UGUGCUUGCUCGUCCCGCCGCGAG     | -0.11          | 0.16               |            |
| hsa-miR-548a   | MIMAT0003251     | CAAACUGGCAAUUACUUUUGC        | -0.11          | 0.14               |            |
| hsa-miR-338    | MIMAT0000763     | UCCAGCAUCAGUGAUUUUGUUGA      | -0.11          | 1.17               |            |
| hsa-miR-25     | MIMAT0000081     | CAUUGCACUUGUCUCGGUCUGA       | -0.10          | 0.29               |            |
| hsa-miR-520e   | MIMAT0002825     | AAAGUGCUUCCUUUUUGAGGG        | -0.09          | 0.13               |            |
| hsa-miR-600    | MIMAT0003268     | ACUUACAGACAAGAGCCUUGCUC      | -0.09          | 0.35               |            |
| hsa-miR-296    | MIMAT0000690     | AGGGCCCCCCCUCAAUCCUGU        | -0.09          | 0.24               |            |
| hsa-miR-613    | MIMAT0003281     | AGGAAUGUCCUUCUUGCC           | -0.09          | 0.12               |            |
| hsa-miR-661    | MIMAT0003324     | UGCCUGGGUCUCUGGCCUGCGCGU     | -0.08          | 0.69               |            |
| hsa-miR-182    | MIMAT0000259     | UUUGGCAAUGGUAGAACUCACA       | -0.08          | 1.00               |            |
| hsa-miR-224    | MIMAT0000281     | CAAGUCACUAGUGGUUCCGUUUA      | -0.08          | 0.03               |            |
| hsa-miR-542-5p | MIMAT0003340     | UCGGGGAUCAUCAUGUCACGAG       | -0.08          | 0.53               |            |

Supplementary Table S6 (continued)

| miRNA name     | accession number | sequence                 | av. int. score | st.dev. int. score | MirTarget2 |
|----------------|------------------|--------------------------|----------------|--------------------|------------|
| hsa-miR-302b*  | MIMAT0000714     | ACUUUAACAUGGAAGUGCUUUCU  | -0.06          | 0.14               |            |
| hsa-miR-142-5p | MIMAT0000433     | CAUAAAGUAGAAAGCACUAC     | -0.05          | 0.18               |            |
| hsa-miR-378    | MIMAT0000731     | CUCCUGACUCCAGGUCCUGUGU   | -0.05          | 0.23               |            |
| hsa-miR-641    | MIMAT0003311     | AAAGACAUAGGAUAGAGUCACCUC | -0.05          | 0.84               |            |
| hsa-miR-498    | MIMAT0002824     | UUUCAAGCCAGGGGGCGUUUUUC  | -0.04          | 0.43               |            |
| hsa-miR-568    | MIMAT0003232     | AUGUAUAAAUGUAUACACAC     | -0.04          | 0.06               |            |
| hsa-miR-208    | MIMAT0000241     | AUAAGACGAGCAAAAAGCUUGU   | -0.03          | 0.80               |            |
| hsa-miR-99b    | MIMAT0000689     | CACCCGUAGAACCGACCUUGCG   | -0.02          | 0.52               |            |
| hsa-miR-18a    | MIMAT0000072     | UAAGGUGCAUCUAGUGCAGUA    | -0.02          | 0.41               |            |
| hsa-miR-383    | MIMAT0000738     | AGAUCAGAAGGUGAUUGUGGCU   | -0.01          | 0.49               |            |
| hsa-miR-607    | MIMAT0003275     | GUUCAAAUCCAGAUCUAUAAC    | -0.01          | 0.08               |            |
| hsa-miR-653    | MIMAT0003328     | UUGAAACAAUCUCUACUGAAC    | -0.01          | 0.30               |            |
| hsa-miR-30e-3p | MIMAT0000693     | CUUUCAGUCGGAUGUUUACAGC   | 0.00           | 0.00               |            |
| hsa-miR-455    | MIMAT0003150     | UAUGUGCCUUUGGACUACAUCG   | 0.00           | 0.07               |            |
| hsa-miR-363*   | MIMAT0003385     | CGGGUGGAUCACGAUGCAAUUU   | 0.01           | 2.28               |            |
| hsa-miR-133b   | MIMAT0000770     | UUGGUCCCCUUCAACCAGCUA    | 0.01           | 0.06               |            |
| hsa-miR-152    | MIMAT0000438     | UCAGUGCAUGACAGAACUUGGG   | 0.02           | 0.18               |            |
| hsa-miR-211    | MIMAT0000268     | UUCCCUUUGUCAUCCUUCGCCU   | 0.02           | 0.00               |            |
| hsa-miR-577    | MIMAT0003242     | UAGAUAAAUAUUGGUACCUG     | 0.04           | 0.40               |            |
| hsa-miR-542-3p | MIMAT0003389     | UGUGACAGAUUGAUAACUGAAA   | 0.04           | 0.10               |            |
| hsa-miR-551a   | MIMAT0003214     | GCGACCCACUCUUGGUUUCCA    | 0.04           | 0.13               |            |
| hsa-miR-376b   | MIMAT0002172     | AUCAUAGAGGAAAUCAUGUU     | 0.05           | 0.79               |            |
| hsa-miR-569    | MIMAT0003234     | AGUUAUGAAUCCUGGAAAGU     | 0.05           | 0.49               |            |
| hsa-miR-599    | MIMAT0003267     | GUUGUGUCAGUUUAUCAAAC     | 0.05           | 0.39               |            |
| hsa-miR-18b    | MIMAT0001412     | UAAGGUGCAUCUAGUGCAGUUA   | 0.06           | 0.62               |            |
| hsa-miR-412    | MIMAT0002170     | ACUUCACCUUGGUCCACUAGCCGU | 0.06           | 0.17               |            |
| hsa-miR-302c*  | MIMAT0000716     | UUUAACAUGGGGGUACCUGCUG   | 0.06           | 0.31               |            |
| hsa-miR-103    | MIMAT0000101     | AGCAGCAUUGUACAGGGCUAUGA  | 0.06           | 0.55               |            |
| hsa-miR-511    | MIMAT0002808     | GUGUCUUUUGCUCUGCAGUCA    | 0.06           | 0.20               |            |
| hsa-miR-491    | MIMAT0002807     | AGUGGGGAACCCUCCAUGAGGA   | 0.06           | 0.80               |            |
| hsa-miR-15b    | MIMAT0000417     | UAGCAGCAUCAUGGUUUACA     | 0.06           | 0.44               |            |
| hsa-miR-516-3p | MIMAT0002860     | UGCUCUUUCAGAGGGU         | 0.06           | 0.08               |            |
| hsa-miR-639    | MIMAT0003309     | AUCGUCGCGGUUGCGAGCGCUGU  | 0.06           | 0.09               |            |



Supplementary Table S6 (continued)

| miRNA name     | accession number | sequence                  | av. int. score | st.dev. int. score | MirTarget2 |
|----------------|------------------|---------------------------|----------------|--------------------|------------|
| hsa-miR-589    | MIMAT0003256     | UCAGAACAAAUGCCGGUUCCCAGA  | 0.08           | 0.25               |            |
| hsa-miR-610    | MIMAT0003278     | UGAGCUAAAUGUGUGCUGGGA     | 0.08           | 0.23               |            |
| hsa-miR-345    | MIMAT0000772     | UGCUGACUCCUAGUCCAGGGC     | 0.09           | 0.89               |            |
| hsa-miR-16     | MIMAT0000069     | UAGCAGCACGUAAAUAUUGGCG    | 0.09           | 0.29               |            |
| hsa-miR-409-5p | MIMAT0001638     | AGGUUACCCGAGCAACUUUGCA    | 0.10           | 0.44               |            |
| hsa-miR-554    | MIMAT0003217     | GCUAGUCCUGACUCAGCCAGU     | 0.10           | 0.32               |            |
| hsa-miR-220    | MIMAT0000277     | CCACACCGUAUCUGACACUUU     | 0.10           | 0.62               |            |
| hsa-miR-520d   | MIMAT0002856     | AAAGUGCUUCUCUUUGGUGGGUU   | 0.10           | 0.31               |            |
| hsa-miR-518d   | MIMAT0002864     | CAAAGCGCUUCCCUUUGGAGC     | 0.10           | 0.15               |            |
| hsa-miR-623    | MIMAT0003292     | AUCCCUUGCAGGGGCUGUUGGGU   | 0.10           | 0.87               |            |
| hsa-miR-454-5p | MIMAT0003884     | ACCCUAUCAAUUUGUCUCUGC     | 0.11           | 0.06               |            |
| hsa-miR-181b   | MIMAT0000257     | AACAUUCAUUGCUGUCGGUGGG    | 0.11           | 0.16               |            |
| hsa-miR-588    | MIMAT0003255     | UUGGCCACAAUGGGUUAGAAC     | 0.11           | 0.50               |            |
| hsa-miR-622    | MIMAT0003291     | ACAGUCUGCUGAGGUUGGAGC     | 0.12           | 0.30               |            |
| hsa-miR-133a   | MIMAT0000427     | UUGGUCCCCUUAACCAGCUGU     | 0.12           | 0.03               |            |
| hsa-miR-612    | MIMAT0003280     | GCUGGGCAGGGCUUCUGAGCUCCUU | 0.12           | 0.16               |            |
| hsa-miR-409-3p | MIMAT0001639     | CGAAUGUUGCUCGGUGAACCCCU   | 0.12           | 0.95               |            |
| hsa-miR-604    | MIMAT0003272     | AGGCUGCGGAUUCAGGAC        | 0.12           | 0.73               |            |
| hsa-miR-520d*  | MIMAT0002855     | UCUACAAAGGGAAGCCCUUUCUG   | 0.12           | 0.34               |            |
| hsa-miR-320    | MIMAT0000510     | AAAAGCUGGGUUGAGAGGGCGAA   | 0.12           | 0.29               |            |
| hsa-miR-548c   | MIMAT0003285     | CAAAAUCUCAAUUACUUUUGC     | 0.12           | 0.39               | x          |
| hsa-miR-675    | MIMAT0004284     | UGGUGCGGAGAGGGCCACAGUG    | 0.13           | 0.32               |            |
| hsa-miR-23b    | MIMAT0000418     | AUCACAUUGCCAGGGAUUACC     | 0.14           | 0.42               |            |
| hsa-miR-503    | MIMAT0002874     | UAGCAGCGGGAACAGUUCUGCAG   | 0.14           | 0.46               |            |
| hsa-miR-153    | MIMAT0000439     | UUGCAUAGUCACAAAAGUGA      | 0.14           | 0.01               |            |
| hsa-miR-204    | MIMAT0000265     | UUCCCUUUGUCAUCCUAUGCCU    | 0.15           | 0.25               |            |
| hsa-miR-553    | MIMAT0003216     | AAAACGGUGAGAUUUUGUUUU     | 0.15           | 0.91               |            |
| hsa-miR-591    | MIMAT0003259     | AGACCAUGGGUUCUCAUUGU      | 0.15           | 0.02               |            |
| hsa-miR-146b   | MIMAT0002809     | UGAGAACUGAAUCCAUAAGGCU    | 0.16           | 0.54               |            |
| hsa-miR-136    | MIMAT0000448     | ACUCCAUUUGUUUUGAUGAUGGA   | 0.16           | 0.12               |            |
| hsa-miR-758    | MIMAT0003879     | UUUGUGACCUGGUCCACUAACC    | 0.17           | 0.01               |            |
| hsa-miR-212    | MIMAT0000269     | UAACAGUCUCCAGUCACGGCC     | 0.17           | 0.26               |            |
| hsa-miR-624    | MIMAT0003293     | UAGUACCAGUACCUUGUGUUCA    | 0.17           | 0.16               |            |

Supplementary Table S6 (continued)

| miRNA name     | accession number | sequence                 | av. int. score | st.dev. int. score | MirTarget2 |
|----------------|------------------|--------------------------|----------------|--------------------|------------|
| hsa-miR-514    | MIMAT0002883     | AUUGACACUUCUGUGAGUAG     | 0.18           | 0.65               |            |
| hsa-miR-219    | MIMAT0000276     | UGAUUGUCCAAACGCAAUUCU    | 0.18           | 0.25               |            |
| hsa-miR-668    | MIMAT0003881     | UGUCACUCGGCUCGGCCCACUAC  | 0.18           | 0.90               |            |
| hsa-miR-766    | MIMAT0003888     | ACUCCAGCCCCACAGCCUCAGC   | 0.18           | 1.55               |            |
| hsa-miR-548d   | MIMAT0003323     | CAAAAACCACAGUUUCUUUUGC   | 0.19           | 0.09               |            |
| hsa-miR-323    | MIMAT0000755     | GCACAUUACACGGUCGACCUCU   | 0.19           | 0.51               |            |
| hsa-miR-603    | MIMAT0003271     | CACACACUGCAAUUACUUUUGC   | 0.19           | 0.86               |            |
| hsa-miR-496    | MIMAT0002818     | AUUACAUGGCCAAUCUC        | 0.19           | 0.59               |            |
| hsa-miR-339    | MIMAT0000764     | UCCUGUCCUCCAGGAGCUCA     | 0.19           | 0.55               |            |
| hsa-miR-522    | MIMAT0002868     | AAA AUGGUUCCCUUAGAGUGUU  | 0.20           | 0.02               |            |
| hsa-miR-199a   | MIMAT0000231     | CCCAGUGUUCAGACUACCUGUUC  | 0.20           | 0.19               |            |
| hsa-miR-326    | MIMAT0000756     | CCUCUGGGCCCUUCCUCCAG     | 0.20           | 0.36               |            |
| hsa-miR-556    | MIMAT0003220     | GAUGAGCUCAUUGUAAUAUG     | 0.20           | 0.27               |            |
| hsa-miR-485-5p | MIMAT0002175     | AGAGGCUGGCCGUGAUGAAUUC   | 0.20           | 0.33               |            |
| hsa-miR-597    | MIMAT0003265     | UGUGUCACUCGAUGACCACUGU   | 0.20           | 0.75               |            |
| hsa-miR-362    | MIMAT0000705     | AAUCCUUGGAACCUAGGUGUGAGU | 0.20           | 0.62               |            |
| hsa-miR-141    | MIMAT0000432     | UAACACUGUCUGGUAAGAUGG    | 0.21           | 0.52               |            |
| hsa-miR-299-3p | MIMAT0000687     | UAUGUGGGAUGGUAACCGCUU    | 0.21           | 0.03               |            |
| hsa-miR-107    | MIMAT0000104     | AGCAGCAUUGUACAGGGCUAUC   | 0.21           | 0.08               |            |
| hsa-miR-525*   | MIMAT0002839     | GAAGGCGCUUCCCUUAGAGC     | 0.22           | 0.85               |            |
| hsa-miR-331    | MIMAT0000760     | GCCCCUGGGCCUAUCCUAGAA    | 0.22           | 0.53               |            |
| hsa-miR-210    | MIMAT0000267     | CUGUGCGUGUGACAGCGGCUGA   | 0.24           | 0.36               |            |
| hsa-miR-521    | MIMAT0002854     | AACGCACUCCCUUAGAGUGU     | 0.24           | 0.73               |            |
| hsa-miR-325    | MIMAT0000771     | CCUAGUAGGUGUCCAGUAAGUGU  | 0.25           | 0.97               |            |
| hsa-miR-191*   | MIMAT0001618     | GCUGCGCUUGGAUUUCGUCCCC   | 0.25           | 0.18               |            |
| hsa-miR-380-3p | MIMAT0000735     | UAUGUAAUAUGGUCCACAUCUU   | 0.25           | 0.38               |            |
| hsa-miR-125b   | MIMAT0000423     | UCCUGAGACCCUAACUUGUGA    | 0.26           | 0.47               |            |
| hsa-miR-138    | MIMAT0000430     | AGCUGGUGUUGUGAAUC        | 0.28           | 0.41               |            |
| hsa-miR-154*   | MIMAT0000453     | AAUCAUACACGGUUGACCUAUU   | 0.28           | 0.14               |            |
| hsa-miR-190    | MIMAT0000458     | UGAUUAUGUUUGAUUAUUAGGU   | 0.28           | 0.10               |            |
| hsa-miR-301    | MIMAT0000688     | CAGUGCAAUAGUAUUGUCAAGC   | 0.28           | 0.49               |            |
| hsa-miR-96     | MIMAT0000095     | UUUGGCACUAGCACAUUUUUGC   | 0.29           | 1.04               |            |
| hsa-miR-410    | MIMAT0002171     | AAUAUAACACAGAUGGCCUGU    | 0.29           | 0.35               |            |

Supplementary Table S6 (continued)

| miRNA name     | accession number | sequence                   | av. int. score | st.dev. int. score | MirTarget2 |
|----------------|------------------|----------------------------|----------------|--------------------|------------|
| hsa-miR-199a*  | MIMAT0000232     | UACAGUAGUCUGCACAUJGGUU     | 0.29           | 0.55               |            |
| hsa-miR-575    | MIMAT0003240     | GAGCCAGUJGGACAGGAGC        | 0.30           | 0.12               |            |
| hsa-miR-128b   | MIMAT0000676     | UCACAGUGAACCGGUCUCUUUC     | 0.30           | 0.02               |            |
| hsa-miR-302c   | MIMAT0000717     | UAAGUGCUUCCAUGUUUCAGUGG    | 0.30           | 0.22               |            |
| hsa-miR-590    | MIMAT0003258     | GAGCUUAUUCAUAAAAGUGCAG     | 0.31           | 0.37               |            |
| hsa-miR-302a   | MIMAT0000684     | UAAGUGCUUCCAUGUUUUGGUGA    | 0.32           | 0.57               |            |
| hsa-miR-489    | MIMAT0002805     | AGUGACAUCACAUAUACGGCAGC    | 0.32           | 0.32               |            |
| hsa-miR-31     | MIMAT0000089     | GGCAAGAUGCUGGCAUAGCUG      | 0.32           | 0.07               |            |
| hsa-miR-452    | MIMAT0001635     | UGUUJGCAGAGGAAACUGAGAC     | 0.32           | 1.29               |            |
| hsa-miR-297    | MIMAT0004450     | AUGUAUGUGUGCAUGUGCAUG      | 0.32           | 0.36               |            |
| hsa-miR-621    | MIMAT0003290     | GGCUAGCAACAGCGCUUACCU      | 0.33           | 0.67               |            |
| hsa-miR-299-5p | MIMAT0002890     | UGGUUUACCGUCCCACAUACAU     | 0.33           | 1.06               |            |
| hsa-miR-194    | MIMAT0000460     | UGUAACAGCAACUCCAUGUGGA     | 0.33           | 0.45               |            |
| hsa-miR-376a   | MIMAT0000729     | AUCAUAGAGGAAAUAUCCAGU      | 0.33           | 0.17               |            |
| hsa-miR-411    | MIMAT0003329     | UAGUAGACCGUAUAGCGUACG      | 0.36           | 0.19               |            |
| hsa-miR-486    | MIMAT0002177     | UCCUGUACUGAGCUGCCCCGAG     | 0.36           | 0.48               |            |
| hsa-miR-635    | MIMAT0003305     | ACUUGGGCACUGAAACAAUGUCC    | 0.38           | 0.52               |            |
| hsa-miR-99a    | MIMAT0000097     | AACCCGUAGAUCCGAUCUUGUG     | 0.39           | 0.86               |            |
| hsa-miR-493-3p | MIMAT0003161     | UGAAGGUCUACUGUGUGCCAG      | 0.39           | 1.27               |            |
| hsa-miR-768-5p | MIMAT0003946     | GUUGGAGGAUGAAAGUACGGAGUGAU | 0.40           | 1.57               |            |
| hsa-miR-374    | MIMAT0000727     | UUAUAAUACAACCGAUUAAGUG     | 0.40           | 0.38               |            |
| hsa-miR-608    | MIMAT0003276     | AGGGGUGGUGUUGGGACAGCUCCGU  | 0.41           | 0.20               |            |
| hsa-miR-185    | MIMAT0000455     | UGGAGAGAAAGGCAGUUC         | 0.41           | 0.26               |            |
| hsa-miR-216    | MIMAT0000273     | UAAUCUCAGCUGGCAACUGUG      | 0.41           | 0.71               |            |
| hsa-miR-515-3p | MIMAT0002827     | GAGUGCCUUCUUUUGGAGCGU      | 0.41           | 0.29               |            |
| hsa-miR-371    | MIMAT0000723     | GUGCCGCCAUUUUUGAGUGU       | 0.41           | 0.68               |            |
| hsa-miR-583    | MIMAT0003248     | CAAAGAGGAAGGUCCCAUJAC      | 0.42           | 0.22               |            |
| hsa-miR-659    | MIMAT0003337     | CUUGGUUCAGGGAGGGUCCCCA     | 0.42           | 0.18               |            |
| hsa-miR-95     | MIMAT0000094     | UUCAACGGGUUUUUUJUGAGCA     | 0.42           | 0.83               |            |
| hsa-miR-625    | MIMAT0003294     | AGGGGGAAAGUUCUJUGUCCU      | 0.43           | 0.60               |            |
| hsa-miR-495    | MIMAT0002817     | AAACAAACAUGGUGCACUUCUUU    | 0.44           | 0.57               |            |
| hsa-miR-499    | MIMAT0002870     | UUAAGACUJGCAGUGAUUUJAA     | 0.44           | 0.27               |            |
| hsa-miR-652    | MIMAT0003322     | AAUGGCGCCACUJGGGUJUGUCA    | 0.44           | 0.25               |            |

Supplementary Table S6 (continued)

| miRNA name     | accession number | sequence                  | av. int. score | st.dev. int. score | MirTarget2 |
|----------------|------------------|---------------------------|----------------|--------------------|------------|
| hsa-miR-7      | MIMAT0000252     | UGGAAGACUAGUGAUUUUGUUG    | 0.44           | 1.55               |            |
| hsa-miR-657    | MIMAT0003335     | GGCAGGUUCUCACCCUCUCUAGG   | 0.45           | 0.05               |            |
| hsa-miR-422a   | MIMAT0001339     | CUGGACUUAGGGUCAGAAGGCC    | 0.45           | 0.59               |            |
| hsa-miR-221    | MIMAT0000278     | AGCUACAUUGUCUGCUGGGUUUC   | 0.45           | 0.94               |            |
| hsa-miR-186    | MIMAT0000456     | CAAAGAAUUCUCCUUUUGGGCUU   | 0.45           | 0.10               |            |
| hsa-miR-205    | MIMAT0000266     | UCCUUCAUUCCACCGGAGUCUG    | 0.47           | 0.65               |            |
| hsa-miR-644    | MIMAT0003314     | AGUGUGGCUUUCUAGAGC        | 0.47           | 0.45               |            |
| hsa-miR-137    | MIMAT0000429     | UAUUGCUUAAGAAUACGCGUAG    | 0.47           | 0.61               |            |
| hsa-miR-549    | MIMAT0003333     | UGACAACUAUGGAUGAGCUCU     | 0.48           | 0.41               |            |
| hsa-miR-765    | MIMAT0003945     | UGGAGGAGAAGGAAGGUGAUG     | 0.48           | 0.67               |            |
| hsa-miR-619    | MIMAT0003288     | GACCUGGACAUGUUUGUGCCCAGU  | 0.49           | 0.10               |            |
| hsa-miR-150    | MIMAT0000451     | UCUCCAACCCUUGUACCAGUG     | 0.50           | 0.69               |            |
| hsa-miR-126    | MIMAT0000445     | UCGUACCGUGAGUAAUAAUGC     | 0.51           | 0.01               |            |
| hsa-miR-454-3p | MIMAT0003885     | UAGUGCAAUAUUGCUUAUAGGGUUU | 0.51           | 0.32               |            |
| hsa-miR-202*   | MIMAT0002810     | UUUCCUAUGCAUUAUCUUCUUU    | 0.52           | 0.64               | x          |
| hsa-miR-129    | MIMAT0000242     | CUUUUUGCGGUCUGGGCUUGC     | 0.52           | 0.19               |            |
| hsa-miR-579    | MIMAT0003244     | AUUCAUUUGGUAAUAAACCGCGAU  | 0.52           | 0.04               |            |
| hsa-miR-551b   | MIMAT0003233     | GCGACCAUACUUGGUUUCAG      | 0.53           | 0.61               |            |
| hsa-miR-124a   | MIMAT0000422     | UUAAGGCACGCGUGAAUGCCA     | 0.54           | 0.31               |            |
| hsa-miR-140    | MIMAT0000431     | AGUGGUUUUACCCUAUGGUAG     | 0.55           | #DIV/0!            |            |
| hsa-miR-189    | MIMAT0000079     | GUGCCUACUGAGCUGAUUCAGU    | 0.56           | 0.71               |            |
| hsa-miR-302b   | MIMAT0000715     | UAAGUGCUUCCAUGUUUAGUAG    | 0.56           | 0.10               |            |
| hsa-miR-769-3p | MIMAT0003887     | CUGGGAUCUCCGGGUCUUGGUU    | 0.56           | 0.35               |            |
| hsa-miR-324-3p | MIMAT0000762     | CCACUGCCCCAGGUGCUGCUGG    | 0.56           | 0.74               |            |
| hsa-miR-509    | MIMAT0002881     | UGAUUGGUACGUCUGUGGUAGA    | 0.57           | 0.67               |            |
| hsa-miR-429    | MIMAT0001536     | UAAUACUGUCUGGUAAAACCGU    | 0.58           | 0.81               |            |
| hsa-miR-143    | MIMAT0000435     | UGAGAUGAAGCACUGUAGCUCA    | 0.58           | 0.33               |            |
| hsa-miR-576    | MIMAT0003241     | AUUCUAAUUUCUCCACGUCUUUG   | 0.59           | 0.37               |            |
| hsa-miR-369-5p | MIMAT0001621     | AGAUCGACCGUGUUUAUUCGC     | 0.59           | 0.50               |            |
| hsa-miR-23a    | MIMAT0000078     | AUCACAUUGCCAGGGAUUUC      | 0.59           | 0.13               |            |
| hsa-miR-181a*  | MIMAT0000270     | ACCAUCGACCGUUGAUUGUACC    | 0.60           | 0.18               |            |
| hsa-miR-633    | MIMAT0003303     | CUAAUAGUAUCUACCACAAUAAA   | 0.60           | 0.50               |            |
| hsa-miR-372    | MIMAT0000724     | AAAGUGCUGCGACAUUUGAGCGU   | 0.61           | 0.10               |            |

Supplementary Table S6 (continued)

| miRNA name     | accession number | sequence                 | av. int. score | st.dev. int. score | MirTarget2 |
|----------------|------------------|--------------------------|----------------|--------------------|------------|
| hsa-miR-154    | MIMAT0000452     | UAGGUUAUCCGUGUUGCCUUCG   | 0.62           | 0.21               |            |
| hsa-miR-645    | MIMAT0003315     | UCUAGGCUGGUACUGCUGA      | 0.63           | 0.25               |            |
| hsa-miR-640    | MIMAT0003310     | AUGAUCCAGGAACCUGCCUCU    | 0.64           | 0.45               |            |
| hsa-miR-373    | MIMAT0000726     | GAAGUGCUUCGAUUUUGGGUGU   | 0.64           | 0.75               |            |
| hsa-miR-363    | MIMAT0000707     | AAUUGCACGGUAUCCAUCUGUA   | 0.65           | 0.15               |            |
| hsa-miR-223    | MIMAT0000280     | UGUCAGUUUGUCAAAUACCCC    | 0.67           | 0.29               |            |
| hsa-miR-562    | MIMAT0003226     | AAAGUAGCUGUACCAUUUGC     | 0.68           | 0.55               |            |
| hsa-miR-302d   | MIMAT0000718     | UAAGUGCUUCCAUGUUUGAGUGU  | 0.68           | 0.21               |            |
| hsa-miR-217    | MIMAT0000274     | UACUGCAUCAGGAACUGAUUGGAU | 0.69           | 0.07               |            |
| hsa-miR-601    | MIMAT0003269     | UGGUCUAGGAUUUGUUGGAGGAG  | 0.69           | 0.18               |            |
| hsa-miR-526b*  | MIMAT0002836     | AAAGUGCUUCCUUUUAGAGGC    | 0.69           | 0.02               |            |
| hsa-miR-648    | MIMAT0003318     | AAGUGUGCAGGGCACUGGU      | 0.69           | 0.84               |            |
| hsa-miR-510    | MIMAT0002882     | UACUCAGGAGAGUGGCAAUCACA  | 0.70           | 0.42               |            |
| hsa-miR-146a   | MIMAT0000449     | UGAGAACUGAAUUCCAUGGGUU   | 0.70           | 1.24               |            |
| hsa-miR-368    | MIMAT0000720     | ACAUAGAGGAAAUUCCACGUUU   | 0.70           | 0.19               |            |
| hsa-miR-769-5p | MIMAT0003886     | UGAGACCUCUGGGUUCUGAGCU   | 0.73           | 1.71               |            |
| hsa-miR-26b    | MIMAT0000083     | UUCAAGUAAUUCAGGAUAGGUU   | 0.73           | 0.07               |            |
| hsa-miR-570    | MIMAT0003235     | GAAAACAGCAAUUACCUUUGCA   | 0.73           | 0.43               |            |
| hsa-miR-183    | MIMAT0000261     | UAUGGCACUGGUAGAAUUCACUG  | 0.74           | 0.42               |            |
| hsa-miR-27b    | MIMAT0000419     | UUCACAGUGGCUAAGUUCUGC    | 0.74           | 0.88               |            |
| hsa-miR-581    | MIMAT0003246     | UCUUGUGUUCUCUAGAUCAGU    | 0.75           | 1.18               |            |
| hsa-miR-17-3p  | MIMAT0000071     | ACUGCAGUGAAGGCACUUGU     | 0.76           | 0.01               |            |
| hsa-miR-376a*  | MIMAT0003386     | GGUAGAUUCUCCUUCUAUGAG    | 0.77           | 0.76               |            |
| hsa-miR-377    | MIMAT0000730     | AUCACACAAAGGCAACUUUUGU   | 0.78           | 0.06               |            |
| hsa-miR-135a   | MIMAT0000428     | UAUGGCUUUUUAUUCUAUGUGA   | 0.78           | 0.06               |            |
| hsa-miR-634    | MIMAT0003304     | AACCAGCACCCCAACUUUGGAC   | 0.78           | 0.56               |            |
| hsa-miR-132    | MIMAT0000426     | UAACAGUCUACAGCCAUGGUCG   | 0.78           | 0.00               |            |
| hsa-miR-630    | MIMAT0003299     | AGUAUUCUGUACCAGGGAAGGU   | 0.79           | 0.00               |            |
| hsa-miR-33b    | MIMAT0003301     | GUGCAUUGCUGUUGCAUUGCA    | 0.79           | 1.84               |            |
| hsa-miR-517a   | MIMAT0002852     | AUCGUGCAUCCUUUAGAGUGUU   | 0.79           | 1.02               |            |
| hsa-miR-182*   | MIMAT0000260     | UGGUUCUAGACUUGCCAACUA    | 0.81           | 0.37               |            |
| hsa-miR-578    | MIMAT0003243     | CUUCUUGUGCUCUAGGAUUGU    | 0.82           | 0.48               |            |
| hsa-miR-490    | MIMAT0002806     | CAACCUGGAGGACUCCAUGCUG   | 0.83           | 0.54               |            |

Supplementary Table S6 (continued)

| miRNA name    | accession number | sequence                 | av. int. score | st.dev. int. score | MirTarget2 |
|---------------|------------------|--------------------------|----------------|--------------------|------------|
| hsa-miR-519d  | MIMAT0002853     | CAAAGUGCCUCCUUUAGAGUGU   | 0.84           | 0.54               | x          |
| hsa-miR-654   | MIMAT0003330     | UGGUGGGCCGAGAACAUGUGC    | 0.85           | 0.40               |            |
| hsa-miR-187   | MIMAT0000262     | UCGUGUCUUGUGUUGCAGCCG    | 0.85           | 0.10               |            |
| hsa-miR-631   | MIMAT0003300     | AGACCUGGCCCAGACCUCAGC    | 0.86           | 1.04               |            |
| hsa-miR-650   | MIMAT0003320     | AGGAGGCAGCGCUCUCAGGAC    | 0.87           | 0.22               |            |
| hsa-miR-139   | MIMAT0000250     | UCUACAGUGCACGUGUCU       | 0.87           | 0.02               |            |
| hsa-miR-526b  | MIMAT0002835     | CUCUUGAGGGAAGCACUUUCUGUU | 0.89           | 1.24               |            |
| hsa-miR-520f  | MIMAT0002830     | AAGUGCUUCCUUUAGAGGGUU    | 0.90           | 0.29               |            |
| hsa-miR-151   | MIMAT0000757     | ACUAGACUGAAGCUCCUUGAGG   | 0.90           | 0.61               |            |
| hsa-miR-519b  | MIMAT0002837     | AAAGUGCAUCCUUUAGAGGUUU   | 0.90           | 0.15               |            |
| hsa-miR-199b  | MIMAT0000263     | CCCAGUGUUUAGACUAUCUGUUC  | 0.90           | 0.10               |            |
| hsa-miR-507   | MIMAT0002879     | UUUUGCACUUUUGGAGUGAA     | 0.91           | 0.76               |            |
| hsa-miR-585   | MIMAT0003250     | UGGGCGUAUCUGUAUGCUA      | 0.91           | 0.99               |            |
| hsa-miR-422b  | MIMAT0000732     | CUGGACUUGGAGUCAGAAGGCC   | 0.91           | 1.12               |            |
| hsa-miR-24    | MIMAT0000080     | UGGCUCAGUUCAGCAGGAACAG   | 0.92           | 0.01               |            |
| hsa-miR-483   | MIMAT0002173     | UCACUCCUCUCCUCCCUCUUCU   | 0.92           | 0.01               |            |
| hsa-miR-646   | MIMAT0003316     | AAGCAGCUGCCUCUGAGGC      | 0.92           | 0.22               |            |
| hsa-miR-508   | MIMAT0002880     | UGAUUGUAGCCUUUUGGAGUAGA  | 0.94           | 1.98               |            |
| hsa-miR-135b  | MIMAT0000758     | UAUGGCUUUUCAUUCCUAUGUG   | 0.94           | 0.21               |            |
| hsa-miR-519e* | MIMAT0002828     | UUCUCCAAAAGGGAGCACUUUC   | 0.94           | 0.40               |            |
| hsa-miR-197   | MIMAT0000227     | UUCACCACCUUCUCCACCCAGC   | 0.95           | 0.44               |            |
| hsa-miR-629   | MIMAT0003298     | GUUCUCCCAACGUAAGCCCAGC   | 0.96           | 1.02               |            |
| hsa-miR-148a  | MIMAT0000243     | UCAGUGCACUACAGAACUUUGU   | 0.96           | 0.13               |            |
| hsa-miR-379   | MIMAT0000733     | UGGUAGACUAUGGAACGUA      | 0.97           | 0.25               |            |
| hsa-miR-565   | MIMAT0003229     | GGCUGGCUCGCGAUGUCUGUUU   | 0.97           | 1.36               |            |
| hsa-miR-367   | MIMAT0000719     | AAUUGCACUUUAGCAAUGGUGA   | 0.97           | 0.95               |            |
| hsa-miR-501   | MIMAT0002872     | AAUCCUUUGUCCCUGGGUGAGA   | 0.97           | 0.90               |            |
| hsa-miR-148b  | MIMAT0000759     | UCAGUGCAUCACAGAACUUUGU   | 0.97           | 0.55               |            |
| hsa-miR-328   | MIMAT0000752     | CUGGCCUCUCUGCCUUCCGU     | 1.01           | 0.80               |            |
| hsa-miR-27a   | MIMAT0000084     | UUCACAGUGGCUAAGUUCGCG    | 1.02           | 1.50               |            |
| hsa-miR-188   | MIMAT0000457     | CAUCCUUGCAUGGUGGAGGGU    | 1.03           | 0.17               |            |
| hsa-miR-605   | MIMAT0003273     | UAAAUCCAUUGGUGCCUUCUCCU  | 1.04           | 0.11               |            |
| hsa-miR-655   | MIMAT0003331     | AUAAUACAUGGUUAACCUCUUU   | 1.04           | 0.35               |            |

Supplementary Table S6 (continued)

| miRNA name     | accession number | sequence                 | av. int. score | st.dev. int. score | MirTarget2 |
|----------------|------------------|--------------------------|----------------|--------------------|------------|
| hsa-miR-513    | MIMAT0002877     | UUCACAGGGAGGUGUCAUUUUAU  | 1.06           | 1.23               |            |
| hsa-miR-557    | MIMAT0003221     | GUUUGCACGGGUGGGCCUUGUCU  | 1.09           | 0.54               |            |
| hsa-miR-452*   | MIMAT0001636     | UCAGUCUCAUCUGCAAAGAAG    | 1.11           | 0.73               |            |
| hsa-miR-512-5p | MIMAT0002822     | CACUCAGCCUUGAGGGCACUUUC  | 1.12           | 0.43               |            |
| hsa-miR-517c   | MIMAT0002866     | AUCGUGCAUCCUUUUAGAGUGU   | 1.14           | 0.32               |            |
| hsa-miR-105    | MIMAT0000102     | UCAA AUGCUCAGACUCCUGU    | 1.14           | 0.37               |            |
| hsa-miR-32     | MIMAT0000090     | UAUUGCACAUUACUAAGUUGC    | 1.19           | 0.32               |            |
| hsa-miR-502    | MIMAT0002873     | AUCCUUGCUAUCUGGGUGCUA    | 1.20           | 1.03               |            |
| hsa-miR-18a*   | MIMAT0002891     | ACUGCCCUAAGUGCUCUUCU     | 1.21           | 0.22               |            |
| hsa-miR-329    | MIMAT0001629     | AACACACCGGUUAACCUCUUU    | 1.21           | 1.06               |            |
| hsa-miR-609    | MIMAT0003277     | AGGGUGUUUCUCUCAUCUCU     | 1.22           | 0.06               |            |
| hsa-miR-142-3p | MIMAT0000434     | UGUAGUGUUUCCUACUUUAUGGA  | 1.22           | 0.34               |            |
| hsa-miR-512-3p | MIMAT0002823     | AAGUGCUGUCAUAGCUGAGGUC   | 1.22           | 1.18               |            |
| hsa-miR-92     | MIMAT0000092     | UAUUGCACUUGUCCCGGCCUG    | 1.23           | 0.42               |            |
| hsa-miR-587    | MIMAT0003253     | UUUCCAUAGGUGAUGAGUCAC    | 1.24           | 0.13               |            |
| hsa-miR-493-5p | MIMAT0002813     | UUGUACAUGGUAGGCUUUAU     | 1.27           | 0.28               |            |
| hsa-miR-519e   | MIMAT0002829     | AAAGUGCCUCCUUUUAGAGUGU   | 1.27           | 0.32               |            |
| hsa-miR-527    | MIMAT0002862     | CUGCAAAGGGAAGCCCUUUCU    | 1.29           | 0.19               |            |
| hsa-miR-127    | MIMAT0000446     | UCGGAUCCGUCUGAGCUUGGCU   | 1.30           | 0.45               |            |
| hsa-miR-92b    | MIMAT0003218     | UAUUGCACUCGUCCCGGCCUC    | 1.30           | 0.19               |            |
| hsa-miR-192    | MIMAT0000222     | CUGACCUAUGAAUUGACAGCC    | 1.31           | 0.45               |            |
| hsa-miR-802    | MIMAT0004185     | CAGUAACAAAGAUUCAUCCUUGU  | 1.32           | 0.93               |            |
| hsa-miR-544    | MIMAT0003164     | AUUCUGCAUUUUUAGCAAGU     | 1.34           | 0.58               |            |
| hsa-miR-517b   | MIMAT0002857     | UCGUGCAUCCCUUUAGAGUGUU   | 1.34           | 0.62               |            |
| hsa-miR-555    | MIMAT0003219     | AGGGUAAGCUGAACCUCUGAU    | 1.35           | 1.62               |            |
| hsa-miR-215    | MIMAT0000272     | AUGACCUAUGAAUUGACAGAC    | 1.35           | 0.47               |            |
| hsa-miR-128a   | MIMAT0000424     | UCACAGUGAACCGGUCUCUUUU   | 1.36           | 1.05               |            |
| hsa-miR-28     | MIMAT0000085     | AAGGAGCUCACAGUCUAUUGAG   | 1.38           | 0.45               |            |
| hsa-miR-222    | MIMAT0000279     | AGCUACAUCUGGCUACUGGGUCUC | 1.39           | 0.21               |            |
| hsa-miR-130a   | MIMAT0000425     | CAGUGCAAUGUUAAAAGGGCAU   | 1.42           | 0.52               |            |
| hsa-miR-149    | MIMAT0000450     | UCUGGCUCCGUGUCUUCACUCC   | 1.42           | 0.24               |            |
| hsa-miR-671    | MIMAT0003880     | AGGAAGCCUGGAGGGGCGGAGGU  | 1.43           | 1.19               |            |
| hsa-miR-519a   | MIMAT0002869     | AAAGUGCAUCCUUUUAGAGUGUAC | 1.43           | 0.03               |            |

**Supplementary Table S6 (continued)**

| miRNA name     | accession number | sequence               | av. int. score | st.dev. int. score | MirTarget2 |
|----------------|------------------|------------------------|----------------|--------------------|------------|
| hsa-miR-656    | MIMAT0003332     | AAUAUUAUACAGUCAACCUCU  | 1.48           | 2.13               |            |
| hsa-miR-380-5p | MIMAT0000734     | UGGUUGACCAUAGAACAUGCGC | 1.49           | 0.21               |            |
| hsa-miR-130b   | MIMAT0000691     | CAGUGCAAUGAUGAAAGGGCAU | 1.64           | 0.09               |            |
| hsa-miR-147    | MIMAT0000251     | GUGUGUGGAAAUGCUUCUGC   | 1.70           | 0.31               |            |
| hsa-miR-642    | MIMAT0003312     | GUCCUCUCCAAAUGUGUCUUG  | 1.77           | 0.07               |            |
| hsa-miR-519c   | MIMAT0002832     | AAAGUGCAUCUUUUUAGAGGAU | 1.77           | 0.33               |            |
| hsa-miR-647    | MIMAT0003317     | GUGGCUGCACUCACUCCUUC   | 1.80           | 0.31               |            |
| hsa-miR-432*   | MIMAT0002815     | CUGGAUGGCUCCUCAUGUCU   | 1.88           | 0.45               |            |
| hsa-miR-504    | MIMAT0002875     | AGACCCUGGUCUGCACUCUAU  | 1.92           | 1.51               |            |



**Supplementary Table S7: Results from the Gene Set Enrichment Analysis with six MYC(N) gene sets.**

NES: normalized enrichment score; FDR: false discovery rate

|                 | NES                   |                     |                          |                                  |                                   |                         |                            |                   | FDR                   |                     |                          |                                  |                                   |                         |                            |                   | # of enriched gene sets (neg) | # of enriched gene sets (pos) |
|-----------------|-----------------------|---------------------|--------------------------|----------------------------------|-----------------------------------|-------------------------|----------------------------|-------------------|-----------------------|---------------------|--------------------------|----------------------------------|-----------------------------------|-------------------------|----------------------------|-------------------|-------------------------------|-------------------------------|
|                 | COLLER_MYC_TARGETS_UP | DANG_MYC_TARGETS_UP | DANG_REGULATED_BY_MYC_UP | KIM_MYC_AMPLIFICATION_TARGETS_UP | KIM_MYCN_AMPLIFICATION_TARGETS_UP | LEE_LIVER_CANCER_MYC_UP | SCHUHMACHER_MYC_TARGETS_UP | YU_MYC_TARGETS_UP | COLLER_MYC_TARGETS_UP | DANG_MYC_TARGETS_UP | DANG_REGULATED_BY_MYC_UP | KIM_MYC_AMPLIFICATION_TARGETS_UP | KIM_MYCN_AMPLIFICATION_TARGETS_UP | LEE_LIVER_CANCER_MYC_UP | SCHUHMACHER_MYC_TARGETS_UP | YU_MYC_TARGETS_UP |                               |                               |
| hsa-let-7a-5p   | 0.86                  | 1.00                | -1.33                    | 1.59                             | 1.37                              | 1.38                    | 0.93                       | -2.95             | 0.78                  | 0.64                | 0.07                     | 0.03                             | 0.11                              | 0.12                    | 0.74                       | 0.00              | 1                             | 0                             |
| hsa-let-7b-5p   | 1.08                  | -1.12               | -1.75                    | 1.54                             | 1.44                              | 1.45                    | -0.65                      | -2.93             | 0.33                  | 0.31                | 0.01                     | 0.03                             | 0.04                              | 0.05                    | 0.98                       | 0.00              | 1                             | 0                             |
| hsa-let-7c-5p   | 1.06                  | -0.89               | -1.09                    | 1.47                             | 1.07                              | 1.35                    | 0.72                       | -2.54             | 0.44                  | 0.69                | 0.43                     | 0.16                             | 0.45                              | 0.19                    | 0.93                       | 0.00              | 1                             | 0                             |
| hsa-let-7d-5p   | -1.07                 | -1.82               | -2.13                    | 1.29                             | 1.35                              | 1.18                    | -1.57                      | -2.90             | 0.32                  | 0.00                | 0.00                     | 0.11                             | 0.08                              | 0.18                    | 0.01                       | 0.00              | 2                             | 0                             |
| hsa-let-7e-5p   | -1.31                 | 1.10                | 1.12                     | 1.34                             | 0.89                              | 0.48                    | 0.59                       | -1.80             | 0.08                  | 0.66                | 0.78                     | 0.42                             | 1.00                              | 1.00                    | 1.00                       | 0.00              | 0                             | 0                             |
| hsa-let-7f-5p   | 0.91                  | 0.88                | -1.39                    | 1.66                             | 1.39                              | 1.28                    | 0.66                       | -2.95             | 0.76                  | 0.76                | 0.04                     | 0.02                             | 0.14                              | 0.18                    | 0.95                       | 0.00              | 1                             | 0                             |
| hsa-let-7g-5p   | -1.30                 | -1.78               | -1.99                    | 1.65                             | 1.19                              | -0.96                   | -1.42                      | -2.94             | 0.11                  | 0.00                | 0.00                     | 0.01                             | 0.19                              | 0.54                    | 0.05                       | 0.00              | 1                             | 0                             |
| hsa-let-7i-5p   | -1.05                 | -1.38               | -1.69                    | 1.38                             | 1.36                              | 1.22                    | -1.41                      | -2.61             | 0.35                  | 0.06                | 0.01                     | 0.07                             | 0.07                              | 0.14                    | 0.06                       | 0.00              | 1                             | 0                             |
| hsa-miR-101-3p  | -1.24                 | 1.06                | 0.76                     | 1.82                             | 1.01                              | -0.97                   | 0.96                       | -1.78             | 0.24                  | 0.92                | 0.95                     | 0.01                             | 0.93                              | 0.69                    | 0.89                       | 0.01              | 0                             | 0                             |
| hsa-miR-193a-3p | 1.38                  | -0.89               | -1.46                    | 1.06                             | -0.98                             | 1.16                    | -0.83                      | -1.12             | 0.30                  | 1.00                | 0.25                     | 0.42                             | 1.00                              | 0.31                    | 1.00                       | 0.84              | 0                             | 0                             |
| hsa-miR-193b-3p | 1.25                  | 1.17                | 0.87                     | 1.25                             | -0.95                             | 0.97                    | 1.44                       | 1.22              | 0.30                  | 0.29                | 0.70                     | 0.44                             | 0.65                              | 0.60                    | 0.24                       | 0.28              | 0                             | 0                             |
| hsa-miR-19a-3p  | 1.64                  | 2.44                | 2.35                     | 1.32                             | 1.05                              | 1.29                    | 2.27                       | 2.79              | 0.01                  | 0.00                | 0.00                     | 0.11                             | 0.36                              | 0.12                    | 0.00                       | 0.00              | 0                             | 4                             |
| hsa-miR-19b-3p  | 1.38                  | 2.22                | 2.18                     | 1.23                             | -1.04                             | -1.14                   | 2.28                       | 2.73              | 0.06                  | 0.00                | 0.00                     | 0.14                             | 0.37                              | 0.24                    | 0.00                       | 0.00              | 0                             | 4                             |
| hsa-miR-202-5p  | 1.11                  | -1.50               | -1.66                    | -1.18                            | -1.01                             | 1.46                    | -1.23                      | -1.48             | 0.35                  | 0.06                | 0.02                     | 0.27                             | 0.50                              | 0.09                    | 0.27                       | 0.05              | 0                             | 0                             |
| hsa-miR-206     | -0.97                 | -1.19               | -1.19                    | -1.48                            | -0.53                             | -0.56                   | -1.27                      | 0.91              | 0.81                  | 0.56                | 0.46                     | 0.19                             | 0.99                              | 1.00                    | 0.45                       | 1.00              | 0                             | 0                             |
| hsa-miR-29a-3p  | 0.68                  | -1.37               | -1.70                    | 1.16                             | 0.89                              | 1.13                    | -1.29                      | -2.88             | 0.94                  | 0.06                | 0.01                     | 0.32                             | 0.76                              | 0.33                    | 0.08                       | 0.00              | 1                             | 0                             |
| hsa-miR-29b-3p  | -0.69                 | -1.67               | -1.82                    | 0.87                             | -1.09                             | 1.26                    | -1.37                      | -2.37             | 0.97                  | 0.01                | 0.00                     | 0.71                             | 0.34                              | 0.16                    | 0.07                       | 0.00              | 1                             | 0                             |
| hsa-miR-29c-3p  | 0.80                  | -1.35               | -1.62                    | 1.07                             | 0.89                              | 1.19                    | -1.20                      | -2.70             | 0.81                  | 0.07                | 0.02                     | 0.46                             | 0.75                              | 0.31                    | 0.16                       | 0.00              | 1                             | 0                             |

Supplementary Table S7 (continued)

|                        | NES                   |                     |                          |                                  |                                   |                         |                            |                   | FDR                   |                     |                          |                                  |                                   |                         |                            |                   | # of enriched gene sets (neg) | # of enriched gene sets (pos) |
|------------------------|-----------------------|---------------------|--------------------------|----------------------------------|-----------------------------------|-------------------------|----------------------------|-------------------|-----------------------|---------------------|--------------------------|----------------------------------|-----------------------------------|-------------------------|----------------------------|-------------------|-------------------------------|-------------------------------|
|                        | COLLER_MYC_TARGETS_UP | DANG_MYC_TARGETS_UP | DANG_REGULATED_BY_MYC_UP | KIM_MYC_AMPLIFICATION_TARGETS_UP | KIM_MYCN_AMPLIFICATION_TARGETS_UP | LEE_LIVER_CANCER_MYC_UP | SCHUHMACHER_MYC_TARGETS_UP | YU_MYC_TARGETS_UP | COLLER_MYC_TARGETS_UP | DANG_MYC_TARGETS_UP | DANG_REGULATED_BY_MYC_UP | KIM_MYC_AMPLIFICATION_TARGETS_UP | KIM_MYCN_AMPLIFICATION_TARGETS_UP | LEE_LIVER_CANCER_MYC_UP | SCHUHMACHER_MYC_TARGETS_UP | YU_MYC_TARGETS_UP |                               |                               |
| <b>hsa-miR-34a-5p</b>  | 1.54                  | 1.56                | 1.18                     | 1.53                             | 0.95                              | 1.39                    | 1.51                       | 0.94              | 0.04                  | 0.06                | 0.28                     | 0.03                             | 0.70                              | 0.07                    | 0.02                       | 0.66              | 0                             | 0                             |
| <b>hsa-miR-34b-5p</b>  | 1.55                  | 1.39                | 1.06                     | -1.33                            | -1.26                             | -0.61                   | 0.97                       | 2.13              | 0.04                  | 0.08                | 0.41                     | 0.17                             | 0.19                              | 1.00                    | 0.51                       | 0.00              | 0                             | 1                             |
| <b>hsa-miR-34c-5p</b>  | 1.67                  | 1.65                | 1.57                     | -1.06                            | -1.02                             | 0.84                    | 1.50                       | 2.32              | 0.01                  | 0.01                | 0.02                     | 0.46                             | 0.40                              | 0.89                    | 0.03                       | 0.00              | 0                             | 1                             |
| <b>hsa-miR-449a</b>    | 1.80                  | 1.99                | 1.12                     | 1.34                             | -0.86                             | 1.24                    | 1.49                       | 2.71              | 0.00                  | 0.00                | 0.25                     | 0.09                             | 0.72                              | 0.14                    | 0.05                       | 0.00              | 0                             | 1                             |
| <b>hsa-miR-449b-5p</b> | -1.35                 | -1.29               | -1.34                    | -1.17                            | -1.07                             | -1.46                   | -1.39                      | -1.14             | 0.12                  | 0.14                | 0.11                     | 0.28                             | 0.43                              | 0.07                    | 0.08                       | 0.32              | 0                             | 0                             |
| <b>hsa-miR-494-3p</b>  | -0.79                 | 1.48                | 1.45                     | 1.02                             | 0.82                              | -1.34                   | 1.00                       | 2.45              | 0.87                  | 0.12                | 0.11                     | 0.95                             | 0.79                              | 0.08                    | 0.70                       | 0.00              | 0                             | 1                             |
| <b>hsa-miR-98-5p</b>   | -1.44                 | -1.45               | -1.52                    | 1.47                             | 0.93                              | -0.95                   | -1.17                      | -2.40             | 0.05                  | 0.06                | 0.04                     | 0.08                             | 0.59                              | 0.66                    | 0.25                       | 0.00              | 1                             | 0                             |
